# Supplementary material
Source: publisher figshare collection journal article supplement (https://gsapubs.figshare.com/ndownloader/files/38281038)
Supplement: Supplementary file 1 [file 38281038]

Rood, A.H., Rood, D.H., Balco, G., Stafford, P.J., Grant Ludwig, L., Kendrick, K.J., and Wilcken, K.M., 2022, Validation of earthquake ground-motion models in southern California, USA, using precariously balanced rocks: GSA Bulletin, <https://doi.org/10.1130/B36484.1>.

## Supplemental Material

**Figure S1.** The following color figures are equivalent to Figures 2, 3, and 5 in the main text, for all 20 precariously balanced rocks (PBRs) in this study.

**Table S1-1.** Full parameters used for precariously balanced rock (PBR) sample data reduction.

**Table S1-2.** Full parameters used for stream-sediment sample data reduction.

**Table S1-3.** Full parameters used for saprolite sample data reduction.

**Table S1-4.** Data for process blanks.

**Table S2.** Inputs to Balco et al. (2011) fragility age model: Sample-specific constants, and  $^{10}\text{Be}$  concentrations for all the precariously balanced rock (PBR) samples.

**Table S3.** Best-fit parameter results of the fragility age forward model.

**Table S4.** Median and 16th-84th percentile uncertainty parameter results of the fragility age forward model.

**Table S5.** Stream-sediment samples online erosion rate calculator inputs and outputs.

**Table S6.** Saprolite samples online erosion rate calculator inputs and outputs.

## Figure S1.

### Introduction

The following color figures are equivalent to Figures 2, 3, and 5, for all 20 precariously balanced rocks (PBRs) in this study. One page is dedicated to each PBR and includes all three results figures (fragility, fragility age, and hazard validation) for that PBR. The general figure captions are provided below. PBR-specific captions and discussion are provided for each PBR on its dedicated page.

**Fragility Results.** (A) Field photo shows the most slender view of the precariously balanced rock (PBR) on its pedestal compared to the 3-D model constructed of the PBR using photogrammetry. (B) Area of the PBR 3-D model showing the surface that is in contact with the pedestal, i.e., as viewed from below the base of the rock up toward the center of mass; it is labelled with the geometric parameters that were measured, which are required for toppling calculations. Gray circles are the critical rocking points that define the narrowest basal 2-D section through the center of mass (yellow circle). Alpha values (in radians) are shown in gray text and radius length (in meters) are shown in yellow. The lowest alpha value is the direction in which rock will topple. (C) Fragility function of the PBR. The 25th, 50th (median), and 75th percentile ground motions are labeled.

**Fragility Age Results.** (A) Sample locations are labelled as blue circles on field photos of each precariously balanced rock (PBR). (B) Graphs show  $^{10}\text{Be}$  concentration (x-axis) and depth below PBR top (y-axis). Left graph shows the components of the total predicted nuclide concentration attributable to different phases of PBR exhumation. Blue line is before exhumation, yellow line is during exhumation, and gray line is after exhumation. Right graph shows the nuclide concentrations measure in the samples (blue circles) compared with those predicted by the forward model best-fitting parameters (open black circles). Light gray circles are samples that were not used in the modeling of PBR exhumation. Yellow circles are the measured concentrations in the saprolite samples plotted at the approximate height in the landscape relative to the PBR. Error bars show  $1\sigma$  uncertainty on measured nuclide concentrations; error bars not shown were equal to or smaller than the size of the symbols. The horizontal dashed line is the height of the lowest point on the PBR-pedestal contact. (C) Histogram of  $t_{tip}$  age, in ka, calculated by each of the 400 Monte Carlo simulation iterations. Black circles on the cumulative black curves of output  $t_{tip}$  ages indicate the 16th, median (50th), and 84th percentile ages.

**Hazard Validation Results.** (A) Hazard curves computed by the OpenQuake engine (Pagani et al., 2014) for the location of the precariously balanced rock (PBR) are shown. The lower (dotted line), central (solid line), and upper (dashed line) curves are plotted for each ground-motion model (GMM) as well as the weighted mean hazard curve (yellow line). Each hazard curve is produced by the “true mean” UCERF3 source model with each branch of the GMM logic tree (Field et al., 2013; Rao et al., 2017). The spread between the upper and lower backbone hazard curves for each GMM represents the epistemic uncertainty in the ground motions estimated by that GMM. (B) The hazard curves for the location of the PBR (the same curves as in A) are colored by whether they pass (blue lines) the PBR validation, i.e., the ground-motion estimates are consistent with a 5% probability of survival of the PBR, or fail (black lines) the PBR validation, i.e., the ground-motion estimates are inconsistent with a 5% probability of survival of the PBR.

# BR1

## Fragility Results

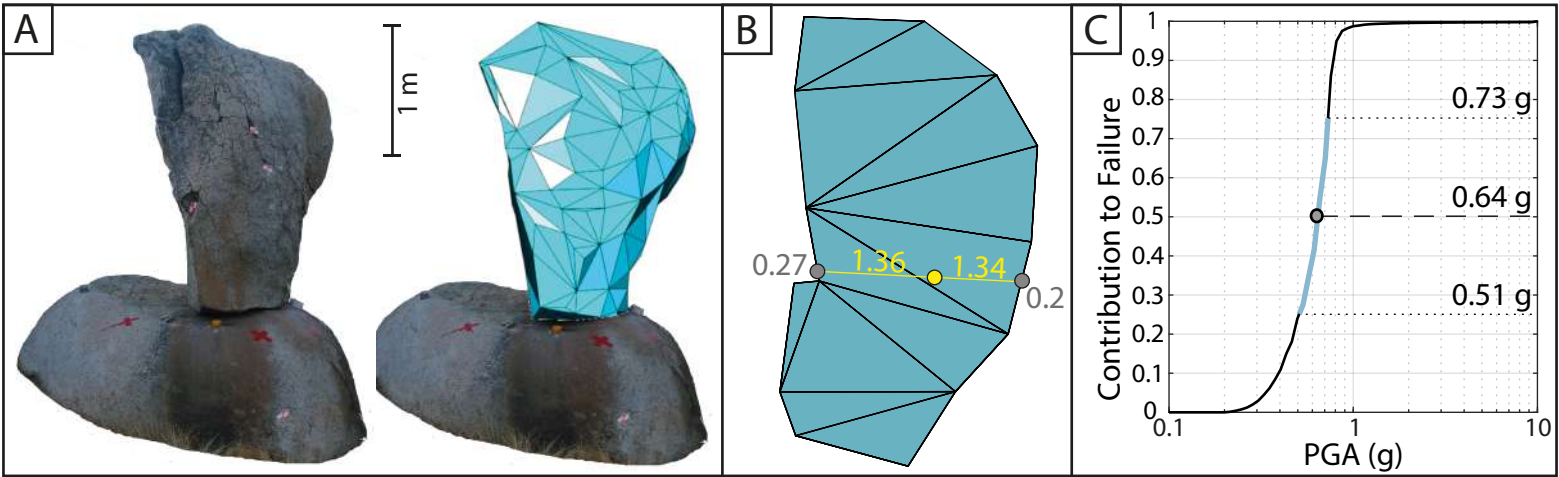

(A) One planar side of the PBR with a lighter color than the rest of the outcrop (left side in photo) may indicate significant mass loss, resulting in the PBR geometry evolving at some unknown time before the present. However, there was no evidence of this lost material on the ground surface below the pedestal. (B) The two alternative methods of selecting  $\alpha_1$  and  $\alpha_2$  produce near identical values, therefore, we are confident that the basal area of BR1 approximates the rectangular basal geometry that was described by the Purvance et al. (2008) fragility equations.  $\alpha_2$  is 1.34 times greater than  $\alpha_1$ , so BR1 is classified as having an asymmetric rocking response. A narrower bottom than top of the PBR results in a high center of mass over a small basal area.

## Fragility Age Results

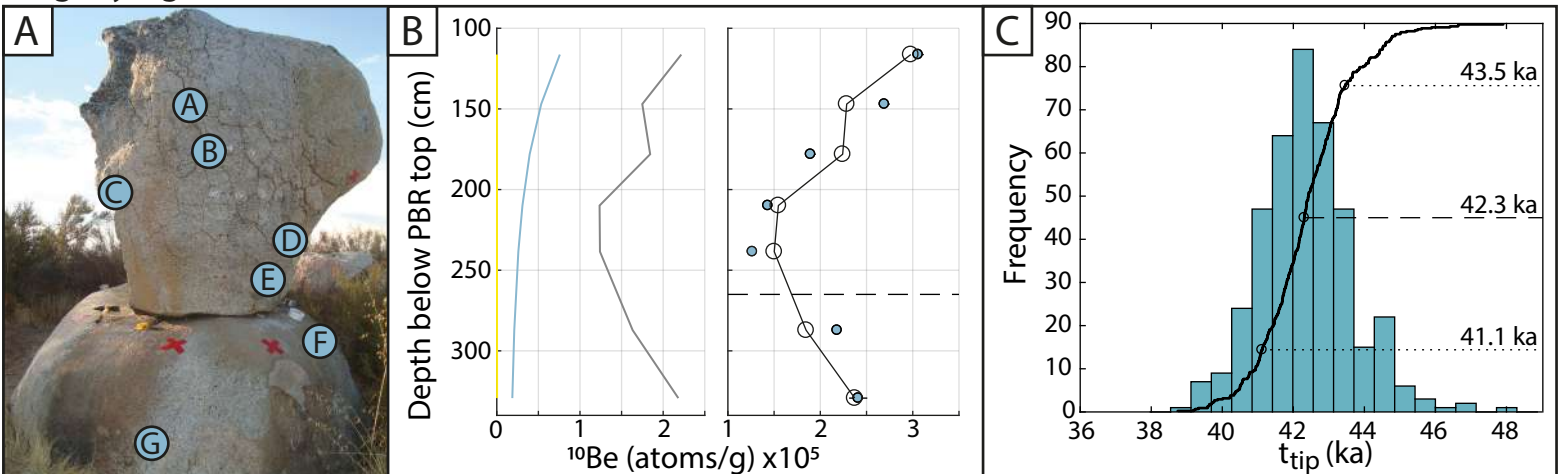

(A) Field observations of case-hardening and dark varnished areas on the sampled side of PBR and pedestal indicate an aged rock surface and, therefore, little post-exhumation physical weathering. Samples A - E are on the PBR and samples F and G are on the pedestal. (B) An instantaneous exhumation rate,  $\epsilon_i$ , results in no  $^{10}\text{Be}$  accumulation during exhumation (yellow line). The overprediction of modeled  $^{10}\text{Be}$  concentration in sample C, attributed to the post-exhumation phase of accumulation (gray line), may support the occurrence of mass loss from one side of BR1. Sample C is located on the edge of where the mass loss may have occurred and so its shielding based on the present geometry would be significantly lower than a pre-mass loss geometry, resulting in the  $^{10}\text{Be}$  concentration to be overpredicted. Misfit between the modeled and measured  $^{10}\text{Be}$  concentrations of other samples may suggest that the shielding has changed through time or differential erosion has occurred.

## Hazard Validation Results

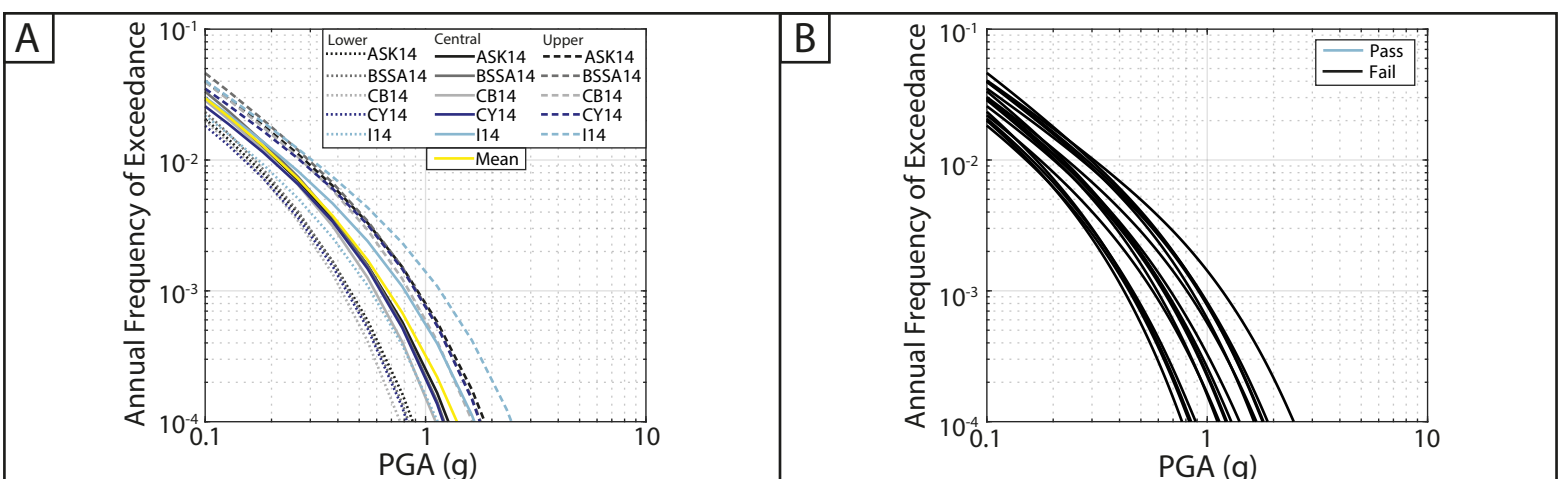

BR1 is located between the San Jacinto and Elsinore faults, which are the dominant seismic sources controlling the seismicity at the site. The old fragility age and unstable fragility of BR1 cause all three branches (upper, central, and lower) of all five GMMs to be inconsistent with a 5% probability of survival of BR1. The removal of the I14 GMM, at 2475 year mean return period, reduces the mean ground-motion estimate by 4% and reduces the range of estimated 5th–95th fractile ground motions by 29% at the BR1 site.

# BS1

## Fragility Results

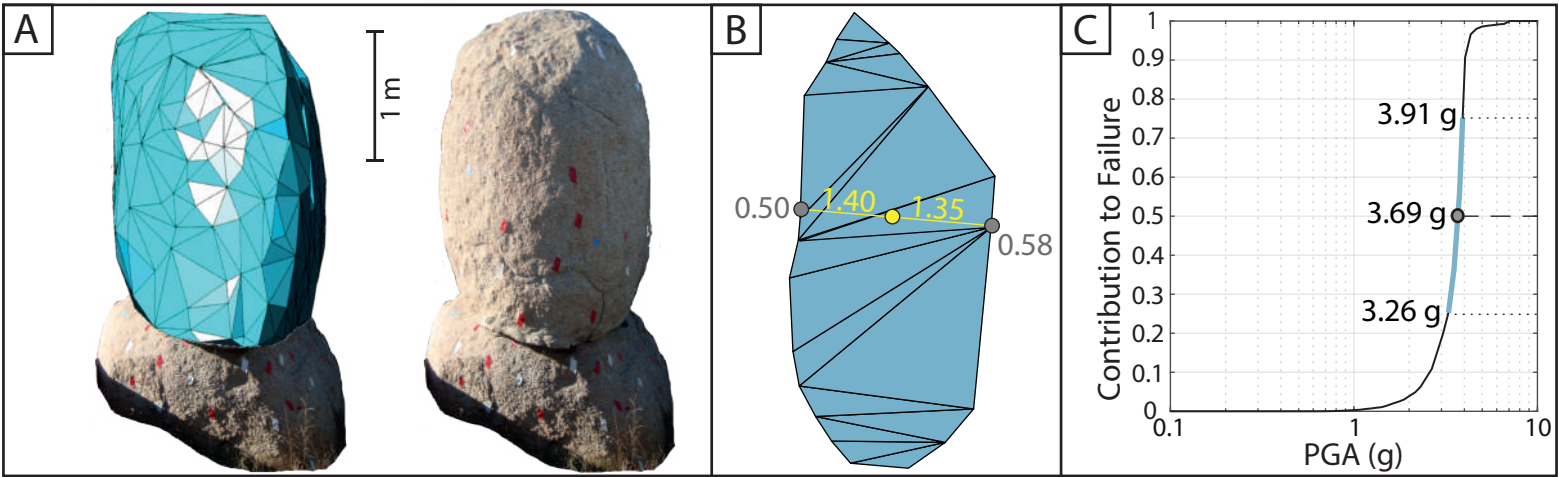

(A) There was no evidence of post-exhumation erosion of the PBR. B) The two alternative methods of selecting  $\alpha_1$  and  $\alpha_2$  produce identical critical rocking points, therefore, we are confident that the basal area of BS1 approximates the rectangular basal geometry that was described by the Purvance et al. (2008) fragility equations.  $\alpha_2$  is a factor of 1.15 greater than  $\alpha_1$ , so BS1 is classified as having an asymmetric rocking response. The tall but wide geometry of BS1 means that this is the least fragile PBR we studied. However, the  $\alpha_2$  of BS1 is greater than the range investigated by Purvance et al. (2008), which reduces our confidence in the fragility characterization of BS1.

## Fragility Age Results

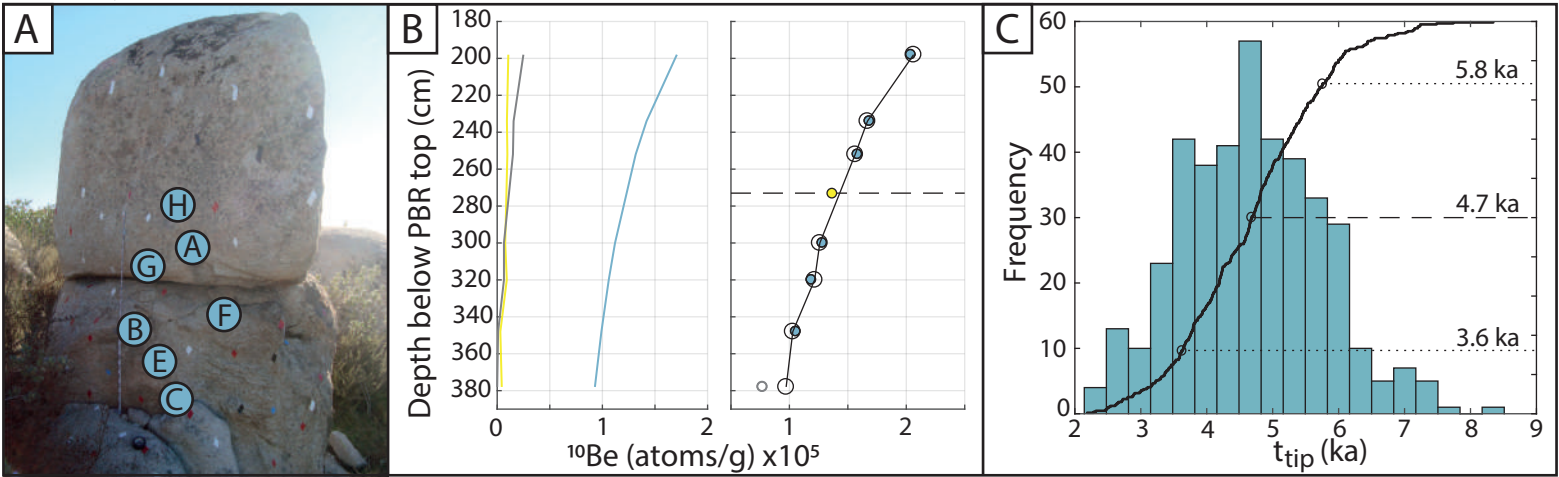

(A) Samples A, G, and H are located on the PBR and samples B, C, D, and F are located on the pedestal. (B) Sample C was excluded from the model fitting because field observations suggested a block was recently removed from the position of sample C. The removal of such a block would have the effect of the present shielding being too low and, therefore, the  $^{10}\text{Be}$  production rate being too high. This potential block removal is supported by the forward model overpredicting the  $^{10}\text{Be}$  concentration in C, as a result of an erroneously high production rate for this sample. The remaining 6 samples used by the forward model are equally distributed above and below the pedestal and span  $\sim 1.5$  m. The saprolite sample at this site was collected at approximately the height of the PBR-pedestal contact. The measured  $^{10}\text{Be}$  concentration in the saprolite sample (yellow circle) matches the concentrations predicted by the forward model, which validates the model and its results.

## Hazard Validation Results

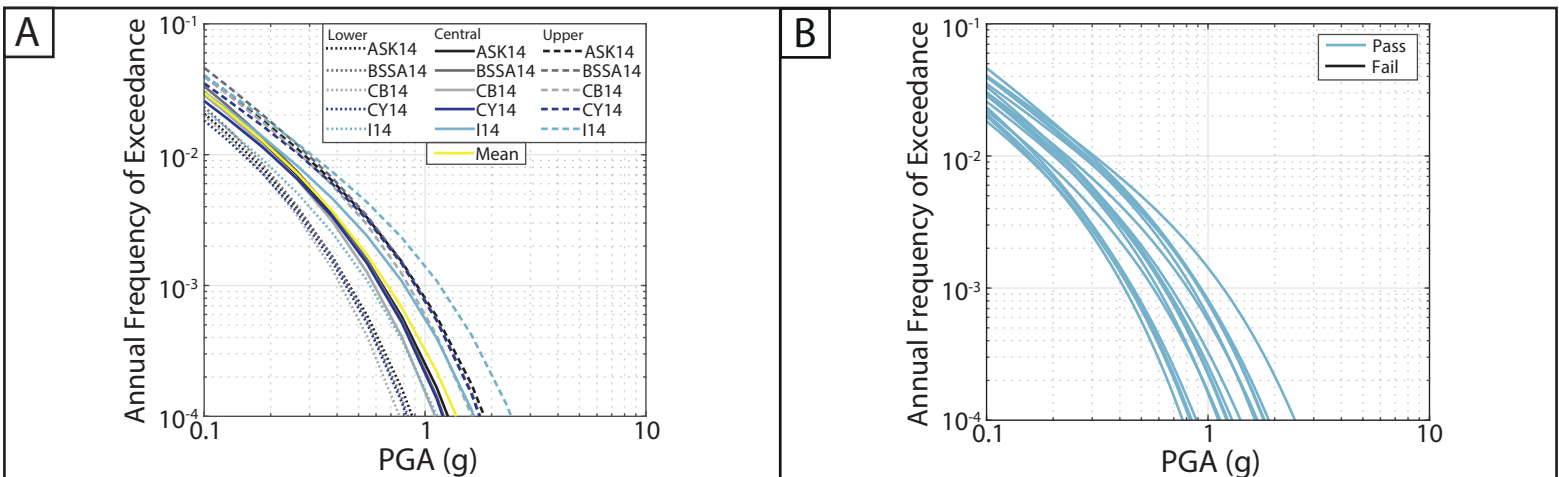

BS1 is located between the San Andreas and San Jacinto faults, which are the dominant seismic sources controlling the seismicity of the site. The relatively young fragility age and stable fragility of BS1 cause none of the three branches (upper, central, and lower) of all five GMMs to be inconsistent with a 5% probability of survival of BS1. The removal of the I14 GMM, at 2475 year mean return period, reduces the mean ground-motion estimate by 4% and reduces the range of estimated 5th–95th fractile ground motions by 29% at the BS1 site.



## Fragility Results Figures

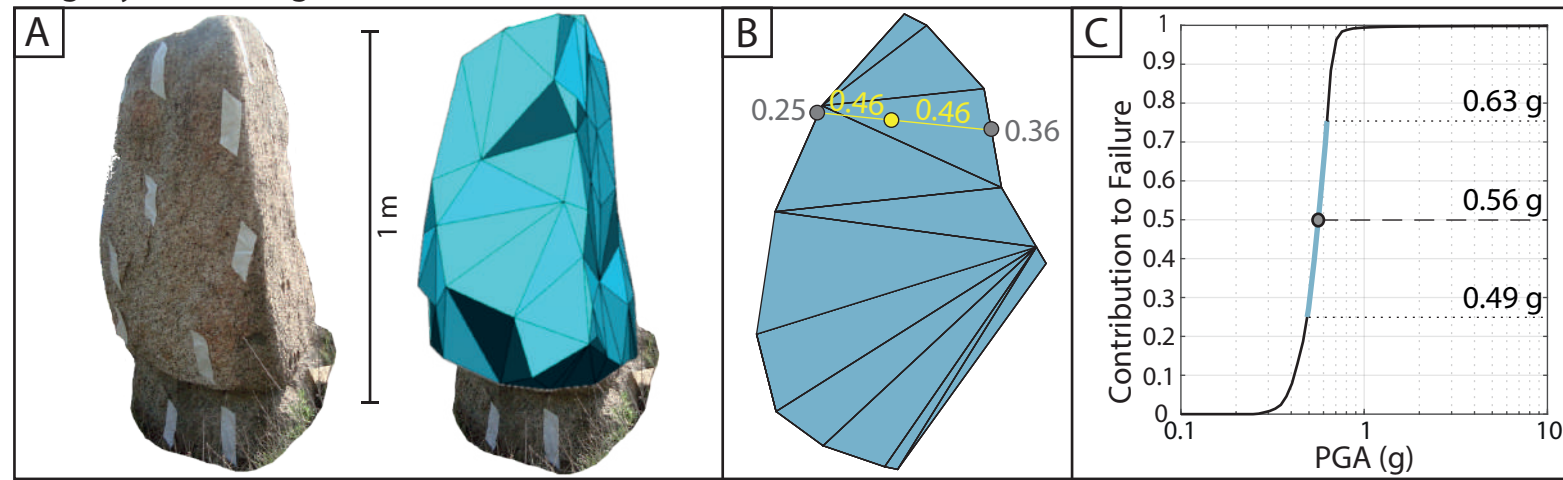

(A) The planar sides of BS2 align with the planar sides of the pedestal, therefore, we are confident that the PBR has the same geometry as when it was exhumed and that post-exhumation erosion has not occurred. (B) The wedge-shaped basal geometry of BS2 and the overhang at the narrower end cause the center of mass to be located much closer to one end of the PBR than the other. The geometry of BS2 is such that there is a 20% difference in  $\alpha_1$  and a 53% difference in  $\alpha_2$  between the two alternative methods of selecting the critical rocking points. Its geometry, therefore, greatly differs from the rectangular block geometry that the Purvance et al. (2008) fragility equations were intended to model, which reduces our confidence in the fragility characterization of BS2.

## Fragility Age Results Figures

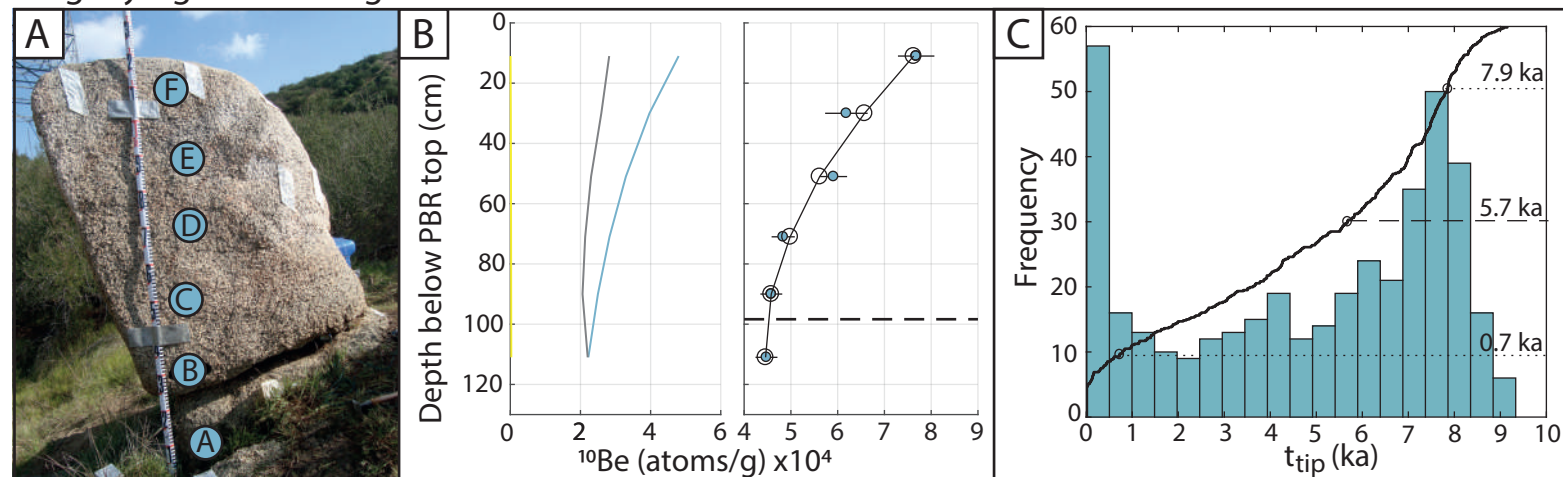

(A) Samples B - F are located on the PBR and sample A is located on the pedestal. The short pedestal height made it possible to only collect a single sample from the pedestal. (B) The best-fit  $\epsilon_1$  value is an instantaneous exhumation rate, therefore, no  $^{10}\text{Be}$  accumulation during exhumation is modeled (yellow line). The best-fit modeled  $^{10}\text{Be}$  concentrations of all samples overlap the measured  $^{10}\text{Be}$  concentrations within  $1\sigma$  uncertainties. (C) The spread of  $t_{\text{tip}}$  ages is the result of a large uncertainty in the Monte Carlo  $\epsilon_1$  results. The high  $\epsilon_1$  values produce the older tip ages and the young age tail and peak are associated with lower  $\epsilon_1$  values. Because the samples were collected from a planar surface, the shielding values result in a post-exhumation  $^{10}\text{Be}$  profile (gray line) that has a shape similar to the pre-exhumation  $^{10}\text{Be}$  profile (blue line), which has the net effect of producing a non-unique  $t_{\text{tip}}$  solution.

## Hazard Validation Results Figures

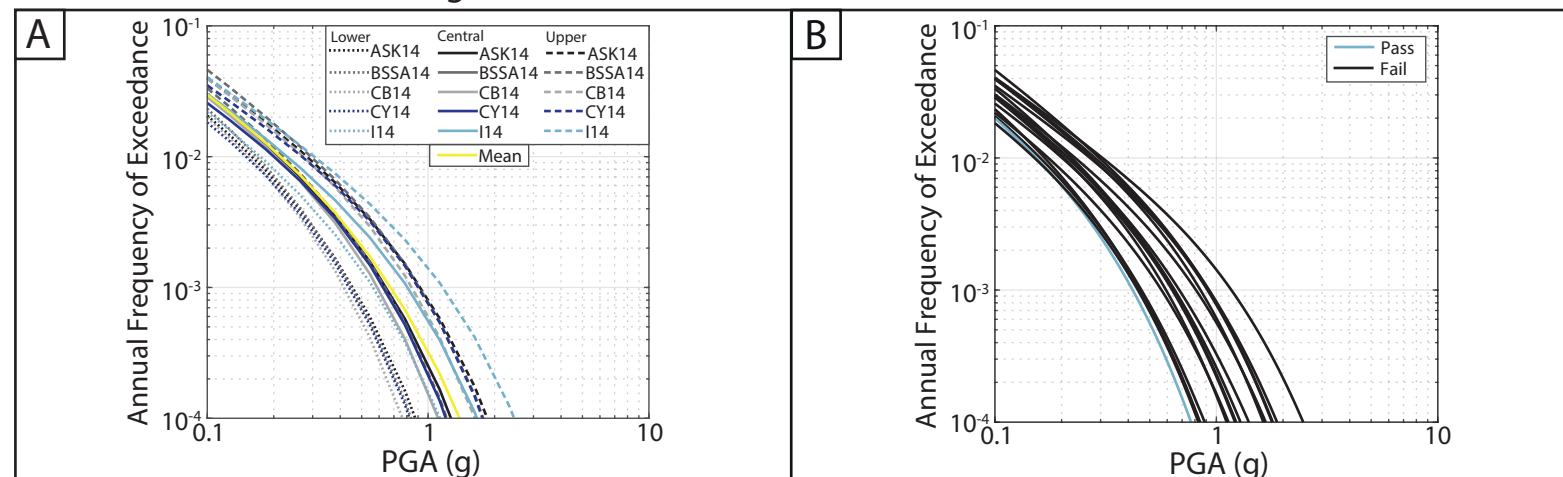

BS2 is located between the San Andreas and San Jacinto faults, which are the dominant seismic sources controlling the seismicity of the site. The relatively young fragility age and moderate fragility of BS2 cause the ground-motions estimated by the central and upper branches of all five GMMs and the lower branch of ASK14, BSSA14, CY14, and I14 to be inconsistent with a 5% probability of survival of BS2. The removal of the I14 GMM, at 2475 year mean return period, reduces the mean ground-motion estimate by 4% and reduces the range of estimated 5th–95th fractile ground motions by 29% at the BS2 site.

# GV1

## Fragility Results Figures

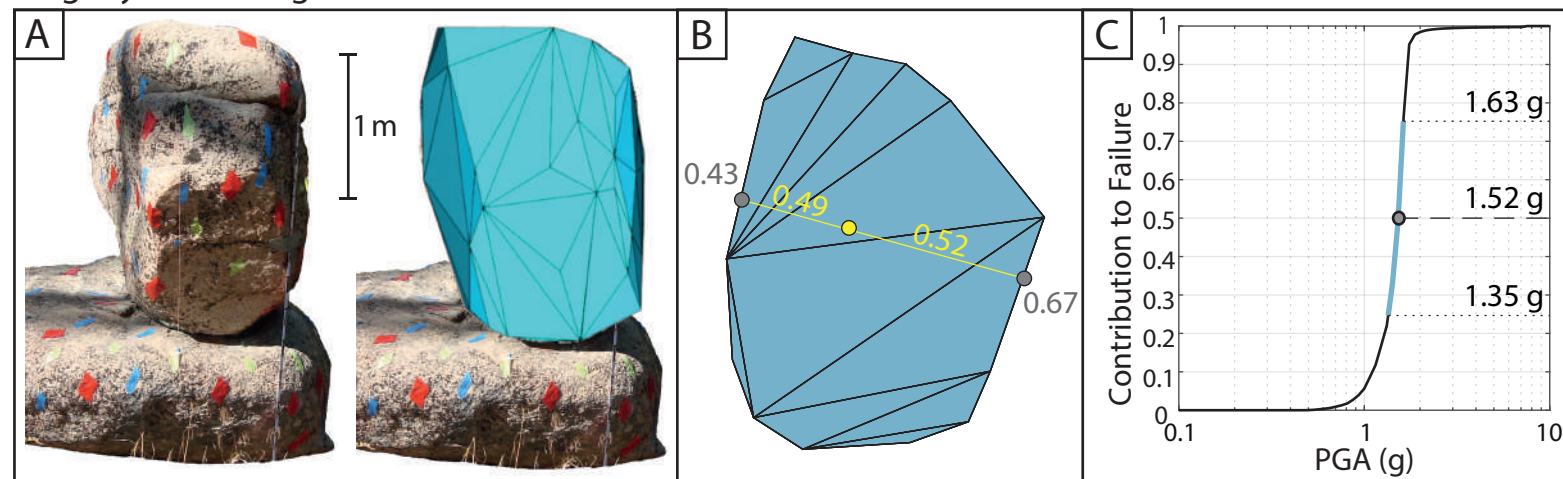

(A) Dark varnish on the PBR and pedestal indicates the occurrence of negligible post-exhumation erosion. (B) The two alternative methods of selecting  $\alpha_1$  and  $\alpha_2$  produce the same critical rocking points, therefore, we are confident that the basal area of GV1 approximates the rectangular basal geometry that was described by the Purvance et al. (2008) fragility equations.  $\alpha_2$  is 1.57 times greater than  $\alpha_1$ , so GV1 is classified as having an asymmetric rocking response. However, the  $\alpha_2$  of GV1 is greater than the range investigated by Purvance et al. (2008), which reduces our confidence in the fragility characterization of GV1.

## Fragility Age Results Figures

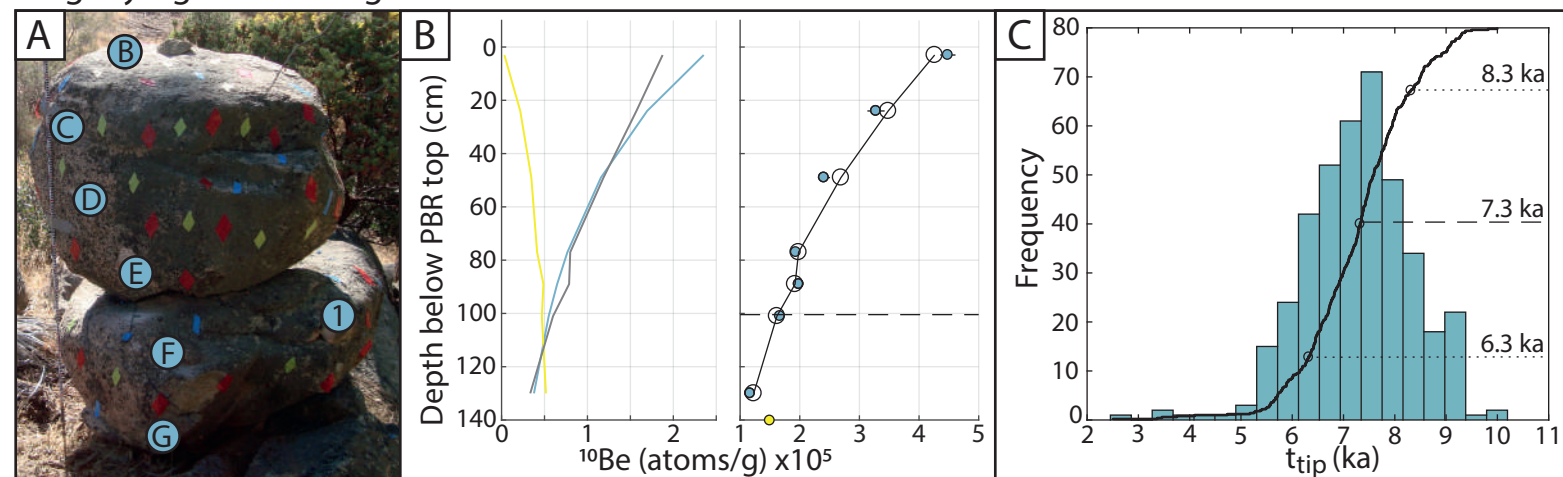

(A) Samples B - E are located on the PBR and samples 1, F, and G are located on the pedestal. (B) The fact that the samples were not collected from a single planar surface, but instead curve around one side of the pedestal, results in the shape of the post-exhumation profile of  $^{10}\text{Be}$  concentration with sample depth (gray line) to be distinct from the pre-exhumation profile of  $^{10}\text{Be}$  concentration with sample depth (blue line). The best-fit modeled  $^{10}\text{Be}$  concentrations of all samples overlap the measured  $^{10}\text{Be}$  concentrations within  $1\sigma$  uncertainties. The saprolite sample was collected on the ground surface. The measured  $^{10}\text{Be}$  concentration in the saprolite sample is within the range of concentrations, which validates the model and its results.

## Hazard Validation Results Figures

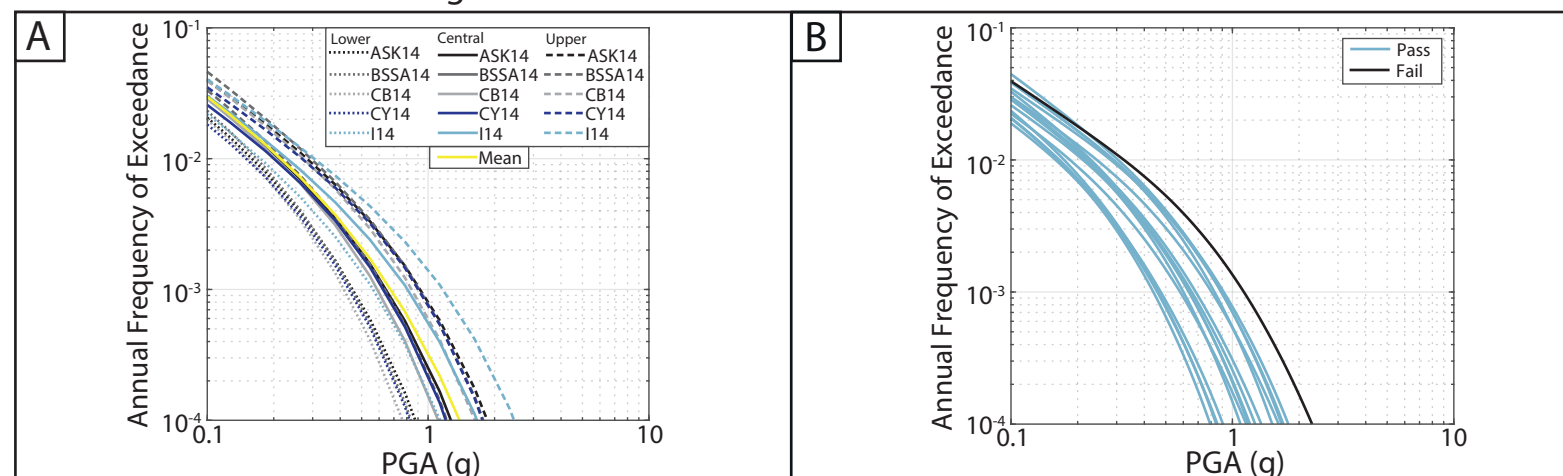

The dominant seismic sources for the GV1 site are the San Andreas fault, Cleghorn fault, San Jacinto fault, and North Frontal thrust faults. The combination of the moderately old fragility age and relatively stable fragility of GV1 causes the ground-motions estimated by the upper branch of I14 to be inconsistent with a 5% probability of survival of GV1. The removal of the I14 GMM, at 2475 year mean return period, reduces the mean ground-motion estimate by 4% and reduces the range of estimated 5th–95th fractile ground motions by 27% at the GV1 site.



## Fragility Results Figures

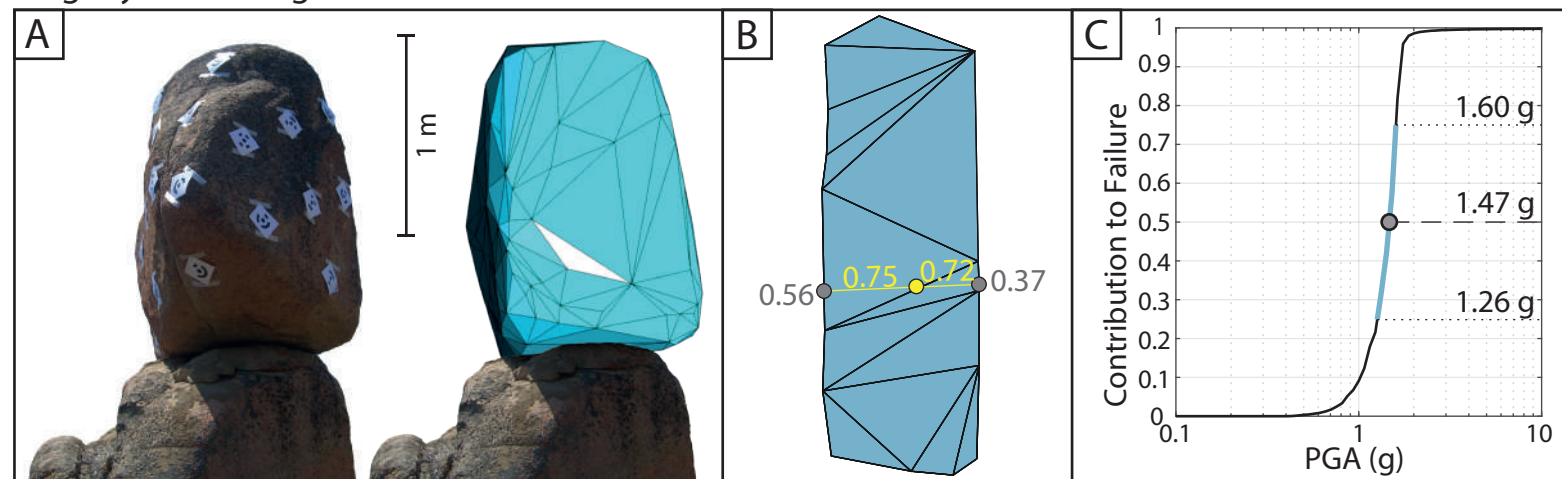

(A) Dark varnish on the PBR and pedestal indicates the occurrence of negligible post-exhumation erosion. The PBR overhangs its pedestal at one end, however, this is not in the 2-D rocking direction and so does not contribute to the fragility of the PBR. (B) The two alternative methods of selecting  $\alpha_1$  and  $\alpha_2$  produce the same critical rocking points, therefore, we are confident that the basal area of GV2 approximates the rectangular basal geometry that was described by the Purvance et al. (2008) fragility equations.  $\alpha_2$  is 1.49 times greater than  $\alpha_1$ , so GV2 is classified as having an asymmetric rocking response. However, the  $\alpha_2$  of GV2 is greater than the range investigated by Purvance et al. (2008), which reduces our confidence in the fragility characterization of GV2.

## Fragility Age Results Figures

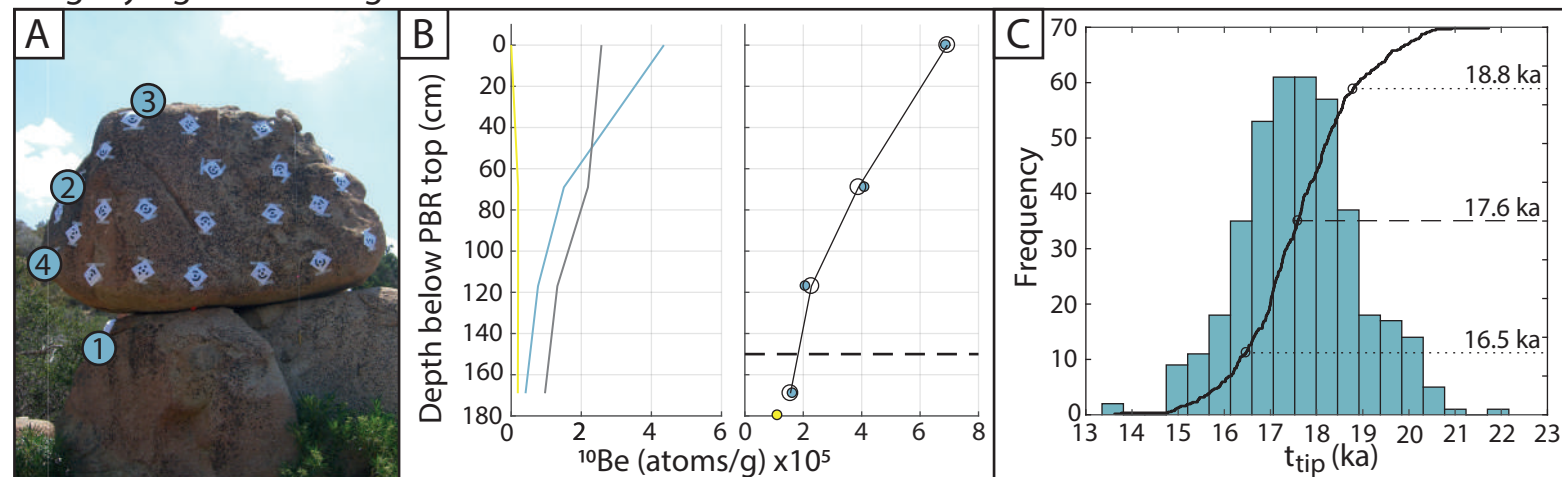

(A) Samples 2 - 4 are located on the PBR and sample 1 is located on the pedestal. (B) The fact that the samples were not collected from a single planar surface, but instead curve around one side of the PBR and pedestal, results in the shape of the post-exhumation profile of  $^{10}\text{Be}$  concentration with sample depth (gray line) to be distinct from the pre-exhumation profile of  $^{10}\text{Be}$  concentration with sample depth (blue line). The best-fit modeled  $^{10}\text{Be}$  concentrations of all samples overlap the measured  $^{10}\text{Be}$  concentrations within  $1\sigma$  uncertainties. The saprolite sample was collected on the ground surface  $\sim 1$  m below sample 1. Therefore, the measured  $^{10}\text{Be}$  concentration in the saprolite sample is expected to be lower than in sample 1, which is what is observed and validates the model and its results.

## Hazard Validation Results Figures

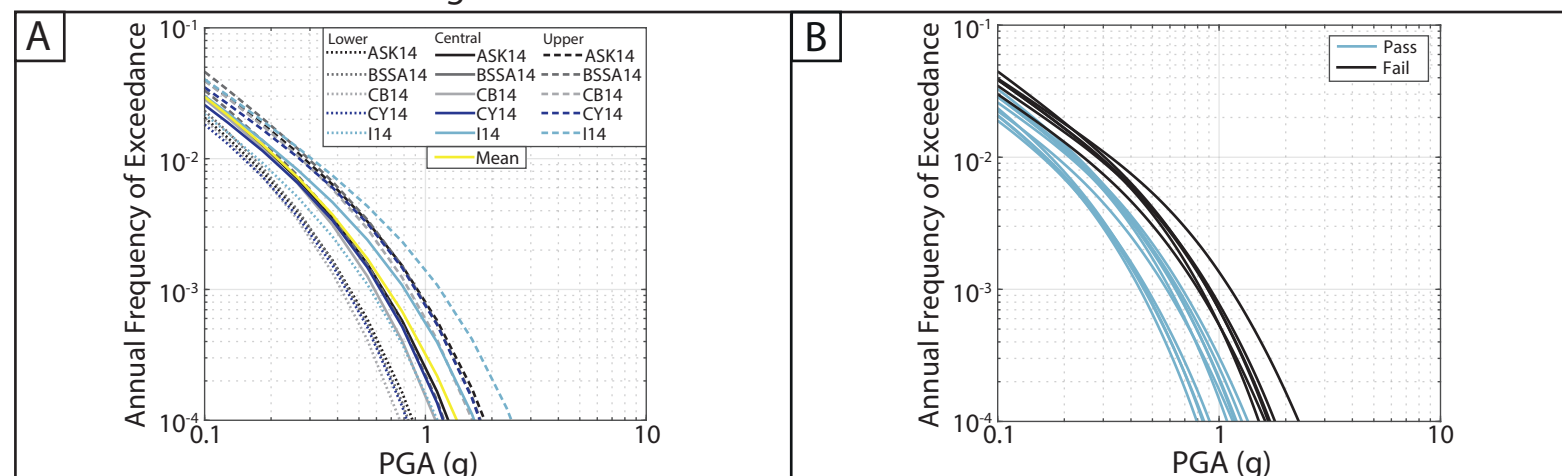

The dominant seismic sources for the GV2 site are the San Andreas fault, Cleghorn fault, San Jacinto fault, and North Frontal thrust faults. The combination of the relatively old fragility age and moderate fragility of GV2 cause the ground-motions estimated by the upper branches of all five GMMs and the central branch of I14 to be inconsistent with a 5% probability of survival of GV2. The removal of the I14 GMM, at 2475 year mean return period, reduces the mean ground-motion estimate by 4% and reduces the range of estimated 5th–95th fractile ground motions by 27% at the GV2 site.

# LB05

## Fragility Results Figures

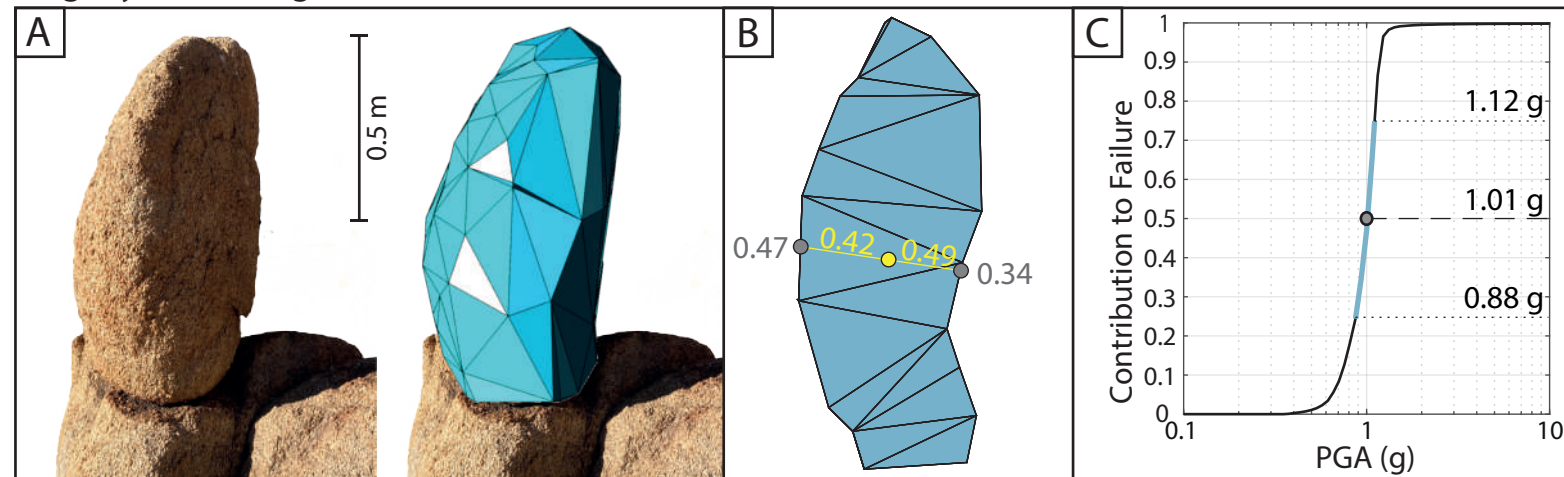

## Fragility Age Results Figures

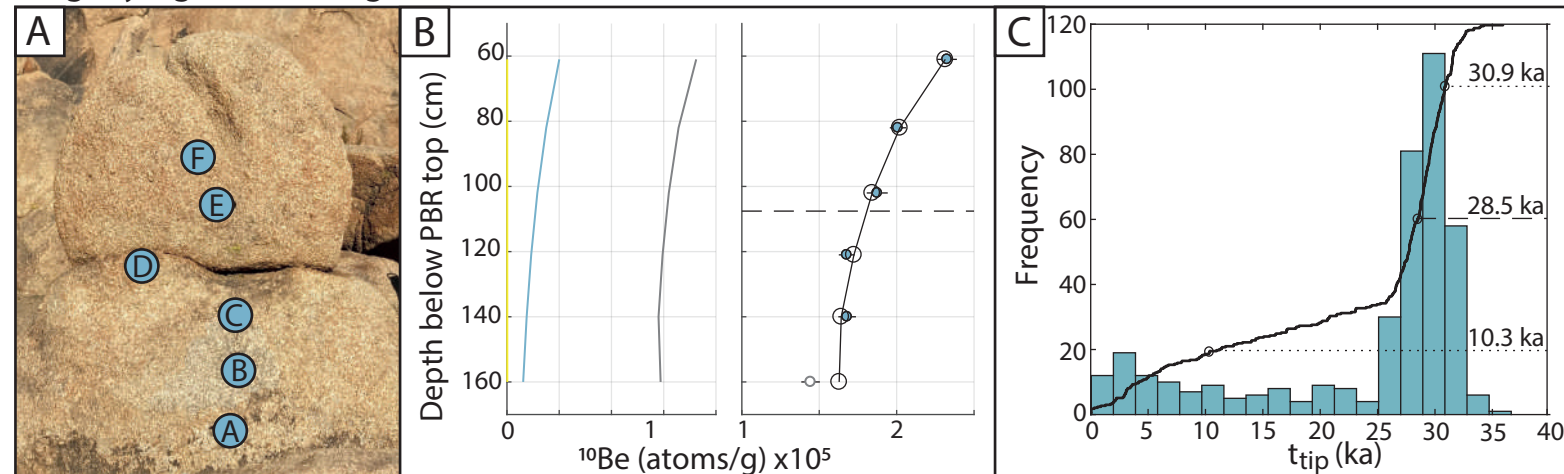

## Hazard Validation Results Figures

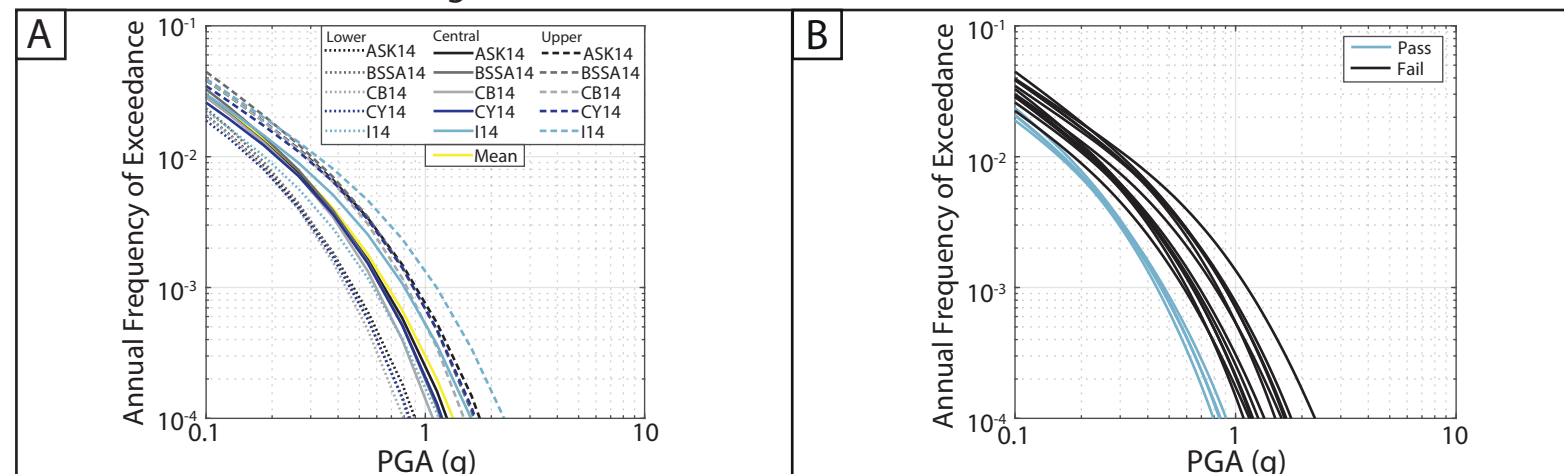



## Fragility Results Figures

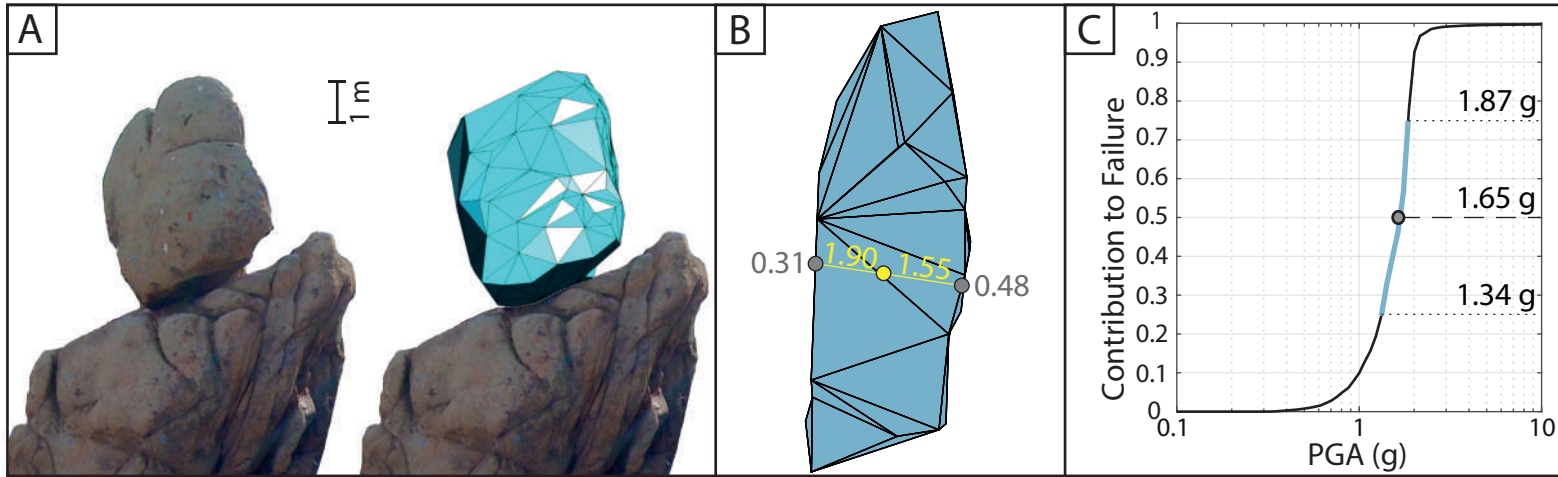

(A) LJ1 has the greatest height of our studied PBRs. The surface of LJ1 and its pedestal have a well-developed varnish and the sides are bound by joints that continue into the pedestal, which indicate the occurrence of negligible post-exhumation erosion. (B) The PBR-pedestal contact area is narrower than the maximum length and width of the PBR, therefore, LJ1 is more fragile than one might expect. The two alternative methods of selecting  $\alpha_1$  and  $\alpha_2$  produce near identical values, therefore, we are confident that the basal area of LJ1 approximates the rectangular basal geometry that was described by the Purvance et al. (2008) fragility equations.  $\alpha_2$  is 1.55 times greater than  $\alpha_1$ , so LJ1 is classified as having an asymmetric rocking response.

## Fragility Age Results Figures

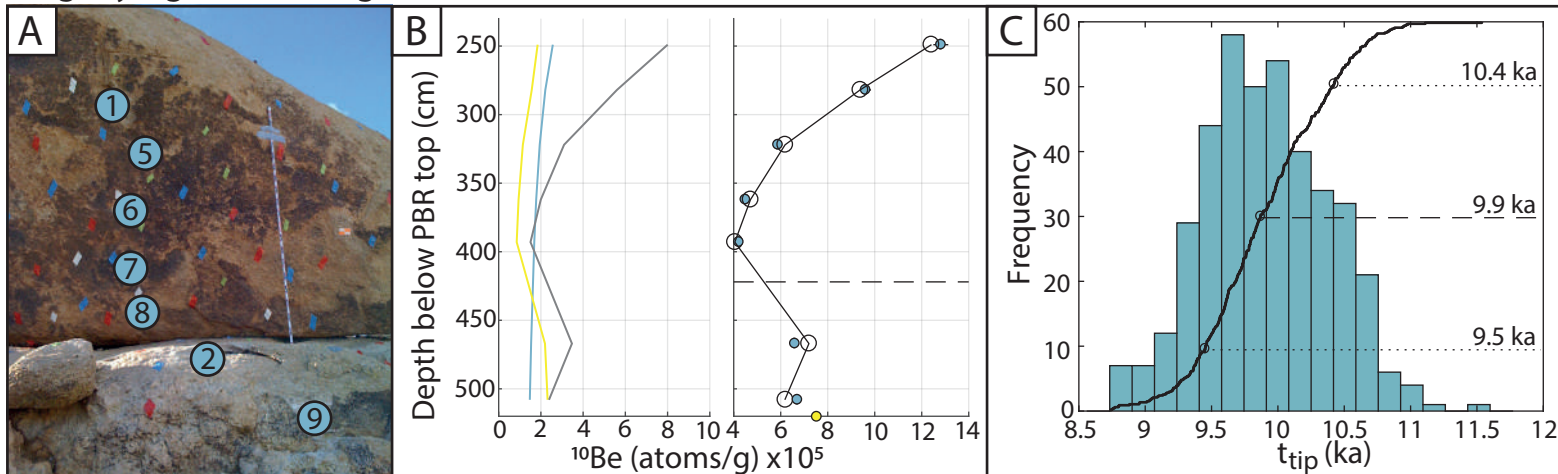

(A) Samples 1 and 5 - 8 are located on the PBR and samples 2 and 9 are located on the pedestal. (B) The fact that all the samples were not collected from a planar surface, but instead curve around onto the pedestal, results in the shape of the post-exhumation profile of  $^{10}\text{Be}$  production with sample depth (gray line) to be distinct from the pre-exhumation  $^{10}\text{Be}$  production with sample depth (blue line). The saprolite sample was collected on the ground surface  $\sim 2$  m below sample 9, on the opposite side of the outcrop from the PBR-pedestal sample profile. The shielding, and so the  $^{10}\text{Be}$  production rate, is different for the saprolite sample than the PBR-pedestal samples. Therefore, the measured  $^{10}\text{Be}$  concentration in the saprolite sample is only expected to be within the range of concentrations, which is what is observed and validates the model and its results.

## Hazard Validation Results Figures

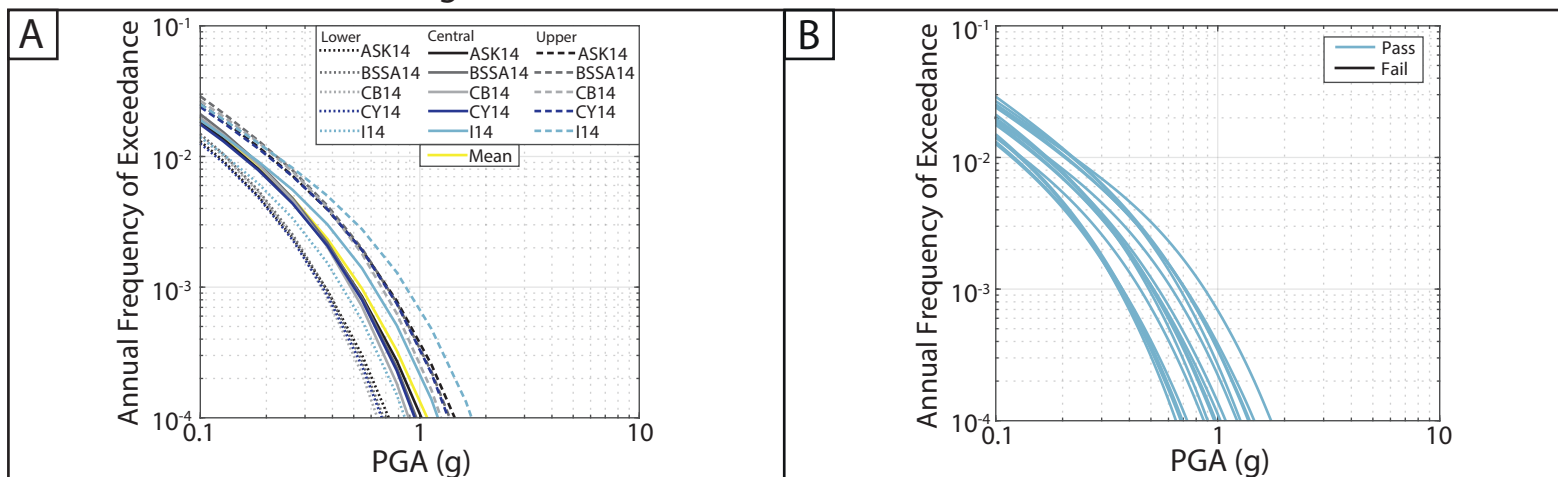

The dominant seismic source for the LJ1 site is the San Andreas fault. The combination of the relatively old fragility age and moderate fragility of LJ1 cause none of the three branches (upper, central, and lower) of all five GMMs to be inconsistent with a 5% probability of survival of LJ1. The removal of the I14 GMM, at 2475 year mean return period, reduces the mean ground-motion estimate by 3% and reduces the range of estimated 5th–95th fractile ground motions by 25% at the LJ1 site.

# LJ5

## Fragility Results Figures

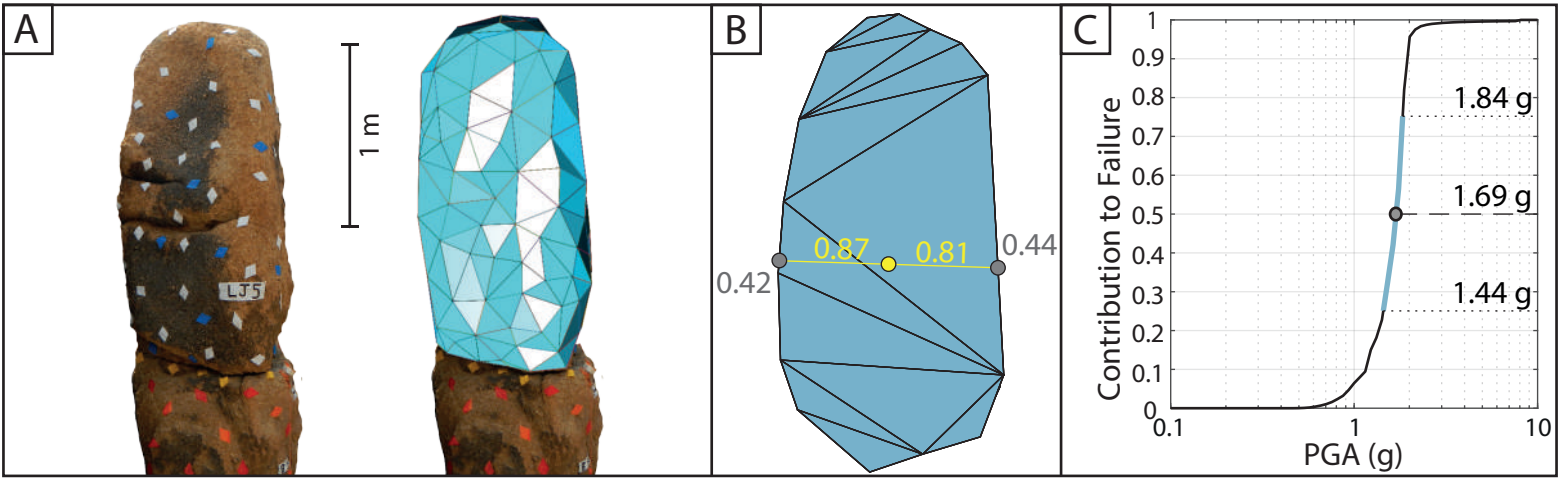

(A) LJ5 has extensive well-developed varnish on its surface, and the joints that bound the PBR align with the joints that bound the pedestal. We, therefore, have confidence that LJ5 was exhumed with its current geometry and since that time little post-exhumation erosion has occurred. (B) The two alternative methods of selecting  $\alpha_1$  and  $\alpha_2$  produce identical critical rocking points, therefore, we are confident that the basal area of LJ5 approximates the rectangular basal geometry that was described by the Purvance et al. (2008) fragility equations. However, its rocking response will be impeded by the outcrop in the direction of  $\alpha_2$ . In addition,  $\alpha_2$  is 1.05 times greater than  $\alpha_1$ , so LJ5 is classified as having a symmetric rocking response. LJ5 is the only PBR with a symmetric geometry that we studied.

## Fragility Age Results Figures

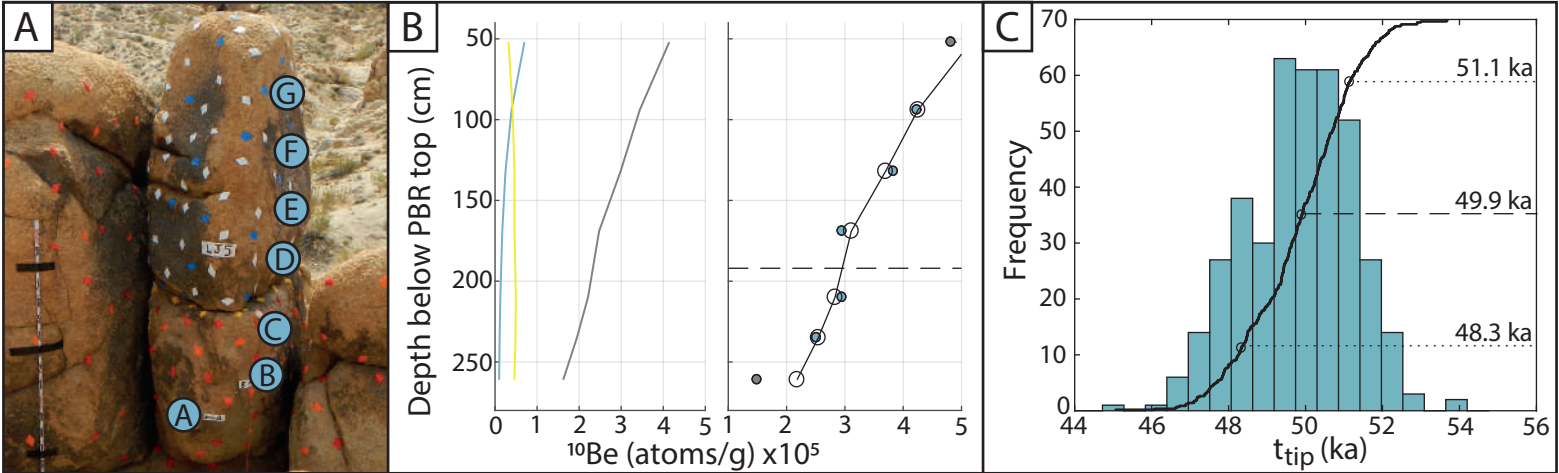

(A) Samples D - G are located on the PBR and samples A - C are located on the pedestal. (B) Sample A was excluded from the model fitting because field observations suggested that its position may have had a different exhumation history because it is located on a different side of the pedestal and adjacent to the modern saprolite surface. The overprediction of the modeled  $^{10}\text{Be}$  concentration in sample A would be consistent with this sample location being shielded by saprolite for some duration of time after the other samples were exhumed. LJ5 is the oldest PBR we studied and so has a large component of post-exhumation  $^{10}\text{Be}$  production (gray line). Low  $\epsilon_0$  erosion rates and an increased but still low  $\epsilon_1$  exhumation rate result in both pre-exhumation (blue line) and during-exhumation (yellow line)  $^{10}\text{Be}$  production.

## Hazard Validation Results Figures

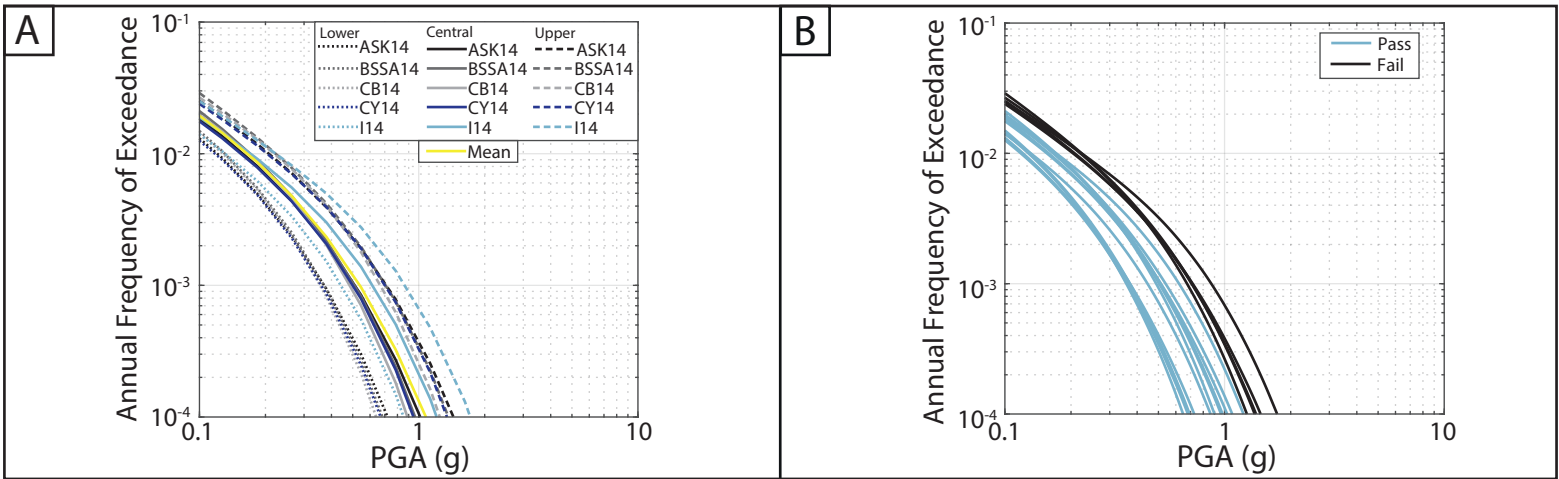

The dominant seismic source for the LJ5 site is the San Andreas fault. The combination of the old fragility age and relatively stable fragility of LJ5 causes the ground-motions estimated by the upper branches of all five GMMs to be inconsistent with a 5% probability of survival of LJ5. The removal of the I14 GMM, at 2475 year mean return period, reduces the mean ground-motion estimate by 3% and reduces the range of estimated 5th–95th fractile ground motions by 25% at the LJ5 site.

# LJB1

## Fragility Results Figures

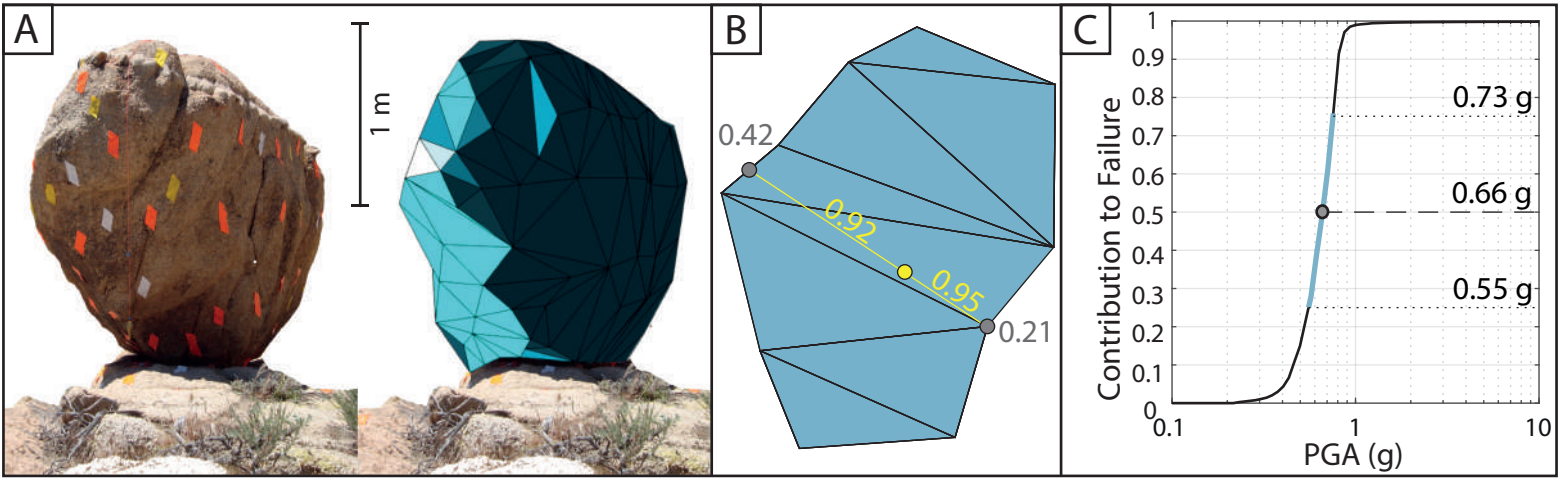

(A) The inclined dip of the pedestal, in the direction approximately perpendicular to the 2-D rocking direction of LJB1, suggests that sliding could be a potential failure mechanism of LJB1 in addition to rocking leading to toppling. (B) The two alternative methods of selecting  $\alpha_1$  and  $\alpha_2$  produce identical critical rocking points, therefore, we are confident that the basal area of LJB1 approximates the rectangular basal geometry that was described by the Purvance et al. (2008) fragility equations. In addition,  $\alpha_2$  is 2.00 times greater than  $\alpha_1$ , so LJB1 is classified as having an symmetric rocking response.

## Fragility Age Results Figures

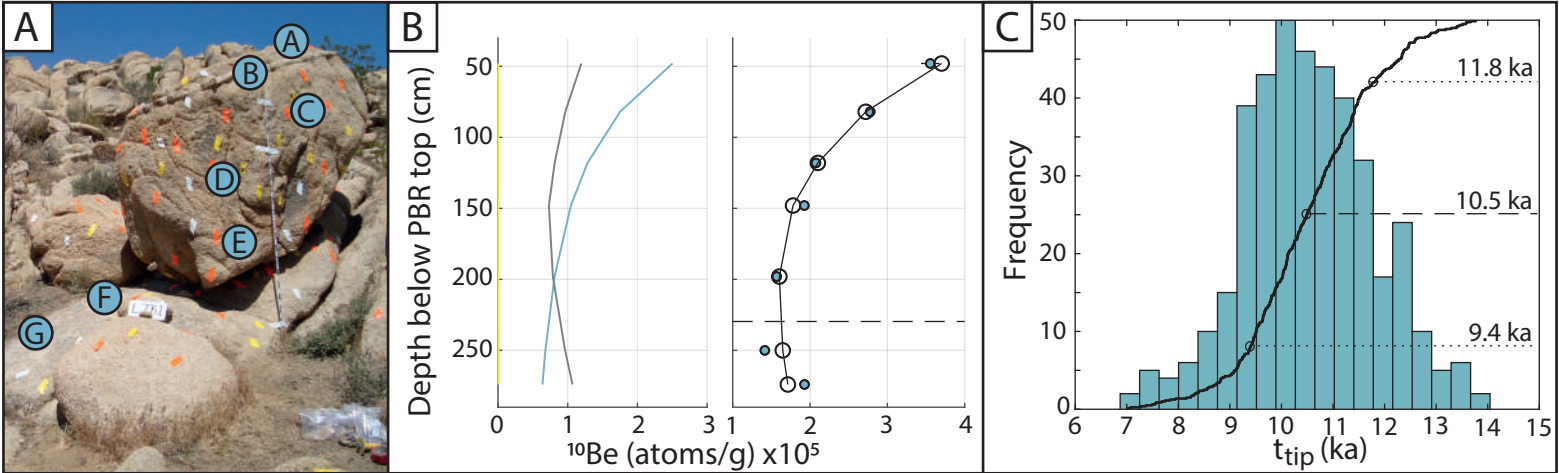

(A) Samples A - E are located on the PBR and samples F and G are located on the pedestal. (B) The modeled  $\epsilon_1$  erosion rate results in an instantaneous exhumation of LJB1, therefore, no  $^{10}\text{Be}$  production occurred during exhumation (yellow line). The higher measured  $^{10}\text{Be}$  concentration in sample G than in sample F suggests the potential recent removal of material that was shielding the location of sample F.

## Hazard Validation Results Figures

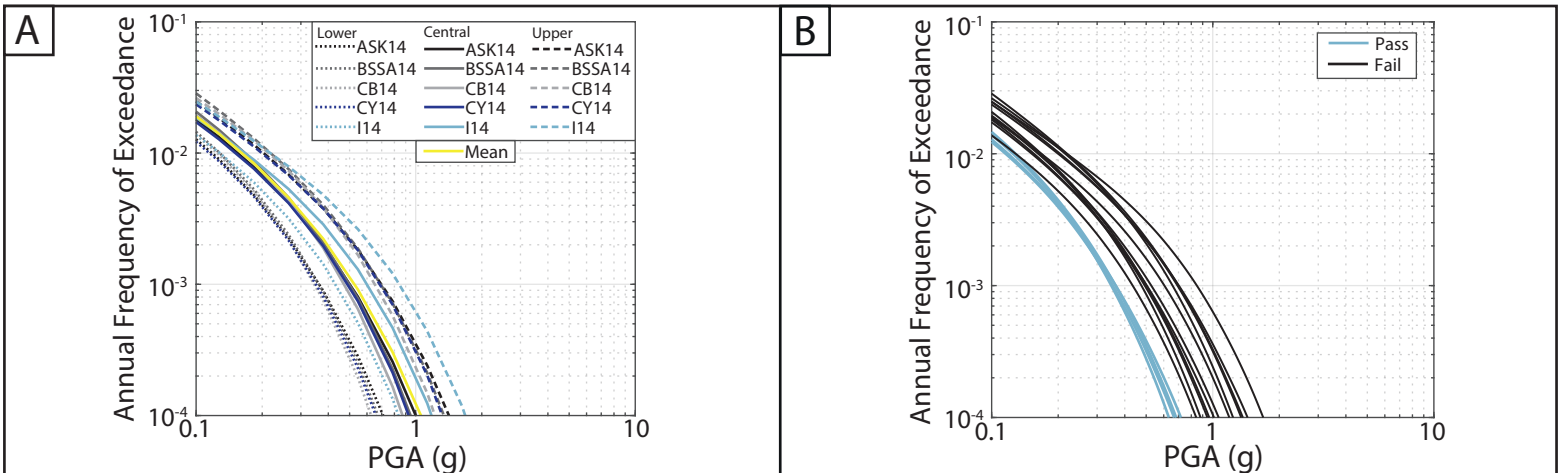

The dominant seismic source for the LJB1 site is the San Andreas fault. The combination of the moderate fragility age and relatively unstable fragility of LJB1 cause the upper and central branches of all five GMMs as well as the lower branch I14 to be inconsistent with a 5% probability of survival of LJB1. The removal of the I14 GMM, at 2475 year mean return period, reduces the mean ground-motion estimate by 3% and reduces the range of estimated 5th–95th fractile ground motions by 24% at the LJB1 site.



# LJB2

## Fragility Results Figures

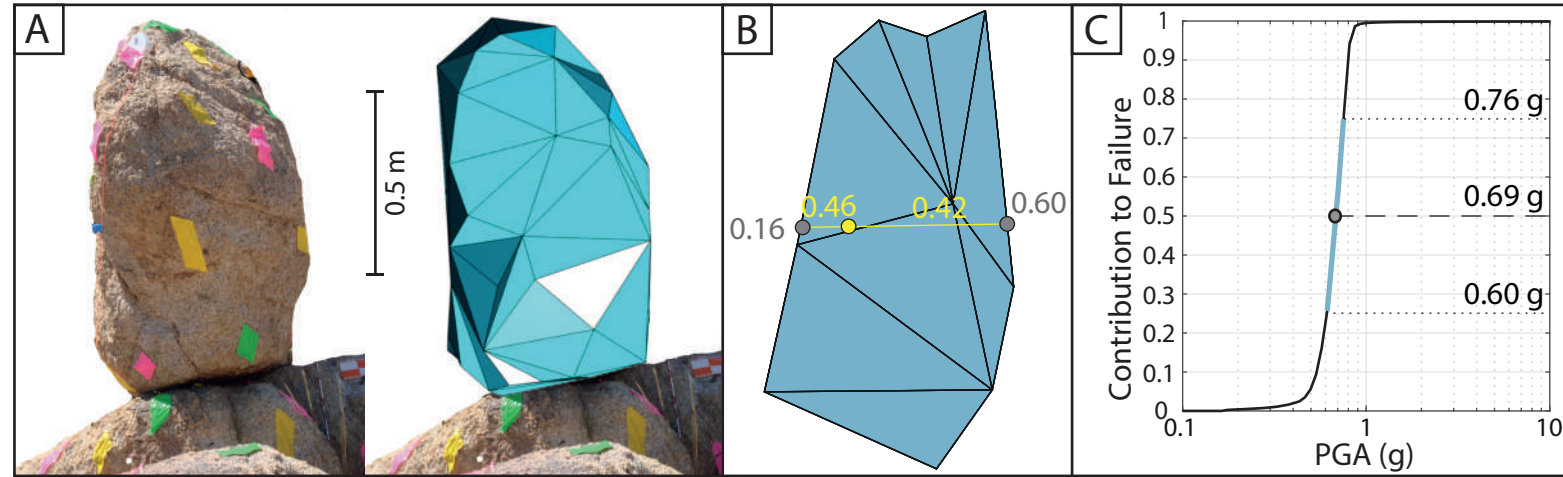

## Fragility Age Results Figures

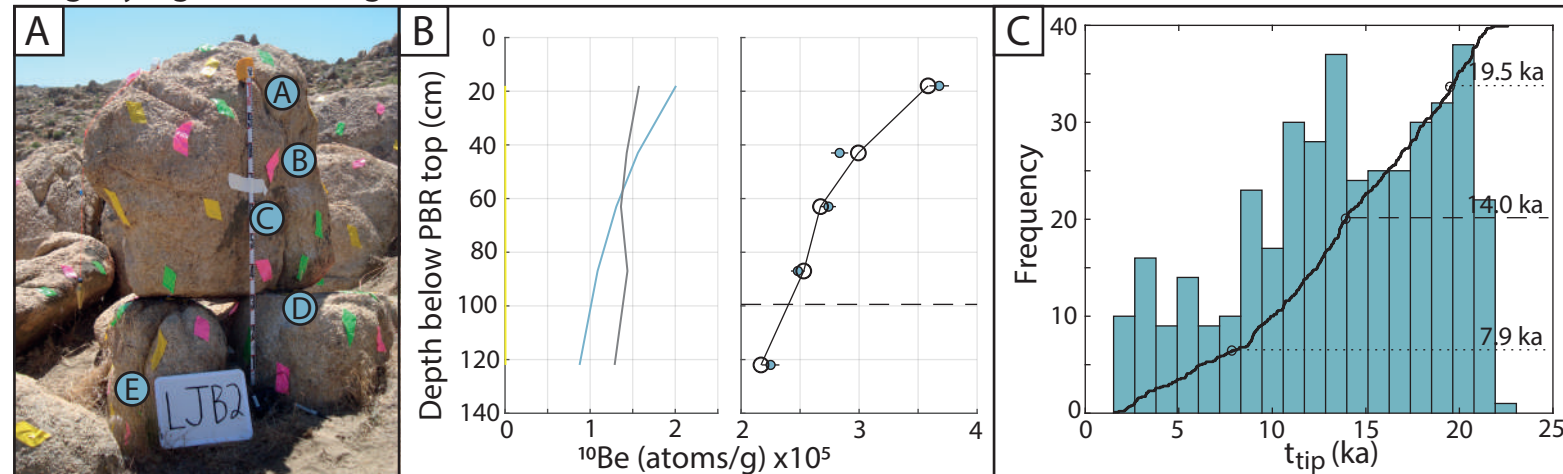

## Hazard Validation Results Figures

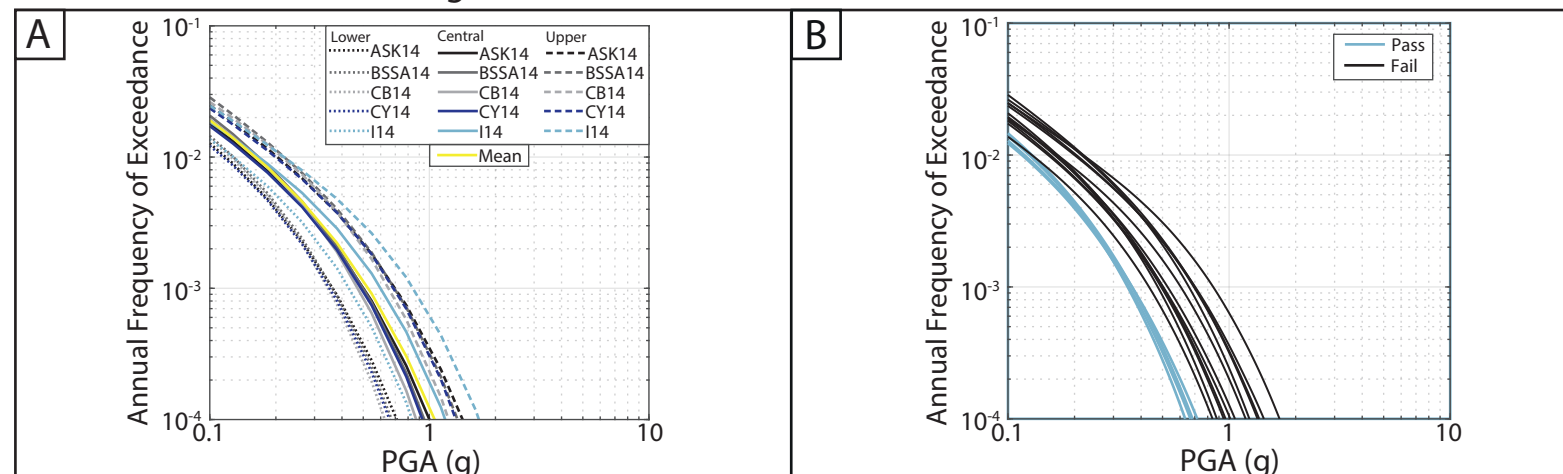

# MR1

## Fragility Results Figures

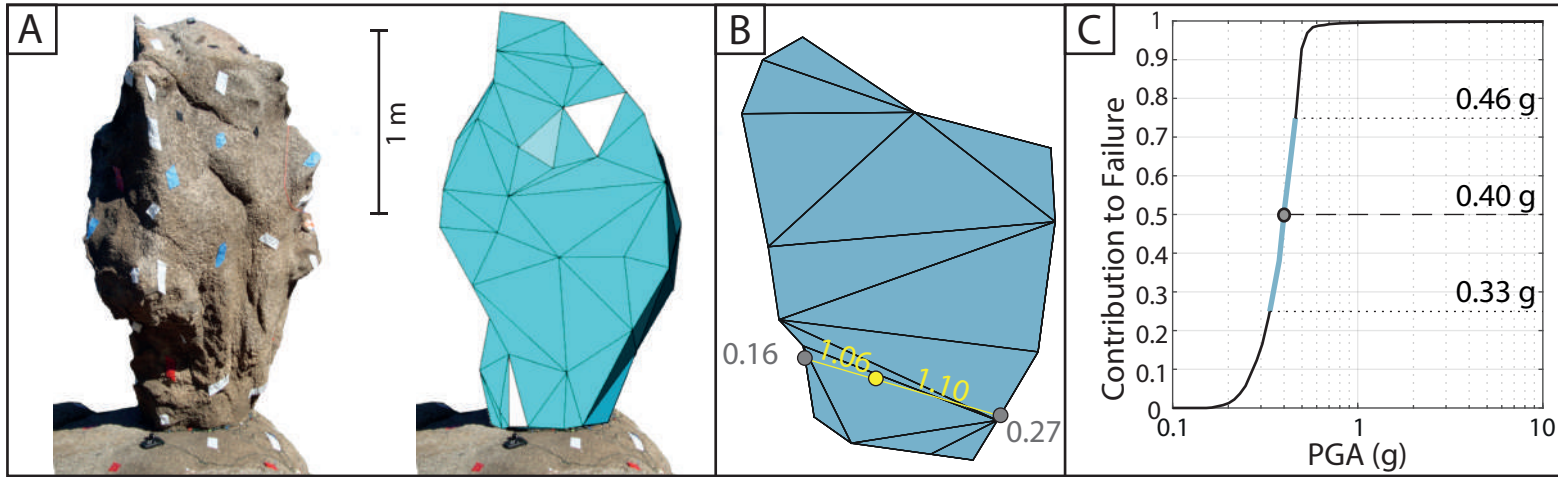

## Fragility Age Results Figures

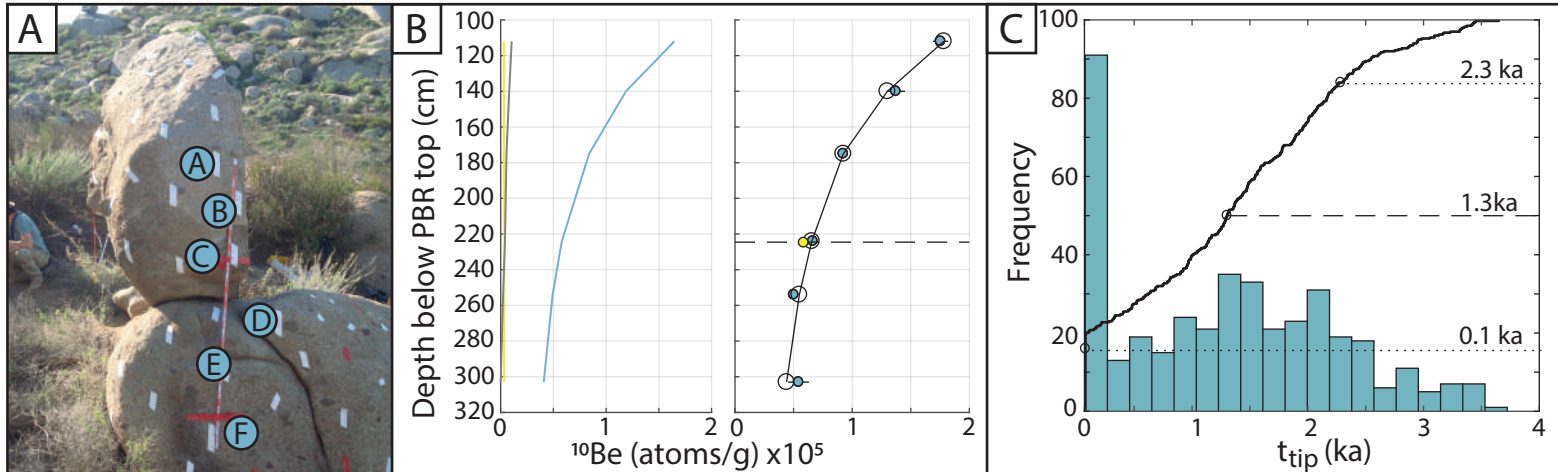

## Hazard Validation Results Figures

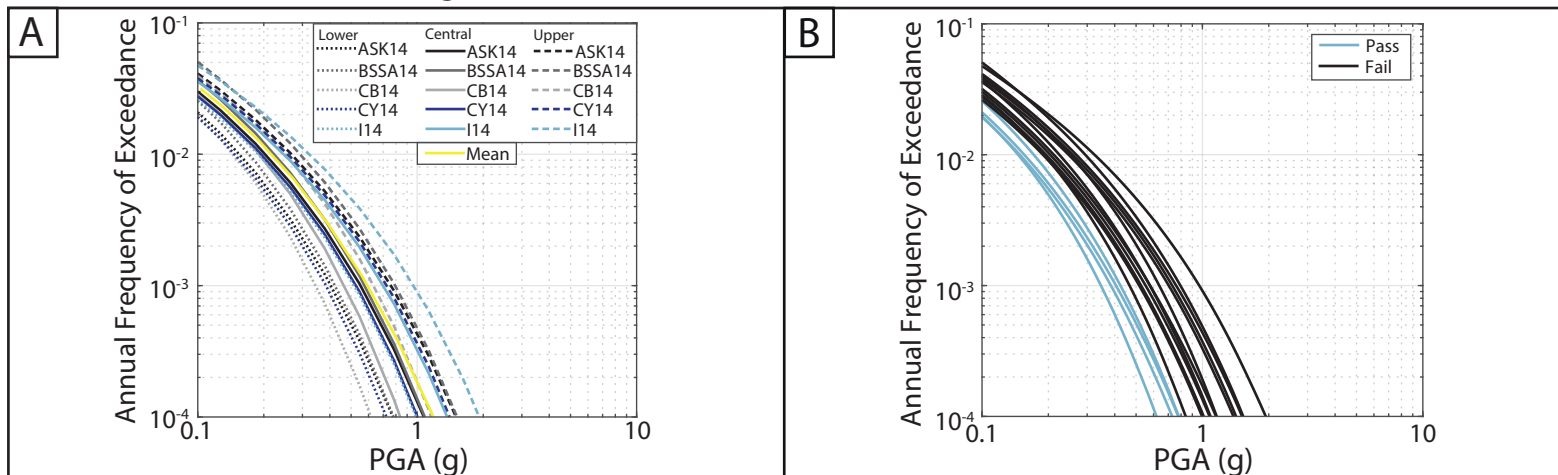

# PC1

## Fragility Results Figures

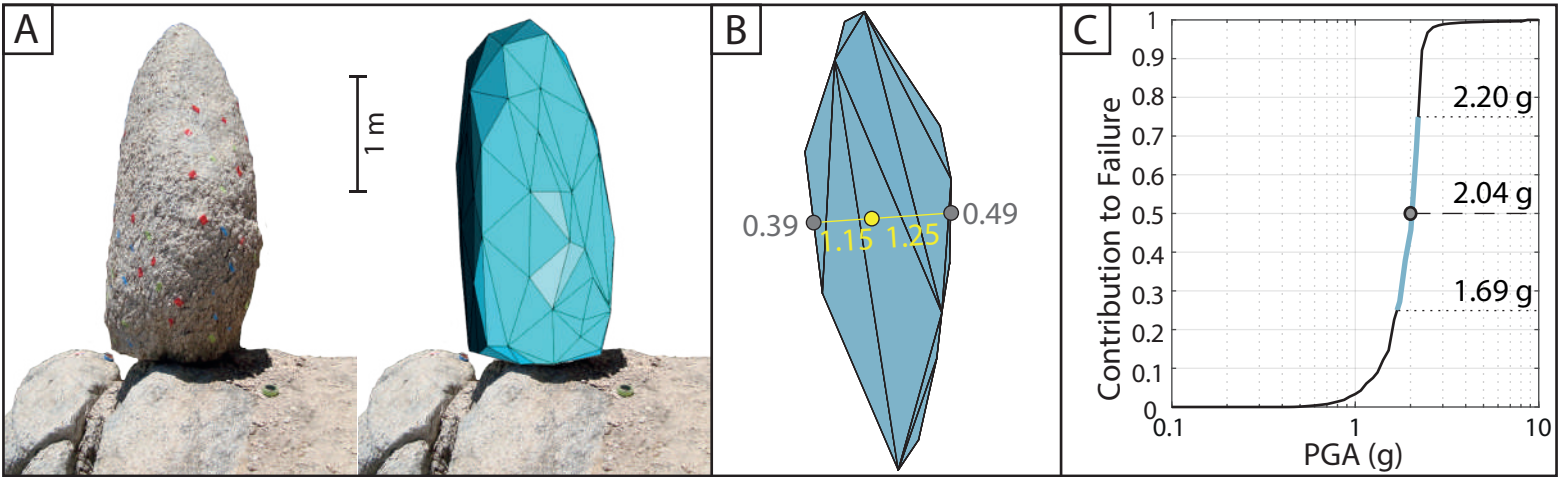

(A) PC1 and the surrounding outcrop show evidence of intense chemical weathering, which makes it much more susceptible to post-exhumation erosion. The rock-mass is easily disaggregated by hand. However, there is localized varnish and one side (left side in photo) is a planar surface that is formed by a joint that bounds the PBR and continues into the pedestal, which suggests limited post-exhumation erosion on some, but not all, PBR surfaces. (B) The two alternative methods of selecting  $\alpha_1$  and  $\alpha_2$  produce near identical values, therefore, we are confident that the basal area of PC1 approximates the rectangular basal geometry that was described by the Purvance et al. (2008) fragility equations.  $\alpha_2$  is 1.27 times greater than  $\alpha_1$ , so PC1 is classified as having an asymmetric rocking response.

## Fragility Age Results Figures

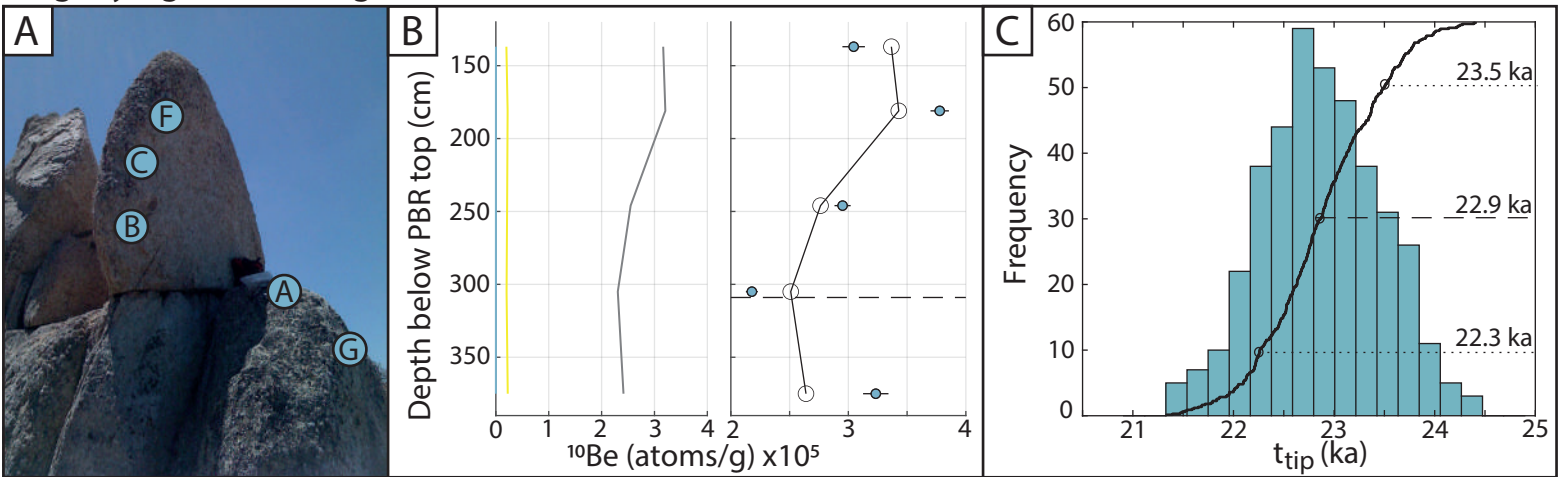

(A) Samples B, C, and F are located on the PBR and samples A and G are located on the pedestal. (B) Due to the dip of the PBR-pedestal contact, sample A is above the lowest point on the PBR-pedestal contact (horizontal dashed line). (C) The best-fitting free parameters have a high misfit ( $f_{val}$ ) and none of the measured  $^{10}\text{Be}$  concentrations overlap with the modeled concentrations. PC1 has an instantaneous best fit  $\epsilon_0$  value, which we believe suggest that the  $\epsilon_0$  signal has been completely removed during the  $\epsilon_1$  phase of exhumation, and so  $\epsilon_0$  is an unconstrained parameter for PC1. Alternatively, the occurrence of post-exhumation erosion would violate the assumptions of our geomorphic model, therefore, we cannot be confident in the modeled fragility age of PC1.

## Hazard Validation Results Figures

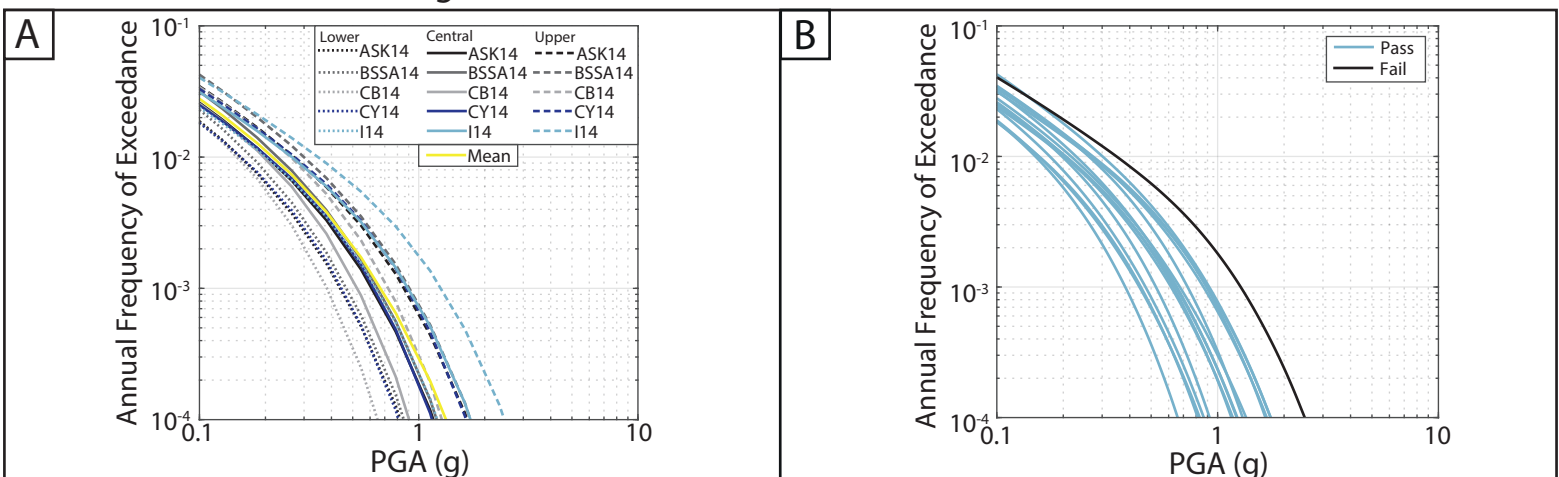

The dominant seismic source for the PC1 site is the San Andreas fault. The combination of the relatively old fragility age and relatively stable fragility of PC1 causes the ground-motions estimated by the upper branch of I14 to be inconsistent with a 5% probability of survival of PC1. The removal of the I14 GMM, at 2475 year mean return period, reduces the mean ground-motion estimate by 7% and reduces the range of estimated 5th–95th fractile ground motions by 36% at the PC1 site.



## Fragility Results Figures

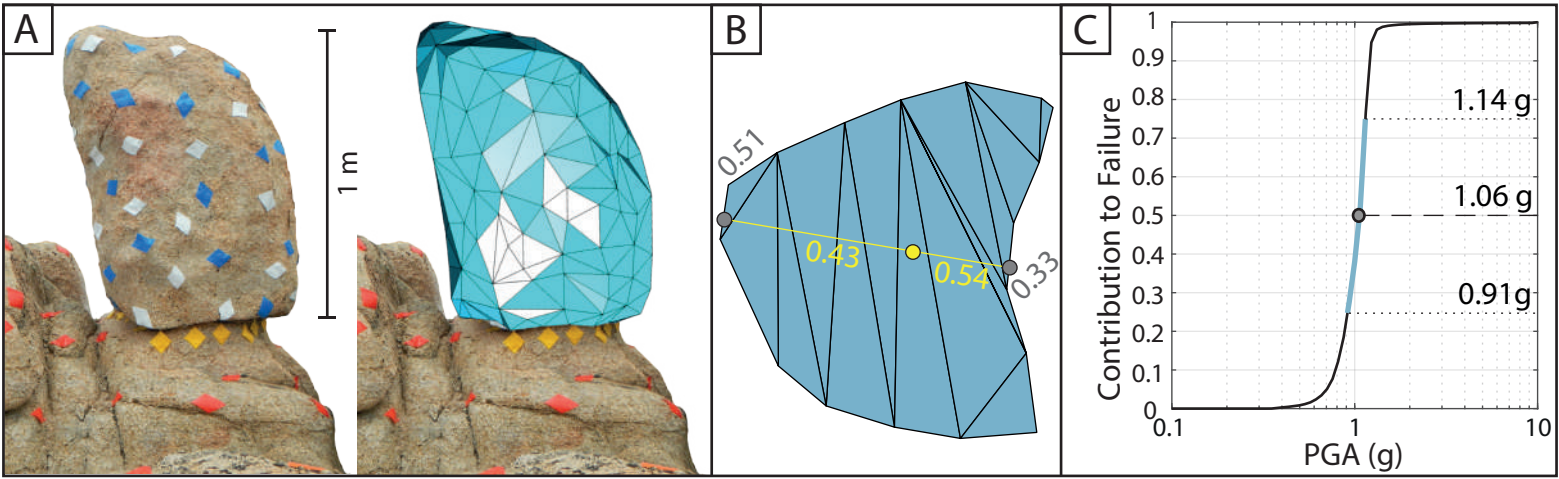

(A) PI1 is clearly bounded on all sides by joints that continue into the pedestal and surrounding outcrop, which indicates that the PBR was exhumed in its current geometry and that negligible post-exhumation erosion has occurred. (B) The two alternative methods of selecting  $\alpha_1$  and  $\alpha_2$  produce near identical values, therefore, we are confident that the basal area of PI1 approximates the rectangular basal geometry that was described by the Purvance et al. (2008) fragility equations. The fragility of PI1 is increased by the undercutting of the PBR base in the most fragile direction.  $\alpha_2$  is 1.54 times greater than  $\alpha_1$ , so PI1 is classified as having an asymmetric rocking response. However, the  $\alpha_2$  of PI1 is greater than the range investigated by Purvance et al. (2008), which reduces our confidence in the fragility characterization of PI1.

## Fragility Age Results Figures

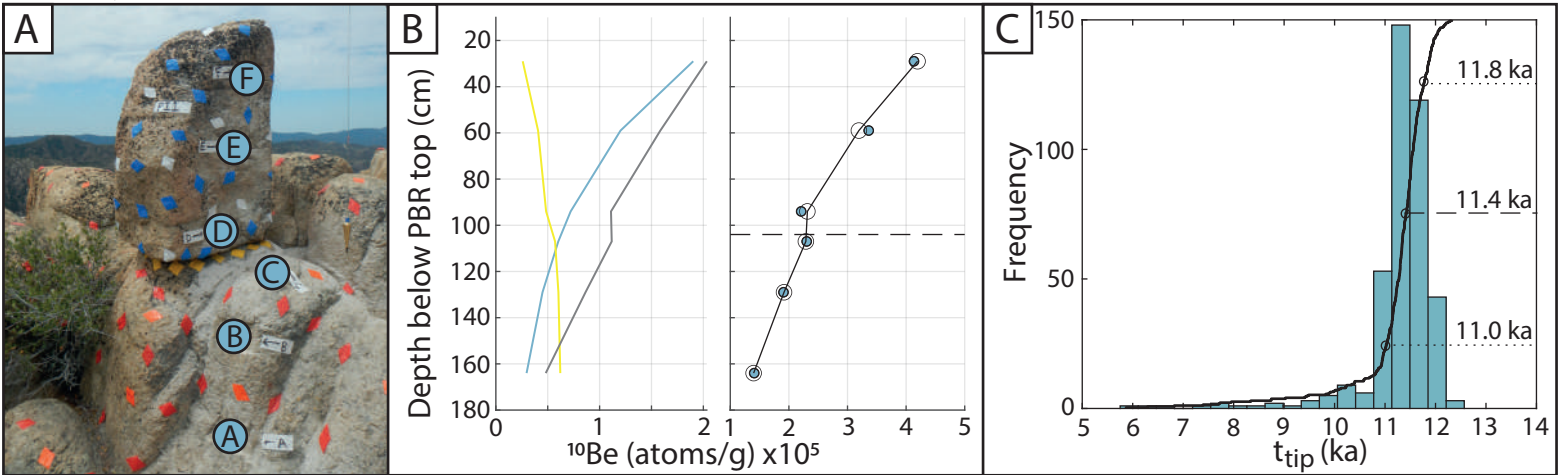

(A) Samples D - F are located on the PBR and samples A - C are located on the pedestal. (B) The low modeled  $\epsilon_0$  and higher, but still low,  $\epsilon_1$  result in  $^{10}\text{Be}$  accumulation both before and during exhumation (blue and yellow lines, respectively). The samples collected down two sides of the outcrop result in a distinctive change in shielding and, therefore, associated profile of post-exhumation  $^{10}\text{Be}$  production (gray line), between the two sides.

## Hazard Validation Results Figures

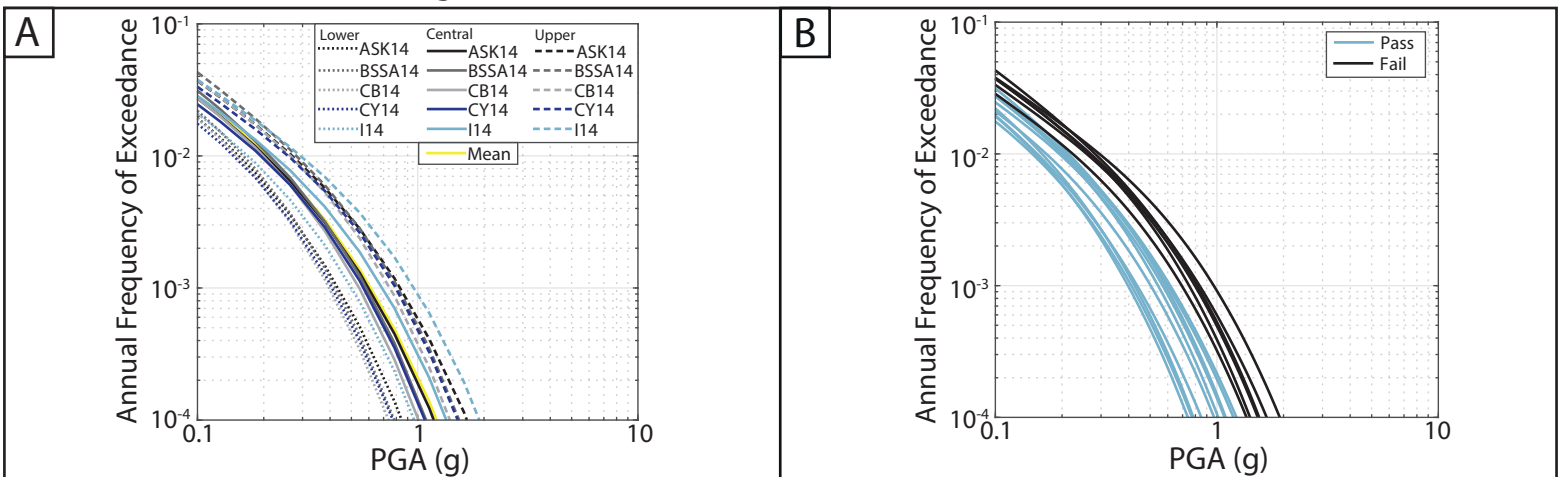

The dominant seismic sources at the PI1 site are the San Andreas fault, Cleghorn fault, San Jacinto fault, and North Frontal thrust faults. The combination of the moderate fragility age and moderate fragility of PI1 causes the ground-motions estimated by the upper branches of all five GMMs and the central branch of I14 to be inconsistent with a 5% probability of survival of PI1. The removal of the I14 GMM, at 2475 year mean return period, reduces the mean ground-motion estimate by 3% and reduces the range of estimated 5th–95th fractile ground motions by 17% at the PI1 site.

# PI2

## Fragility Results Figures

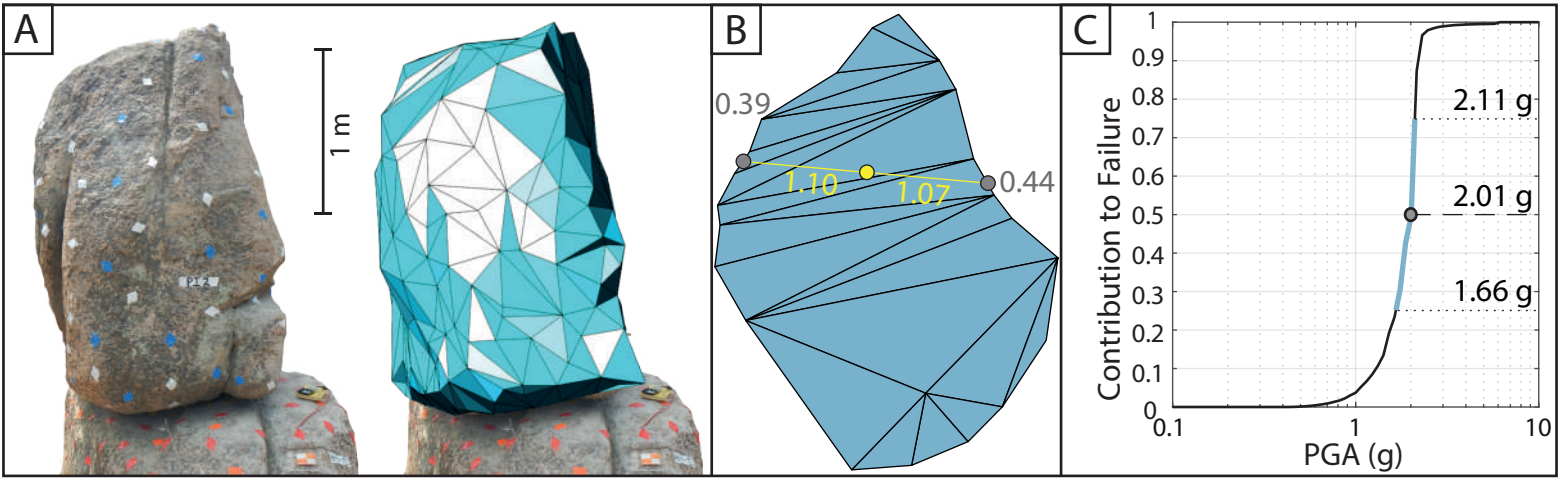

(A) PI2 is clearly bounded on all sides by joints that continue into the pedestal and surrounding outcrop, which indicates that the PBR was exhumed in its current geometry and that negligible post-exhumation erosion has occurred. (B) The two alternative methods of selecting  $\alpha_1$  and  $\alpha_2$  produce a moderate 13% and 18% difference, respectively. Therefore, we only have moderate confidence that the basal area of PI2 approximates the rectangular basal geometry that was described by the Purvance et al. (2008) fragility equations.  $\alpha_2$  is 1.15 times greater than  $\alpha_1$ , so PI2 is classified as having an asymmetric rocking response.

## Fragility Age Results Figures

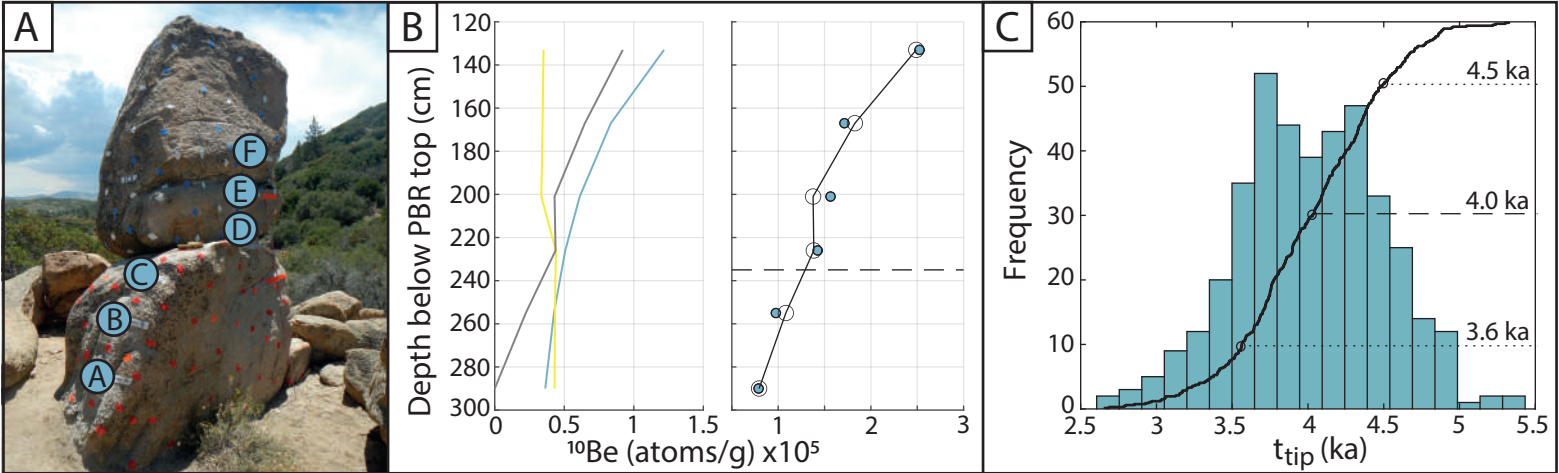

(A) Samples D - F are located on the PBR, and samples A - C are located on the pedestal. Due to the dip of the pedestal, sample C is above the lowest point on the PBR-pedestal contact. (B) The samples collected down two sides of the outcrop result in a distinctive change in shielding and, therefore, associated profile of post-exhumation  $^{10}\text{Be}$  production (gray line), between the two sides. The low modeled  $\epsilon_0$  and higher, but still low,  $\epsilon_1$  result in  $^{10}\text{Be}$  accumulation both before and during exhumation (blue and yellow lines, respectively).

## Hazard Validation Results Figures

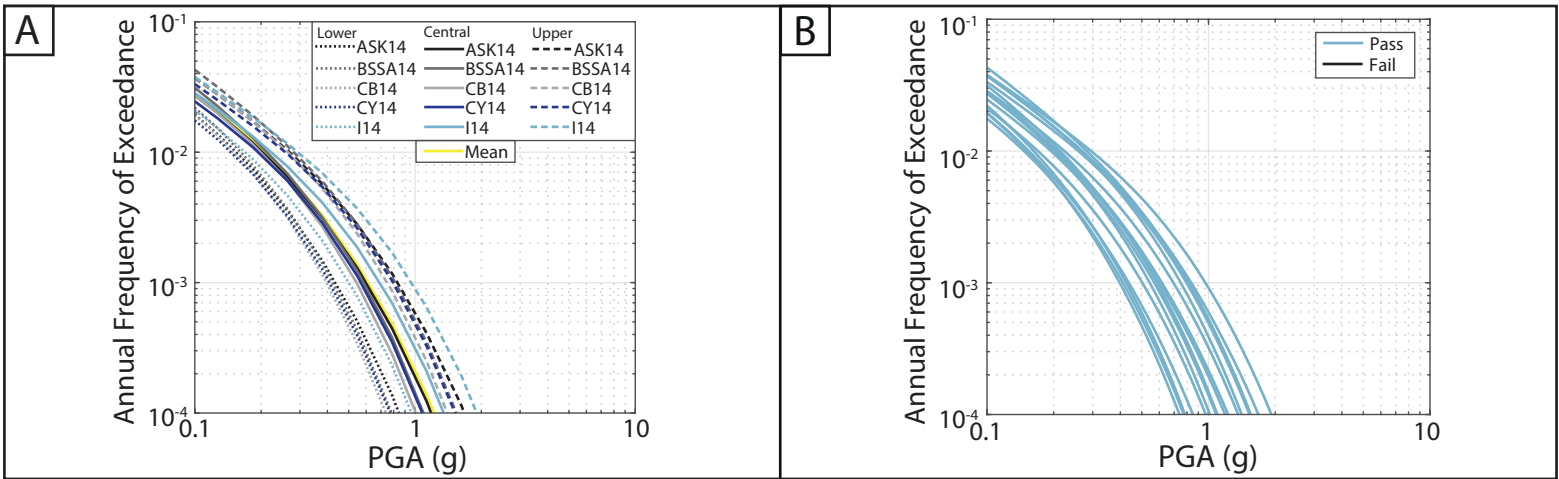

The dominant seismic sources at the PI2 site are the San Andreas fault, Cleghorn fault, San Jacinto fault, and North Frontal thrust faults. The combination of the young fragility age and moderate fragility of PI2 cause none of the three branches (upper, central, and lower) of all five GMMs to be inconsistent with a 5% probability of survival of PI2. The removal of the I14 GMM, at 2475 year mean return period, reduces the mean ground-motion estimate by 3% and reduces the range of estimated 5th–95th fractile ground motions by 18% at the PI2 site.



# PNT01

## Fragility Results Figures

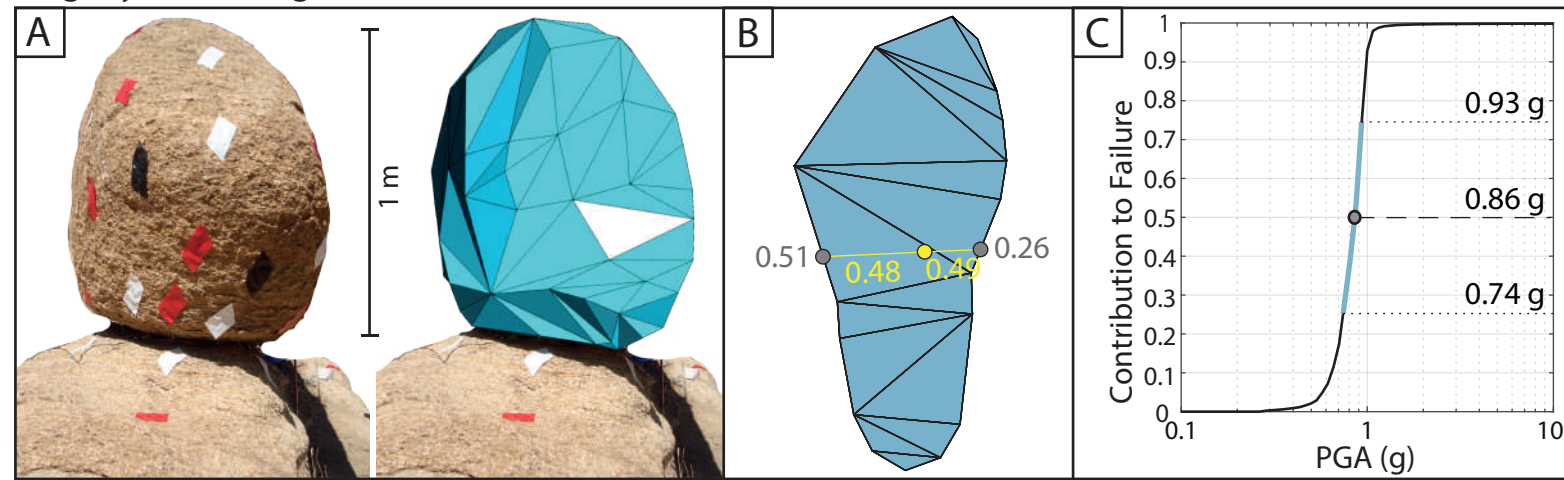

## Fragility Age Results Figures

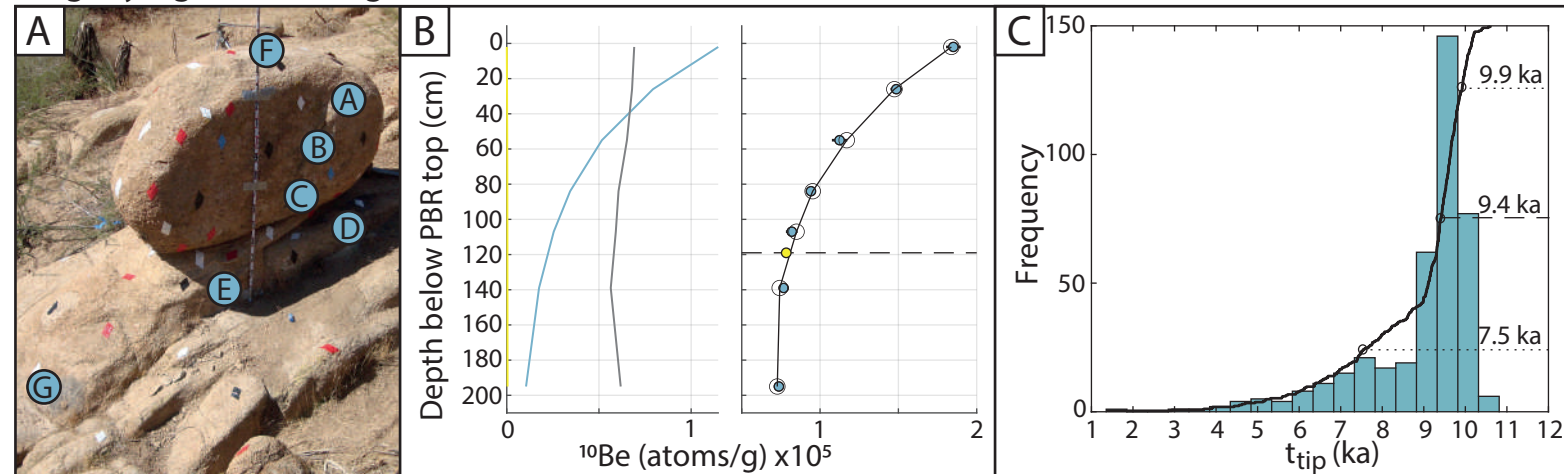

## Hazard Validation Results Figures

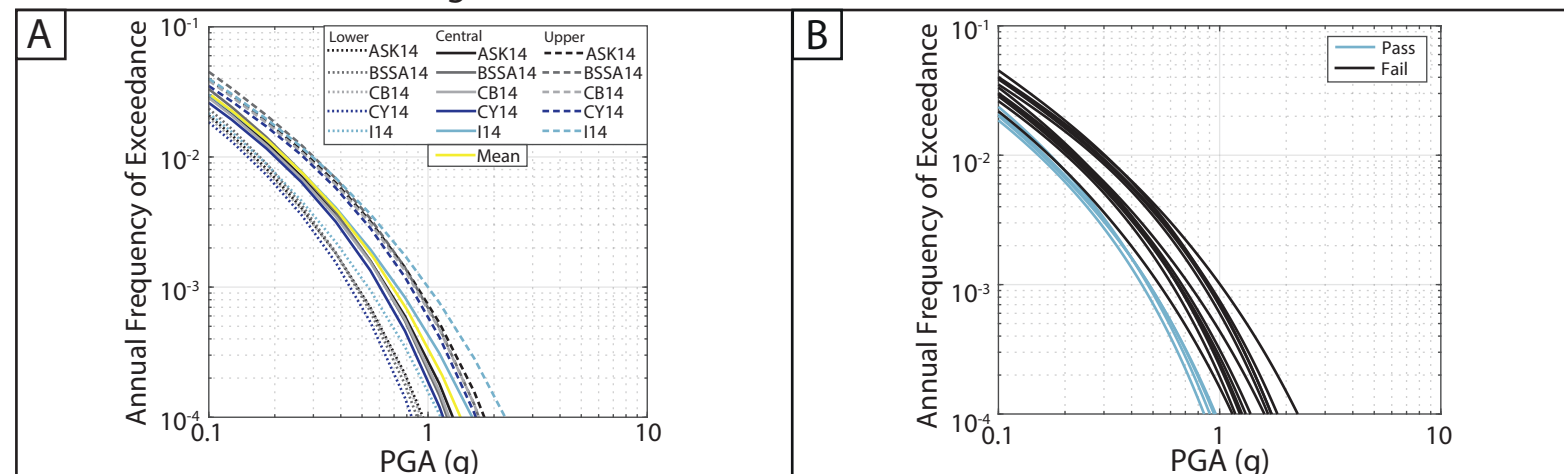



## Fragility Results Figures

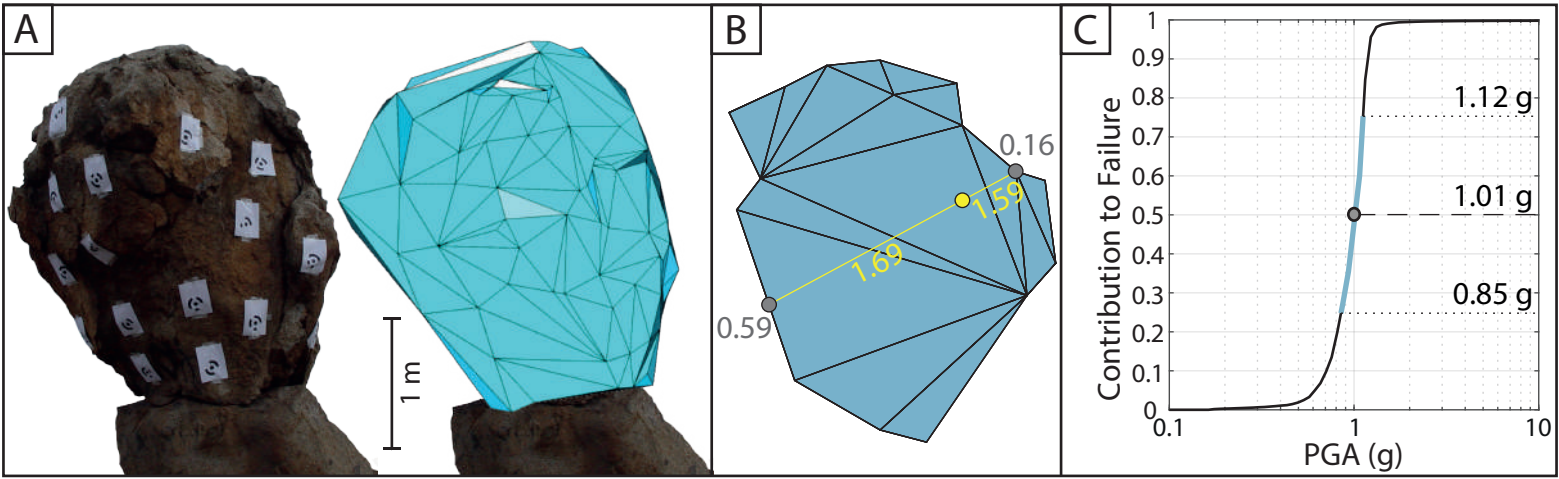

(A) Field observations of PP1 suggested that it experienced post-exhumation erosion, i.e., spalling, of previously case hardened rock surfaces, which together suggest a long period of negligible post-exhumation erosion followed by a more recent period of post-exhumation erosion. (B) The two alternative methods of selecting  $\alpha_1$  and  $\alpha_2$  produce a minor 6% and 7% difference, respectively. Therefore, we only have moderate confidence that the basal area of PP1 approximates the rectangular basal geometry that was described by the Purvance et al. (2008) fragility equations. In addition, the  $\alpha_2$  of PP1 is greater than the range investigated by Purvance et al. (2008), which further reduces our confidence in the fragility characterization of PP1.  $\alpha_2$  is 3.60 times greater than  $\alpha_1$ , so PP1 is classified as having an asymmetric rocking response.

## Fragility Age Results Figures

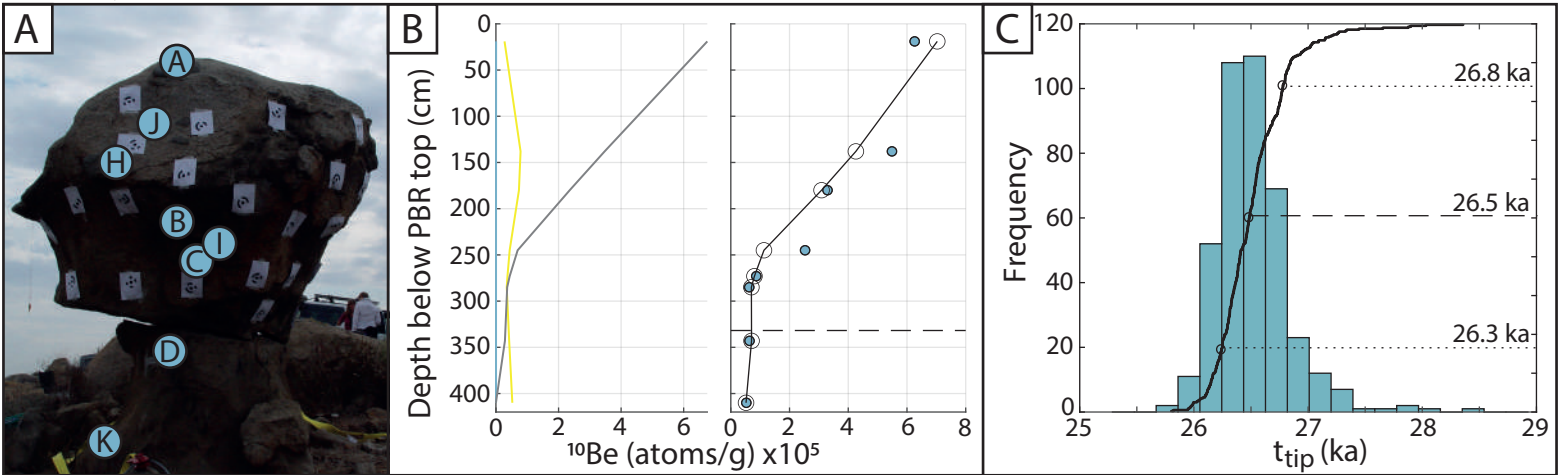

(A) Samples A - C and H - J are located on the PBR, and samples D and K are located on the pedestal. The samples were collected from PP1 after it was toppled during a housing development construction project, and the sample locations had to be reconstructed onto the 3-D model constructed from pre-toppling photos. (B) We suggest that post-exhumation erosion could be responsible for the poor fit of measured to modeled  $^{10}\text{Be}$  concentrations. However, fitting the model using only the four lowest samples, i.e., 2 samples above and 2 samples below the PBR-pedestal contact, yields the same tip fragility age. PP1 has an instantaneous best fit  $\epsilon_0$  value, which we believe suggests that the  $\epsilon_0$  signal has been completely removed during the  $\epsilon_1$  phase of exhumation and so  $\epsilon_0$  is an unconstrained parameter for PP1. Alternatively, the occurrence of post-exhumation erosion would violate the assumptions of our geomorphic model, therefore, we cannot be confident in the modeled fragility age of PP1.

## Hazard Validation Results Figures

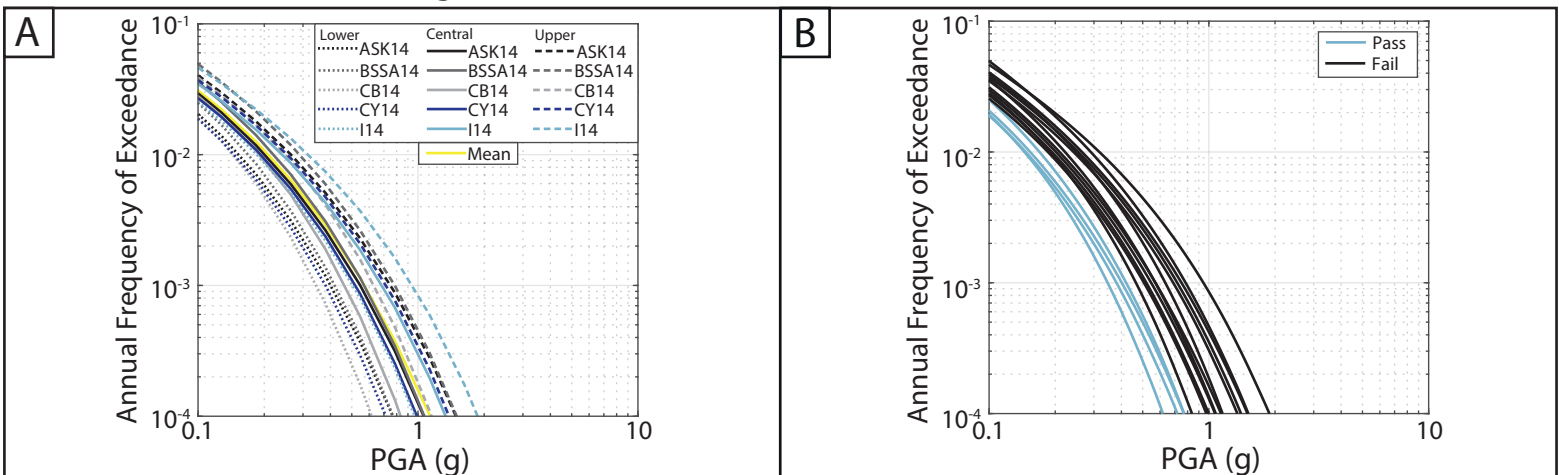

PP1 is located between the San Jacinto and Elsinore faults, which are the dominant seismic sources controlling the seismicity at the site. The old fragility age and unstable fragility of PP1 cause the upper and central branches of all five GMMs as well as the lower branch I14 to be inconsistent with a 5% probability of survival of PP1. The removal of the I14 GMM, at 2475 year mean return period, reduces the mean ground-motion estimate by 5% and reduces the range of estimated 5th-95th fractile ground motions by 24% at the PP1 site.

# RT1

## Fragility Results Figures

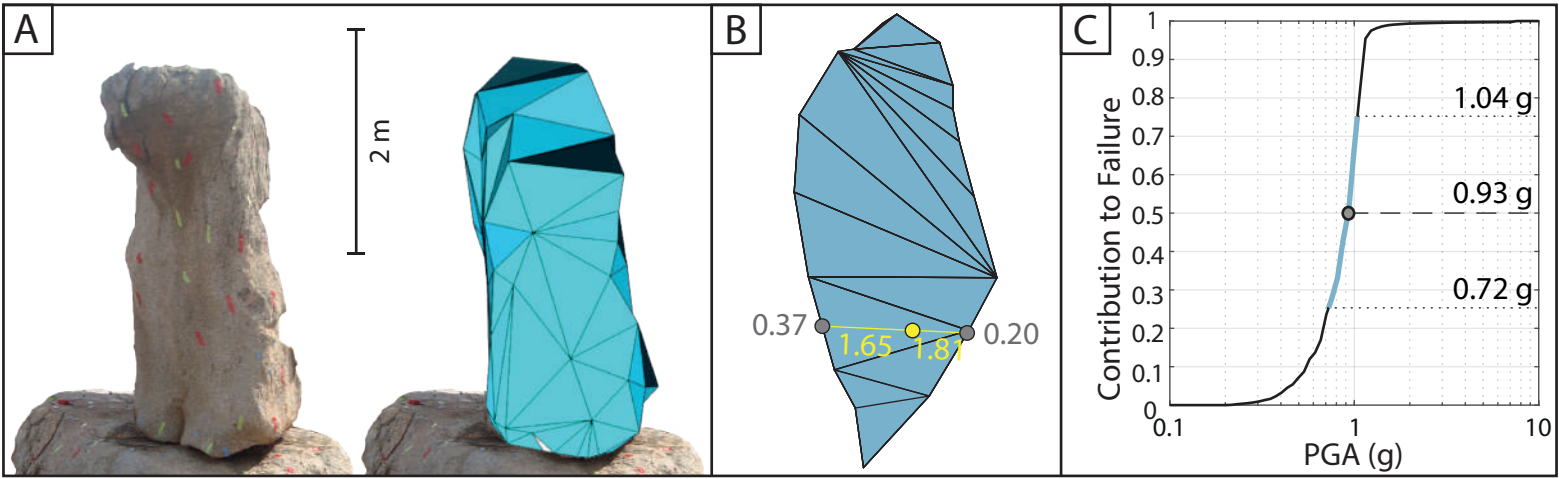

(A) RT1 was the PBR studied by Hall et al. (2019), who concluded that it had been exhumed with its current geometry and that since exhumation little weathering has occurred to the PBR. (B) The two alternative methods of selecting  $\alpha_1$  and  $\alpha_2$  produce a significant 13% and 25% difference, respectively. Therefore, we only have moderate confidence that the basal area of RT1 approximates the rectangular basal geometry that was described by the Purvance et al. (2008) fragility equations.  $\alpha_2$  is 1.83 times greater than  $\alpha_1$ , so RT1 is classified as having an asymmetric rocking response.

## Fragility Age Results Figures

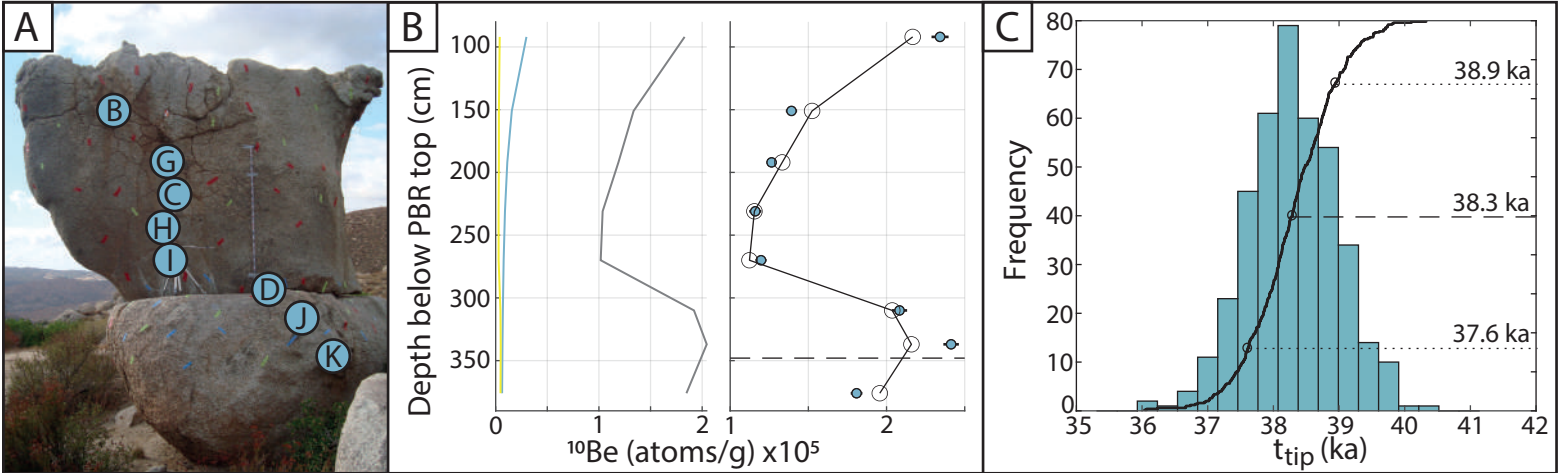

(A) Samples B, C, and G - I are located on the PBR, and samples J and K are located on the pedestal. Due to the dip of the PBR-pedestal contact, samples D and J are above the lowest point on the PBR-pedestal contact. (B) RT1 is modeled to have been exhumed by a rapid  $\epsilon_1$ , therefore, negligible  $^{10}\text{Be}$  accumulation occurred during exhumation (yellow line). We suggest that the poor model fitting to the lowest three samples is due to the large height of RT1 and so the increased likelihood of violating our model assumption that the full range of sample heights was exhumed during a single pulse of erosion at a constant rate.

## Hazard Validation Results Figures

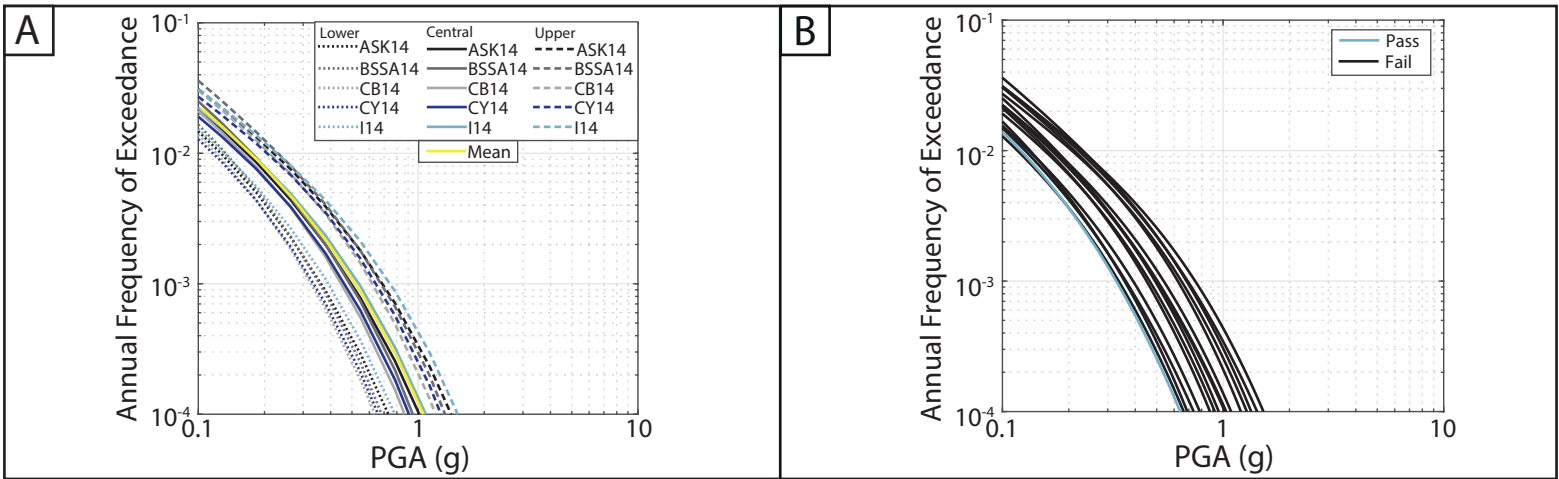

RT1 is located between the San Jacinto and Elsinore faults, which are the dominant seismic sources controlling the seismicity at the site. The old fragility age and unstable fragility of RT1 cause the upper and central branches of all five GMMs and the lower branches of ASK14, BSSA14, CY14, and I14 to be inconsistent with a 5% probability of survival of RT1. The removal of the I14 GMM, at 2475 year mean return period, reduces the mean ground-motion estimate by 2% and reduces the range of estimated 5th–95th fractile ground motions by 10% at the RT1 site.



## Fragility Results Figures

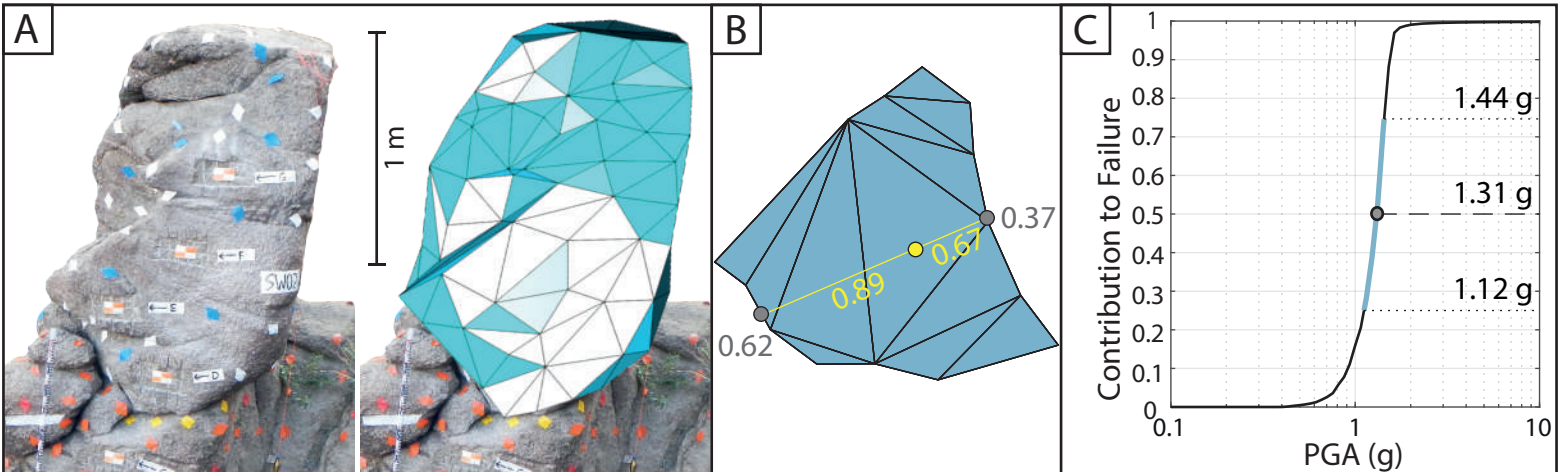

(A) SW02 is clearly bounded on all sides by joints that continue into the pedestal and surrounding outcrop. (B) The two alternative methods of selecting  $\alpha_1$  and  $\alpha_2$  produce a minor 1% and moderate 11% difference, respectively. Therefore, we have moderate confidence that the basal area of SW02 approximates the rectangular basal geometry that was described by the Purvance et al. (2008) fragility equations. In addition, the  $\alpha_2$  of SW02 is greater than the range investigated by Purvance et al. (2008), which further reduces our confidence in the fragility characterization of SW02.  $\alpha_2$  is 1.68 times greater than  $\alpha_1$ , so SW02 is classified as having an asymmetric rocking response.

## Fragility Age Results Figures

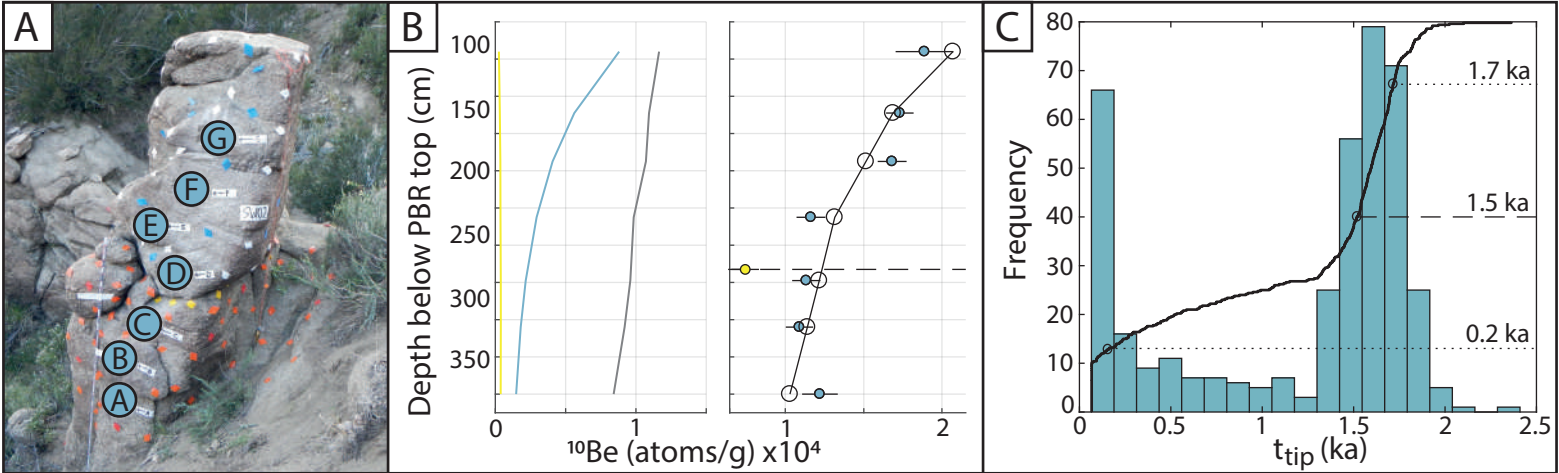

(A) Samples D - G are located on the PBR, and samples A - C are located on the pedestal. (B) The low measured  $^{10}\text{Be}$  concentrations relate to a young fragility age. The best fit  $\epsilon_1$  suggests rapid exhumation, which is plausible considering the location of the PBR in the center of a steep stream channel. The saprolite sample was collected  $\sim 2$  m from the PBR at approximately the height of the PBR-pedestal contact. All the measured  $^{10}\text{Be}$  accumulated in the saprolite sample (yellow circle) was produced during post- $\epsilon_1$  exposure due to the modeled instantaneous  $\epsilon_1$  value. We calculated an exposure age of  $937 \pm 80$  years for the saprolite sample, assuming zero erosion and no inheritance. This age overlaps within the uncertainties on the  $t_{\text{tip}}$  age of SW02. This agreement in ages validates our geomorphic model that the rapid saprolite erosion that exhumed the PBR,  $\epsilon_1$ , abruptly stopped at the present ground surface level, and since that time has been accumulating  $^{10}\text{Be}$  at a negligible erosion rate.

## Hazard Validation Results Figures

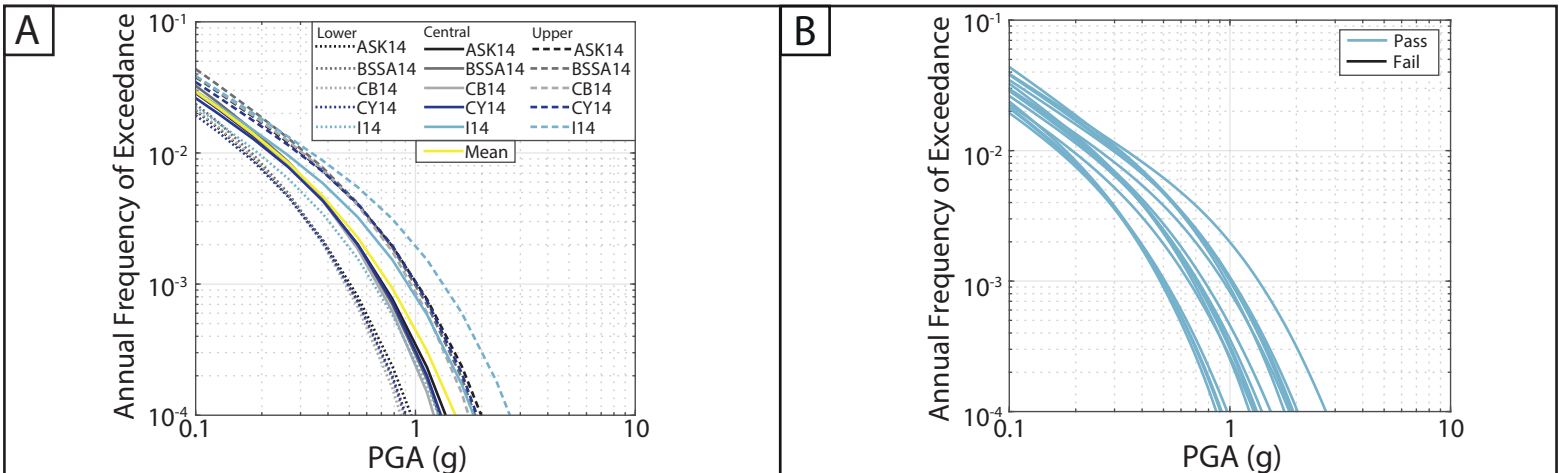

The dominant seismic sources at the SW02 site are the San Andreas fault, Cleghorn fault, San Jacinto fault, and North Frontal thrust faults. The combination of the young fragility age and stable fragility of SW02 cause none of the three branches (upper, central, and lower) of all five GMMs to be inconsistent with a 5% probability of survival of SW02. The removal of the I14 GMM, at 2475 year mean return period, reduces the mean ground-motion estimate by 5% and reduces the range of estimated 5th-95th fractile ground motions by 33% at the SW02 site.



# UCR1

## Fragility Results Figures

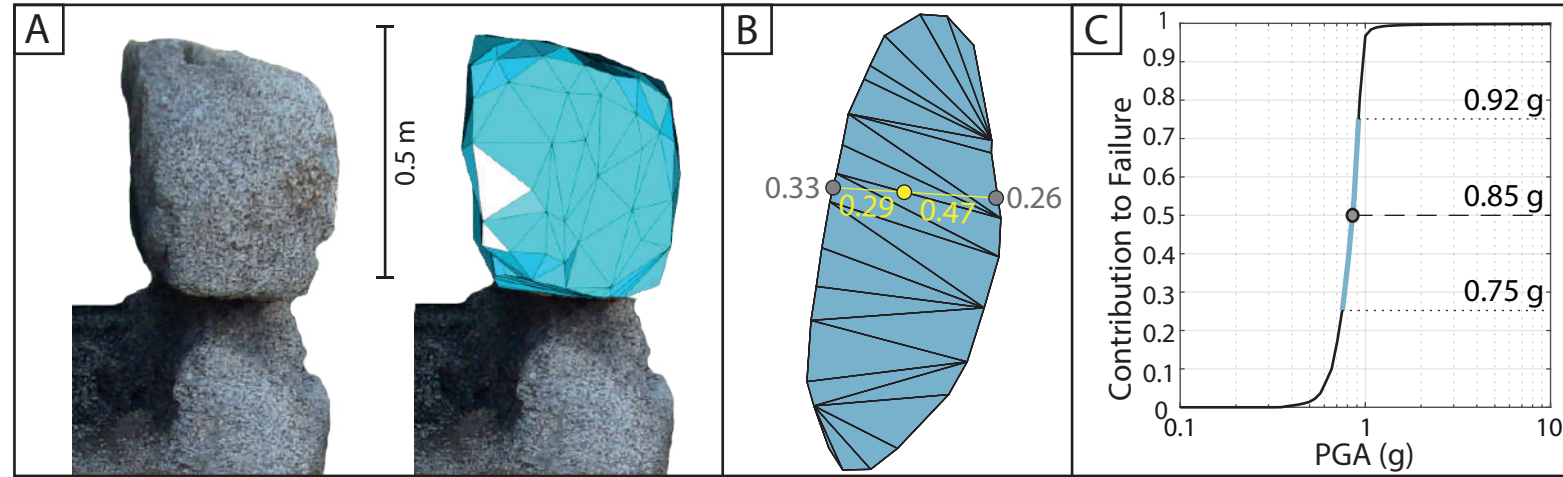

(A) The geometry of UCR1 is well defined on one side by a joint surface (left side in photo), which suggests limited erosion on one side of the PBR. (B) The two alternative methods of selecting  $\alpha_1$  and  $\alpha_2$  produce a minor 2% and 8% difference, respectively. Therefore, we have moderate confidence that the basal area of UCR1 approximates the rectangular basal geometry that was described by the Purvance et al. (2008) fragility equations.  $\alpha_2$  is 1.43 times greater than  $\alpha_1$ , so UCR1 is classified as having an asymmetric rocking response.

## Fragility Age Results Figures

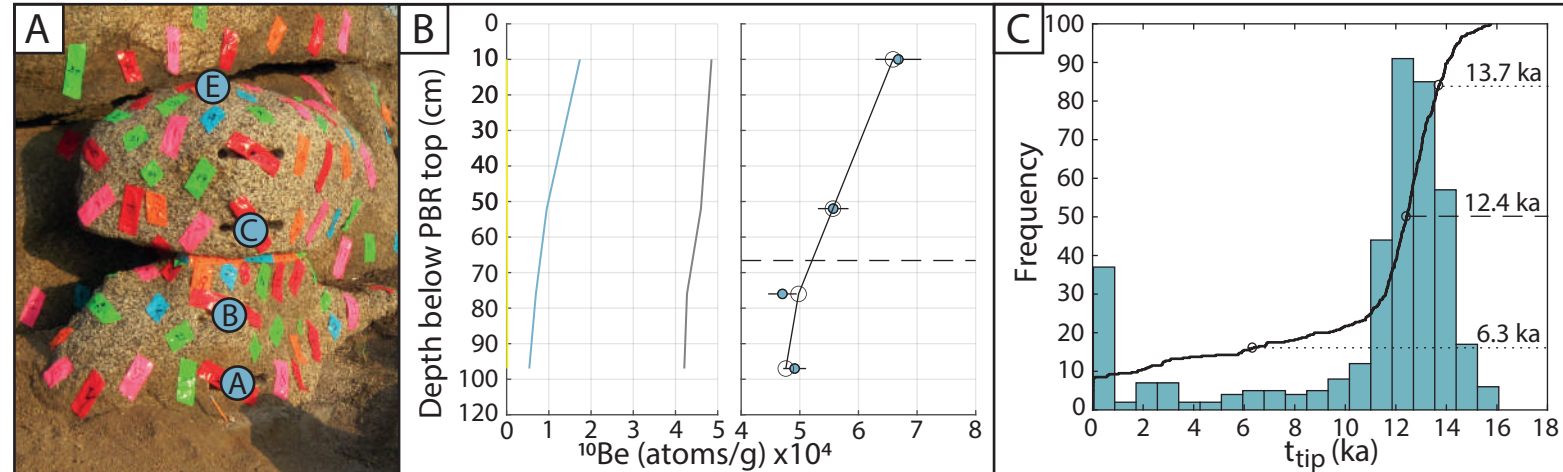

(A) Samples C and E are located on the PBR, and samples A and B are located on the pedestal. (B) Of the PBRs in this study, the fewest samples over the shortest height range were collected from UCR1. However, we demonstrate that our fragility age model is able to produce a good model fit to even only 4 measured samples collected over ~1 m of height. (C) We suggest that both the limited height over which to model the  $^{10}\text{Be}$  data and the narrow range of shielding factors due to the small distance between samples resulted in a non-unique solution and, therefore, the lack of a clear tip histogram peak.

## Hazard Validation Results Figures

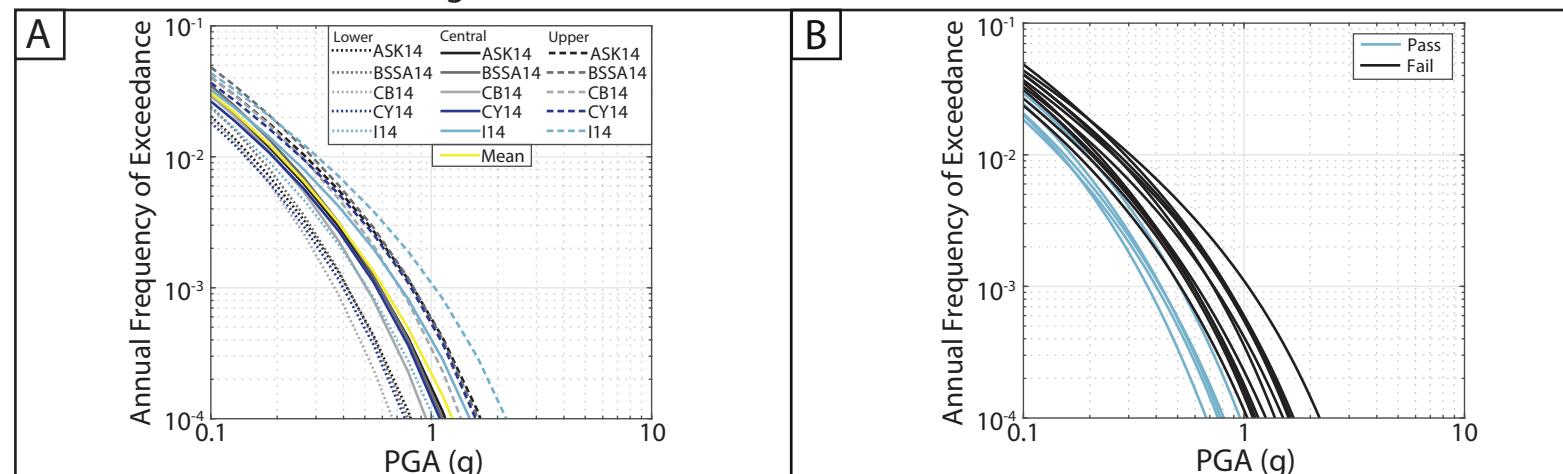

UCR1 is located between the San Jacinto and Elsinore faults, which are the dominant seismic sources controlling the seismicity at the site. The young fragility age and relatively unstable fragility of UCR1 cause the upper branches of all five GMMs, the central branches of ASK14, BSSA14, CY14, and I14 and the lower branch of I14 to be inconsistent with a 5% probability of survival of UCR1. The removal of the I14 GMM, at 2475 year mean return period, reduces the mean ground-motion estimate by 4% and reduces the range of estimated 5th–95th fractile ground motions by 26% at the UCR1 site.

## Fragility Results Figures

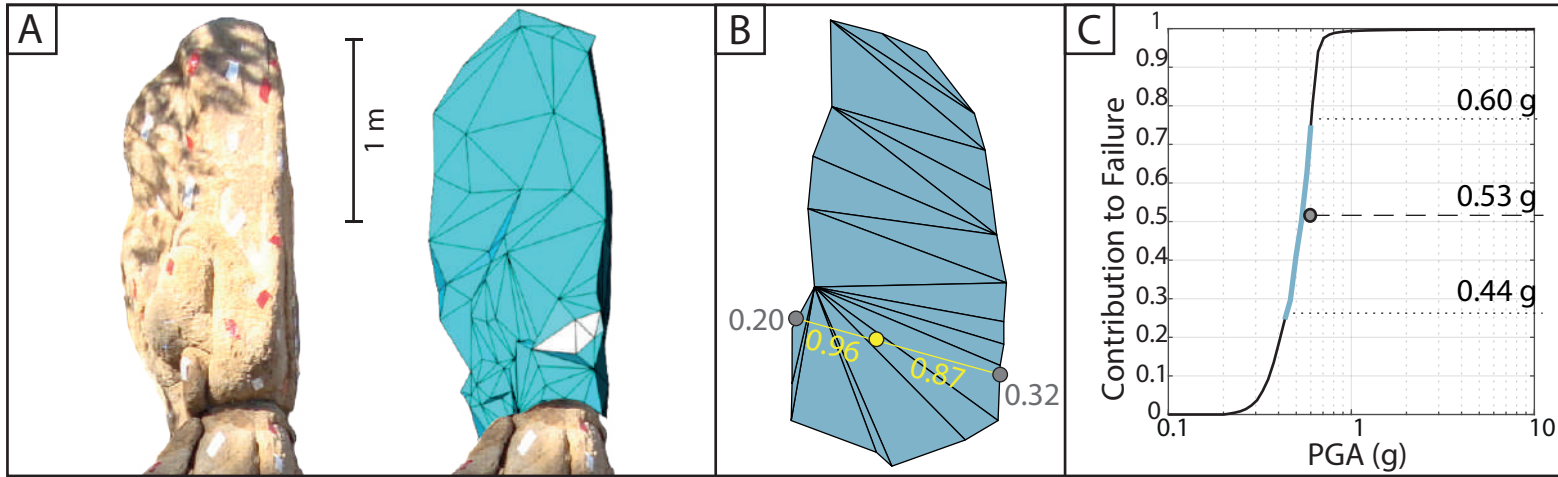

(A) The geometry of YV1 is well defined on one side by a joint surface (right side in photo), which suggests limited erosion on one side of the PBR. (B) The two alternative methods of selecting  $\alpha_1$  and  $\alpha_2$  produce near identical values, therefore, we are confident that the basal area of YV1 approximates the rectangular basal geometry that was described by the Purvance et al. (2008) fragility equations.  $\alpha_2$  is 1.58 times greater than  $\alpha_1$ , so YV1 is classified as having an asymmetric rocking response. However, the rocking response of YV1 may be complicated by the dip of the pedestal towards the adjacent outcrop, which may be supporting the PBR in a direction orthogonal to its 2-D rocking direction. In other words, YV1 may instead fail in the direction of the supporting outcrop if the supporting outcrop were damaged during ground motion.

## Fragility Age Results Figures

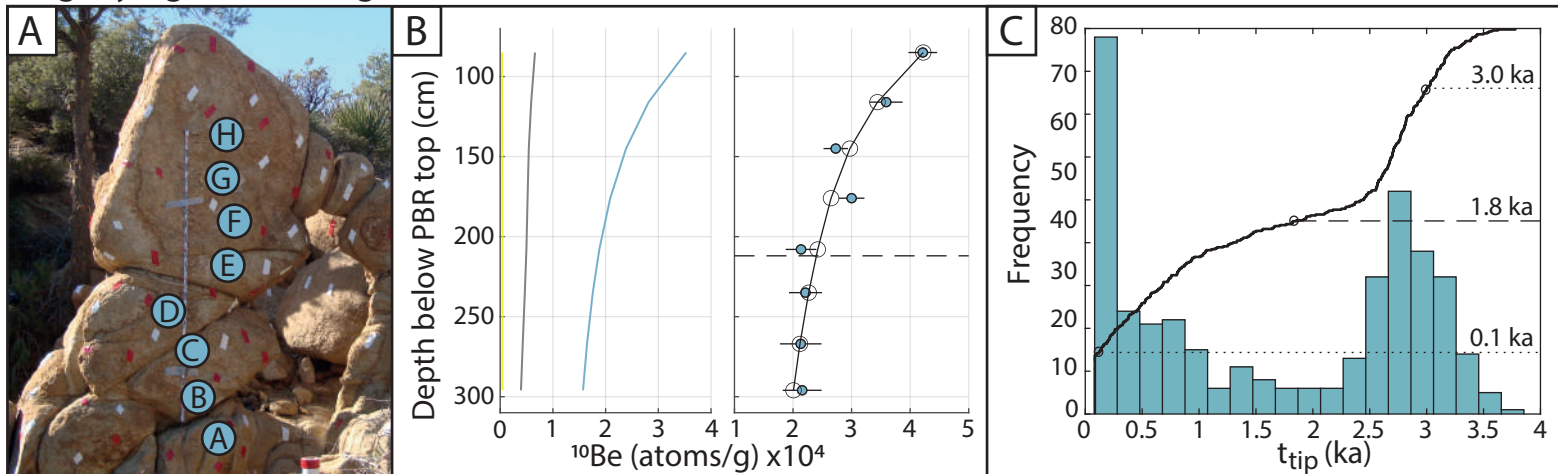

(A) Samples E - H are located on the PBR, and samples A - D are located on the pedestal. Due to the inclined dip of the PBR-pedestal contact, sample D is above the lowest point on the PBR-pedestal contact. (B) The best fit  $\epsilon_1$  suggests rapid exhumation, which is plausible considering the location of the PBR in the center of a stream channel, therefore negligible  $^{10}\text{Be}$  accumulation is modeled to have occurred during exhumation (yellow line). Because the samples were collected from a planar surface, the shielding values result in a post-exhumation  $^{10}\text{Be}$  profile (gray line) that has a shape similar to the pre-exhumation  $^{10}\text{Be}$  profile (blue line), which has the net effect of producing a non-unique  $t_{\text{tip}}$  solution. Therefore, we have low confidence in the fragility age results of YV1.

## Hazard Validation Results Figures

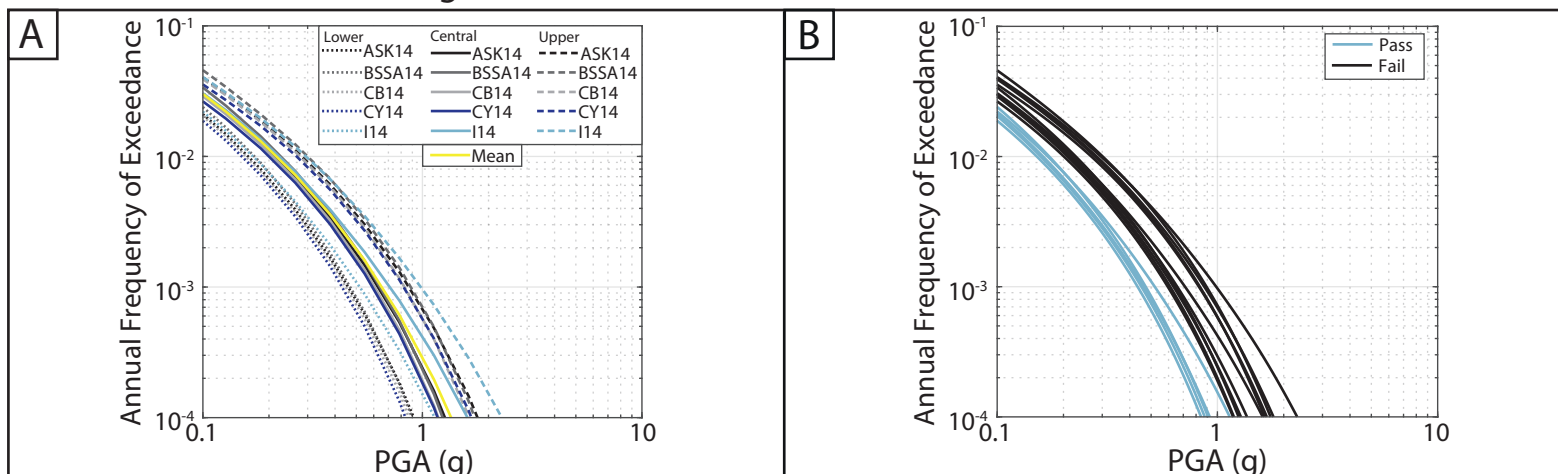

The dominant seismic source controlling the seismicity of the YV1 site is the Pinto Mountain fault. The young fragility age and relatively unstable fragility of YV1 cause the ground-motions estimated by the upper and central branches of all five GMMs to be inconsistent with a 5% probability of survival of YV1. The removal of the I14 GMM, at 2475 year mean return period, reduces the mean ground-motion estimate by 2% and reduces the range of estimated 5th-95th fractile ground motions by 21% at the YV1 site.

Table S1-1. Full parameters used for PBR sample data reduction.

| PBR ID | Sample ID | Blank* | Quartz (g) | Be carrier (g) | [ <sup>9</sup> Be] (ug/g) | <sup>10</sup> Be/ <sup>9</sup> Be <sup>†</sup> | 1σ         | [ <sup>10</sup> Be] (atoms/g) | 1σ <sup>§</sup> | Facility | AMS ID  |
|--------|-----------|--------|------------|----------------|---------------------------|------------------------------------------------|------------|-------------------------------|-----------------|----------|---------|
| BR1    | BR1-A     | 1      | 8.619      | 0.4735         | 424                       | 1.9882E-13                                     | 3.9210E-15 | 305795                        | 6141            | LLNL     | BE32173 |
|        | BR1-B     | 1      | 8.054      | 0.4775         | 424                       | 1.6265E-13                                     | 3.5277E-15 | 269295                        | 5972            | LLNL     | BE32174 |
|        | BR1-C     | 1      | 9.634      | 0.4731         | 424                       | 1.3850E-13                                     | 4.0761E-15 | 189452                        | 5705            | LLNL     | BE32175 |
|        | BR1-D     | 1      | 8.348      | 0.4770         | 424                       | 9.0844E-14                                     | 2.8677E-15 | 143274                        | 4697            | LLNL     | BE32176 |
|        | BR1-E     | 1      | 8.467      | 0.4750         | 424                       | 8.1938E-14                                     | 1.9186E-15 | 126507                        | 3129            | LLNL     | BE32177 |
|        | BR1-F     | 1      | 8.936      | 0.4736         | 424                       | 1.4764E-13                                     | 2.7879E-15 | 218176                        | 4239            | LLNL     | BE32178 |
|        | BR1-G     | 1      | 7.702      | 0.4748         | 424                       | 1.4033E-13                                     | 5.6048E-15 | 240997                        | 9819            | LLNL     | BE32179 |
| BS1    | BS1-A     | 2      | 20.025     | 0.7571         | 266                       | 2.5219E-13                                     | 5.8599E-15 | 168429                        | 3940            | LLNL     | BE25596 |
|        | BS1-B     | 2      | 20.050     | 0.7536         | 266                       | 1.7945E-13                                     | 4.1701E-15 | 118844                        | 2789            | LLNL     | BE25597 |
|        | BS1-C     | 3      | 20.264     | 0.4703         | 424                       | 1.2007E-13                                     | 2.8292E-15 | 77031                         | 1938            | LLNL     | BE26600 |
|        | BS1-E     | 4      | 7.997      | 0.4753         | 424                       | 6.5347E-14                                     | 1.5136E-15 | 105462                        | 2900            | LLNL     | BE31912 |
|        | BS1-F     | 4      | 7.929      | 0.4750         | 424                       | 7.8242E-14                                     | 1.6362E-15 | 128177                        | 3107            | LLNL     | BE31913 |
|        | BS1-G     | 4      | 7.708      | 0.4748         | 424                       | 9.3389E-14                                     | 1.8437E-15 | 158231                        | 3522            | LLNL     | BE31914 |
|        | BS1-H     | 4      | 8.166      | 0.4737         | 424                       | 1.2680E-13                                     | 2.3589E-15 | 203931                        | 4105            | LLNL     | BE31915 |
| BS2    | BS2-A     | 5      | 15.010     | 0.4458         | 449                       | 5.4684E-14                                     | 2.5082E-15 | 44776                         | 2345            | SUERC    | b6856   |
|        | BS2-B     | 5      | 14.857     | 0.4465         | 449                       | 5.5242E-14                                     | 2.4719E-15 | 45811                         | 2342            | SUERC    | b6857   |
|        | BS2-C     | 5      | 12.976     | 0.4459         | 449                       | 5.1336E-14                                     | 2.2711E-15 | 48354                         | 2482            | SUERC    | b6858   |
|        | BS2-D     | 5      | 11.935     | 0.4458         | 449                       | 5.7195E-14                                     | 2.4552E-15 | 59126                         | 2893            | SUERC    | b6860   |
|        | BS2-E     | 5      | 8.503      | 0.4454         | 449                       | 4.3803E-14                                     | 2.7816E-15 | 61869                         | 4548            | SUERC    | b6861   |
|        | BS2-F     | 5      | 9.762      | 0.4453         | 449                       | 6.0543E-14                                     | 2.7342E-15 | 76788                         | 3898            | SUERC    | b6862   |
|        | BS2-G     | 6      | 12.538     | 0.9677         | 204                       | 4.6593E-14                                     | 2.1399E-15 | 46227                         | 2372            | SUERC    | b7594   |
| GV1    | GV1-I     | 2      | 20.090     | 0.7566         | 266                       | 2.9779E-13                                     | 5.5262E-15 | 198296                        | 3701            | LLNL     | BE25598 |
|        | GV1-B     | 7      | 11.977     | 0.4452         | 449                       | 4.0539E-13                                     | 1.1495E-14 | 448281                        | 12855           | SUERC    | b6944   |
|        | GV1-C     | 7      | 13.488     | 0.4451         | 449                       | 3.3452E-13                                     | 1.4564E-14 | 327809                        | 14445           | SUERC    | b6945   |
|        | GV1-D     | 7      | 5.254      | 0.4444         | 449                       | 9.8208E-14                                     | 3.9339E-15 | 240519                        | 10219           | SUERC    | b6946   |
|        | GV1-E     | 7      | 11.736     | 0.4450         | 449                       | 1.7354E-13                                     | 5.1336E-15 | 193520                        | 5921            | SUERC    | b6947   |
|        | GV1-F     | 7      | 12.590     | 0.4447         | 449                       | 1.6070E-13                                     | 5.7753E-15 | 166671                        | 6188            | SUERC    | b6948   |
|        | GV1-G     | 7      | 13.403     | 0.4441         | 449                       | 1.2081E-13                                     | 4.8546E-15 | 116687                        | 4901            | SUERC    | b6950   |
| GV2    | GV2-1     | 2      | 20.034     | 0.7565         | 266                       | 2.4486E-13                                     | 5.6897E-15 | 163298                        | 3821            | LLNL     | BE25599 |
|        | GV2-2     | 2      | 20.038     | 0.7573         | 266                       | 6.1231E-13                                     | 1.0011E-14 | 410286                        | 6726            | LLNL     | BE25600 |
|        | GV2-3     | 3      | 19.494     | 0.4732         | 424                       | 1.0038E-12                                     | 2.3220E-14 | 688326                        | 15979           | LLNL     | BE26594 |
|        | GV2-4     | 3      | 20.018     | 0.4732         | 424                       | 3.1289E-13                                     | 6.4669E-15 | 207599                        | 4366            | LLNL     | BE26595 |
| LB05   | LB05-A    | 8      | 13.675     | 0.4456         | 449                       | 1.6461E-13                                     | 5.6916E-15 | 144402                        | 5987            | SUERC    | b6833   |
|        | LB05-B    | 8      | 12.882     | 0.4447         | 449                       | 1.7912E-13                                     | 5.0220E-15 | 168008                        | 5704            | SUERC    | b6835   |
|        | LB05-C    | 8      | 16.711     | 0.4458         | 449                       | 2.2655E-13                                     | 6.0543E-15 | 167795                        | 5172            | SUERC    | b6836   |
|        | LB05-D    | 8      | 11.235     | 0.4450         | 449                       | 1.7465E-13                                     | 5.2452E-15 | 187462                        | 6787            | SUERC    | b6837   |
|        | LB05-E    | 8      | 16.122     | 0.4444         | 449                       | 2.5975E-13                                     | 5.9427E-15 | 200837                        | 5258            | SUERC    | b6838   |
|        | LB05-F    | 8      | 15.078     | 0.4450         | 449                       | 2.7956E-13                                     | 6.7797E-15 | 232574                        | 6328            | SUERC    | b6839   |
| LJ1    | LJ1-1     | 2      | 20.011     | 0.7569         | 266                       | 1.9213E-13                                     | 4.4583E-15 | 128122                        | 3175            | LLNL     | BE25601 |
|        | LJ1-2     | 2      | 20.006     | 0.7560         | 266                       | 9.9749E-14                                     | 2.3156E-15 | 65952                         | 1875            | LLNL     | BE25602 |
|        | LB1-5     | 4      | 9.162      | 0.4719         | 424                       | 6.8548E-14                                     | 1.6160E-15 | 96060                         | 2374            | LLNL     | BE31926 |
|        | LB1-6     | 4      | 8.124      | 0.4712         | 424                       | 3.8497E-14                                     | 1.1574E-15 | 58786                         | 1927            | LLNL     | BE31925 |
|        | LB1-7     | 4      | 9.343      | 0.4715         | 424                       | 3.4293E-14                                     | 1.1178E-15 | 45139                         | 1621            | LLNL     | BE31924 |
|        | LB1-8     | 4      | 8.678      | 0.4720         | 424                       | 3.0058E-14                                     | 8.4531E-16 | 42124                         | 1335            | LLNL     | BE31923 |
|        | LB1-9     | 4      | 9.520      | 0.4726         | 424                       | 5.0385E-14                                     | 1.3780E-15 | 67040                         | 1957            | LLNL     | BE31922 |
| LJ5    | LJ5-A     | 9      | 15.198     | 0.3368         | 759.44                    | 1.3445E-13                                     | 2.6865E-15 | 149323                        | 3060            | ANSTO    | XBE0347 |
|        | LJ5-B     | 9      | 11.080     | 0.3350         | 759.44                    | 1.6547E-13                                     | 3.3236E-15 | 251321                        | 5142            | ANSTO    | XBE0348 |
|        | LJ5-C     | 9      | 14.403     | 0.3360         | 759.44                    | 2.5096E-13                                     | 4.9874E-15 | 295122                        | 5926            | ANSTO    | XBE0349 |
|        | LJ5-D     | 9      | 16.993     | 0.3368         | 759.44                    | 2.9508E-13                                     | 5.8666E-15 | 295113                        | 5917            | ANSTO    | XBE0350 |
|        | LJ5-E     | 9      | 14.026     | 0.3362         | 759.44                    | 3.1673E-13                                     | 6.2916E-15 | 383238                        | 7671            | ANSTO    | XBE0351 |
|        | LJ5-F     | 9      | 14.874     | 0.3369         | 759.44                    | 3.7021E-13                                     | 7.3557E-15 | 423613                        | 8469            | ANSTO    | XBE0352 |
|        | LJ5-G     | 9      | 16.425     | 0.3349         | 759.44                    | 4.6747E-13                                     | 9.2918E-15 | 481971                        | 9625            | ANSTO    | XBE0353 |



Table S1-1. (continued)

| PBR ID | Sample ID | Blank* | Quartz (g) | Be carrier (g) | [ <sup>9</sup> Be] (ug/g) | <sup>10</sup> Be/ <sup>9</sup> Be <sup>†</sup> | 1 $\sigma$ | [ <sup>10</sup> Be] (atoms/g) | 1 $\sigma^{\S}$ | Facility | AMS ID  |
|--------|-----------|--------|------------|----------------|---------------------------|------------------------------------------------|------------|-------------------------------|-----------------|----------|---------|
| LJB1   | LJB1-A    | 10     | 7.030      | 0.4484         | 449                       | 1.9000E-13                                     | 6.1659E-15 | 355487                        | 11932           | SUERC    | b6993   |
|        | LJB1-B    | 11     | 19.963     | 0.4451         | 449                       | 4.1934E-13                                     | 9.5418E-15 | 277812                        | 6411            | SUERC    | b6847   |
|        | LJB1-C    | 11     | 11.872     | 0.4418         | 449                       | 1.9000E-13                                     | 5.6079E-15 | 207621                        | 6342            | SUERC    | b6848   |
|        | LJB1-D    | 11     | 18.018     | 0.4431         | 449                       | 2.6505E-13                                     | 8.2863E-15 | 192579                        | 6150            | SUERC    | b6849   |
|        | LJB1-E    | 11     | 16.240     | 0.4407         | 449                       | 1.9670E-13                                     | 5.4405E-15 | 156852                        | 4490            | SUERC    | b6850   |
|        | LJB1-F    | 5      | 12.626     | 0.4484         | 449                       | 1.3727E-13                                     | 4.3524E-15 | 141536                        | 4715            | SUERC    | b6869   |
|        | LJB1-G    | 5      | 14.716     | 0.4473         | 449                       | 2.1595E-13                                     | 5.4963E-15 | 192888                        | 5065            | SUERC    | b6866   |
| LJB2   | LJB2-A    | 10     | 15.761     | 0.4478         | 449                       | 4.3580E-13                                     | 9.7092E-15 | 367879                        | 8314            | SUERC    | b6953   |
|        | LJB2-B    | 10     | 16.359     | 0.4483         | 449                       | 3.4903E-13                                     | 8.8722E-15 | 283485                        | 7334            | SUERC    | b6954   |
|        | LJB2-C    | 10     | 15.701     | 0.4478         | 449                       | 3.2448E-13                                     | 7.3656E-15 | 274027                        | 6352            | SUERC    | b6958   |
|        | LJB2-D    | 10     | 17.532     | 0.4489         | 449                       | 3.2727E-13                                     | 7.6167E-15 | 248154                        | 5894            | SUERC    | b6959   |
|        | LJB2-E    | 10     | 17.919     | 0.4477         | 449                       | 3.0439E-13                                     | 9.9603E-15 | 224996                        | 7499            | SUERC    | b6960   |
| MR1    | MR1-A     | 12     | 8.996      | 0.4426         | 449                       | 1.2137E-13                                     | 4.1571E-15 | 174457                        | 6264            | SUERC    | b7510   |
|        | MR1-B     | 12     | 6.116      | 0.4436         | 449                       | 6.5565E-14                                     | 3.2922E-15 | 135758                        | 7400            | SUERC    | b7511   |
|        | MR1-C     | 12     | 17.725     | 0.4428         | 449                       | 1.2583E-13                                     | 4.4640E-15 | 91928                         | 3406            | SUERC    | b7515   |
|        | MR1-D     | 12     | 16.790     | 0.4430         | 449                       | 8.6490E-14                                     | 3.4596E-15 | 65950                         | 2820            | SUERC    | b7516   |
|        | MR1-E     | 12     | 8.082      | 0.4440         | 449                       | 3.2922E-14                                     | 2.0311E-15 | 49022                         | 3630            | SUERC    | b7517   |
|        | MR1-F     | 12     | 3.396      | 0.4437         | 449                       | 1.6349E-14                                     | 1.7186E-15 | 51622                         | 7518            | SUERC    | b7518   |
| PC1    | PC1-A     | 2      | 15.038     | 0.7548         | 266                       | 2.4577E-13                                     | 5.7023E-15 | 217882                        | 5090            | LLNL     | BE25604 |
|        | PC1-B     | 2      | 15.057     | 0.7547         | 266                       | 3.3277E-13                                     | 7.7090E-15 | 295087                        | 6870            | LLNL     | BE25605 |
|        | PC1-C     | 4      | 3.722      | 0.4740         | 424                       | 1.0741E-13                                     | 2.0110E-15 | 377744                        | 7837            | LLNL     | BE31909 |
|        | PC1-F     | 4      | 3.836      | 0.4747         | 424                       | 8.9570E-14                                     | 2.6040E-15 | 304521                        | 9574            | LLNL     | BE31910 |
|        | PC1-G     | 4      | 2.930      | 0.4752         | 424                       | 7.3082E-14                                     | 2.2039E-15 | 323340                        | 10808           | LLNL     | BE31911 |
| PI1    | PI1-A     | 13     | 15.277     | 0.3345         | 759.44                    | 1.2839E-13                                     | 2.6111E-15 | 140821                        | 2912            | ANSTO    | XBE0652 |
|        | PI1-B     | 13     | 15.089     | 0.3370         | 759.44                    | 1.6997E-13                                     | 2.9596E-15 | 190768                        | 3364            | ANSTO    | XBE0653 |
|        | PI1-C     | 13     | 17.456     | 0.3364         | 759.44                    | 2.3720E-13                                     | 4.1261E-15 | 230355                        | 4041            | ANSTO    | XBE0654 |
|        | PI1-D     | 13     | 17.199     | 0.3370         | 759.44                    | 2.2386E-13                                     | 4.6420E-15 | 220950                        | 4621            | ANSTO    | XBE0655 |
|        | PI1-E     | 13     | 15.639     | 0.3365         | 759.44                    | 3.0952E-13                                     | 5.3890E-15 | 336163                        | 5889            | ANSTO    | XBE0656 |
|        | PI1-F     | 13     | 7.191      | 0.3354         | 759.44                    | 1.7440E-13                                     | 3.0359E-15 | 408877                        | 7205            | ANSTO    | XBE0657 |
|        | PI1-FR    | 13     | 7.932      | 0.3368         | 759.44                    | 1.9565E-13                                     | 3.4074E-15 | 418016                        | 7357            | ANSTO    | XBE0658 |
| PI2    | PI2-A     | 14     | 11.785     | 0.3371         | 759.44                    | 6.1966E-14                                     | 1.3491E-15 | 78856                         | 2010            | ANSTO    | XBE0661 |
|        | PI2-B     | 14     | 8.108      | 0.3346         | 759.44                    | 5.4182E-14                                     | 1.5095E-15 | 97466                         | 3228            | ANSTO    | XBE0662 |
|        | PI2-C     | 14     | 7.462      | 0.3364         | 759.44                    | 6.9973E-14                                     | 1.3298E-15 | 142600                        | 3125            | ANSTO    | XBE0663 |
|        | PI2-D     | 14     | 11.952     | 0.3366         | 759.44                    | 1.1711E-13                                     | 2.3714E-15 | 156450                        | 3418            | ANSTO    | XBE0664 |
|        | PI2-E     | 14     | 9.601      | 0.3366         | 759.44                    | 1.0400E-13                                     | 1.8295E-15 | 171435                        | 3302            | ANSTO    | XBE0665 |
|        | PI2-F     | 14     | 9.888      | 0.3320         | 759.44                    | 1.5581E-13                                     | 3.1005E-15 | 252463                        | 5309            | ANSTO    | XBE0666 |
| PNT01  | PNT01-A   | 15     | 16.764     | 0.4461         | 449                       | 1.8916E-13                                     | 4.6314E-15 | 148666                        | 3760            | SUERC    | b7160   |
|        | PNT01-B   | 15     | 17.843     | 0.4452         | 449                       | 1.5317E-13                                     | 6.5007E-15 | 112451                        | 4909            | SUERC    | b7161   |
|        | PNT01-C   | 15     | 18.500     | 0.4453         | 449                       | 1.3336E-13                                     | 3.9339E-15 | 94176                         | 2908            | SUERC    | b7163   |
|        | PNT01-D   | 15     | 15.478     | 0.4451         | 449                       | 9.7929E-14                                     | 4.2687E-15 | 81941                         | 3756            | SUERC    | b7164   |
|        | PNT01-E   | 15     | 16.535     | 0.4453         | 449                       | 9.7929E-14                                     | 3.4875E-15 | 76738                         | 2902            | SUERC    | b7165   |
|        | PNT01-F   | 16     | 15.383     | 0.4471         | 449                       | 2.1316E-13                                     | 5.3289E-15 | 185099                        | 4663            | SUERC    | b7145   |
|        | PNT01-G   | 15     | 14.457     | 0.4459         | 449                       | 8.2584E-14                                     | 3.2364E-15 | 73686                         | 3098            | SUERC    | b7166   |
| PP1    | PP1-A     | 3      | 20.008     | 0.4703         | 424                       | 9.4311E-13                                     | 1.9196E-14 | 626127                        | 12795           | LLNL     | BE26584 |
|        | PP1-B     | 3      | 20.126     | 0.4741         | 424                       | 3.8192E-13                                     | 8.8062E-15 | 252954                        | 5903            | LLNL     | BE26585 |
|        | PP1-C     | 3      | 20.014     | 0.4727         | 424                       | 9.6795E-14                                     | 1.5763E-15 | 62818                         | 1190            | LLNL     | BE26586 |
|        | PP1-D     | 3      | 20.021     | 0.4722         | 424                       | 9.8288E-14                                     | 2.2646E-15 | 63726                         | 1610            | LLNL     | BE26587 |
|        | PP1-H     | 1      | 6.685      | 0.4752         | 424                       | 1.6588E-13                                     | 3.8657E-15 | 329342                        | 7836            | LLNL     | BE32157 |
|        | PP1-I     | 1      | 7.912      | 0.4739         | 424                       | 5.3514E-14                                     | 1.3711E-15 | 86837                         | 2445            | LLNL     | BE32158 |
|        | PP1-J     | 1      | 8.206      | 0.4750         | 424                       | 3.3698E-13                                     | 9.0747E-15 | 548796                        | 14900           | LLNL     | BE32159 |
|        | PP1-K     | 1      | 8.563      | 0.4750         | 424                       | 3.5990E-14                                     | 1.0873E-15 | 52880                         | 1845            | LLNL     | BE32160 |

Table S1-1. (continued)

| PBR ID | Sample ID  | Blank* | Quartz (g) | Be carrier (g) | [ <sup>9</sup> Be] (ug/g) | <sup>10</sup> Be/ <sup>9</sup> Be <sup>†</sup> | 1σ         | [ <sup>10</sup> Be] (atoms/g) | 1σ <sup>§</sup> | Facility | AMS ID  |
|--------|------------|--------|------------|----------------|---------------------------|------------------------------------------------|------------|-------------------------------|-----------------|----------|---------|
| RT1    | RT1-B      | 3      | 20.0344    | 0.4737         | 424                       | 3.5255E-13                                     | 8.1060E-15 | 234216                        | 5458            | LLNL     | BE26589 |
|        | RT1-C      | 3      | 20.0261    | 0.4726         | 424                       | 1.9208E-13                                     | 4.4041E-15 | 126477                        | 2996            | LLNL     | BE26590 |
|        | RT1-D      | 3      | 19.4975    | 0.4735         | 424                       | 3.0566E-13                                     | 7.0036E-15 | 208302                        | 4852            | LLNL     | BE26591 |
|        | RT1-G      | 4      | 6.5217     | 0.4747         | 424                       | 7.0220E-14                                     | 1.5456E-15 | 139198                        | 3609            | LLNL     | BE31916 |
|        | RT1-H      | 4      | 5.1906     | 0.4740         | 424                       | 4.7571E-14                                     | 1.2588E-15 | 116037                        | 3888            | LLNL     | BE31917 |
|        | RT1-I      | 4      | 6.2352     | 0.4749         | 424                       | 5.8198E-14                                     | 1.4270E-15 | 119712                        | 3552            | LLNL     | BE31918 |
|        | RT1-J      | 4      | 5.9923     | 0.4744         | 424                       | 1.1030E-13                                     | 2.0520E-15 | 241297                        | 4957            | LLNL     | BE31919 |
|        | RT1-K      | 4      | 7.4956     | 0.4748         | 424                       | 1.0348E-13                                     | 1.9249E-15 | 180826                        | 3756            | LLNL     | BE31920 |
| SW02   | SW02-A     | 17     | 9.080      | 0.3385         | 759.44                    | 9.3890E-15                                     | 5.3885E-16 | 12193                         | 1140            | ANSTO    | XBE0359 |
|        | SW02-B     | 17     | 11.448     | 0.3382         | 759.44                    | 1.0202E-14                                     | 5.1782E-16 | 10881                         | 876             | ANSTO    | XBE0360 |
|        | SW02-C     | 17     | 10.799     | 0.3381         | 759.44                    | 1.0070E-14                                     | 5.0293E-16 | 11322                         | 907             | ANSTO    | XBE0361 |
|        | SW02-D     | 17     | 10.672     | 0.3393         | 759.44                    | 1.0145E-14                                     | 5.0545E-16 | 11618                         | 925             | ANSTO    | XBE0362 |
|        | SW02-E     | 17     | 12.255     | 0.3387         | 759.44                    | 1.4932E-14                                     | 6.0155E-16 | 16813                         | 925             | ANSTO    | XBE0363 |
|        | SW02-F     | 17     | 14.213     | 0.3380         | 759.44                    | 1.7285E-14                                     | 6.7793E-16 | 17307                         | 881             | ANSTO    | XBE0364 |
|        | SW02-G     | 17     | 6.990      | 0.3384         | 759.44                    | 1.0099E-14                                     | 5.3469E-16 | 17578                         | 1472            | ANSTO    | XBE0365 |
|        | SW02-G (R) | 17     | 6.236      | 0.3375         | 759.44                    | 1.0298E-14                                     | 5.1130E-16 | 20197                         | 1588            | ANSTO    | XBE0366 |
| UCR1   | PBR1-A     | 18     | 9.5211     | 0.2035         | 1082.27                   | 3.4626E-14                                     | 1.2132E-15 | 49122                         | 1953            | LLNL     | BE33167 |
|        | PBR1-B     | 19     | 8.2145     | 0.1816         | 1082.27                   | 3.3420E-14                                     | 1.1468E-15 | 47037                         | 2433            | LLNL     | BE33170 |
|        | PBR1-C     | 18     | 7.3345     | 0.1769         | 1082.27                   | 3.4778E-14                                     | 1.4589E-15 | 55697                         | 2612            | LLNL     | BE33168 |
|        | PBR1-E     | 20     | 5.6500     | 0.2116         | 1082.27                   | 2.7482E-14                                     | 1.3996E-15 | 66807                         | 3910            | LLNL     | BE33173 |
| YV1    | YV1-A      | 10     | 5.979      | 0.4477         | 449                       | 1.3838E-14                                     | 1.1551E-15 | 21562                         | 3326            | SUERC    | b6961   |
|        | YV1-B      | 10     | 7.241      | 0.4475         | 449                       | 1.5736E-14                                     | 1.6768E-15 | 21314                         | 3552            | SUERC    | b6962   |
|        | YV1-C      | 10     | 12.792     | 0.4461         | 449                       | 2.5389E-14                                     | 2.5250E-15 | 22128                         | 2814            | SUERC    | b6964   |
|        | YV1-D      | 10     | 12.539     | 0.4482         | 449                       | 2.4161E-14                                     | 2.2627E-15 | 21364                         | 2622            | SUERC    | b6965   |
|        | YV1-E      | 10     | 15.412     | 0.4462         | 449                       | 3.8781E-14                                     | 2.3548E-15 | 30003                         | 2198            | SUERC    | b6966   |
|        | YV1-F      | 10     | 14.231     | 0.4514         | 449                       | 3.2922E-14                                     | 1.9893E-15 | 27295                         | 2088            | SUERC    | b6967   |
|        | YV1-G      | 10     | 14.707     | 0.4481         | 449                       | 4.3524E-14                                     | 2.9295E-15 | 35911                         | 2809            | SUERC    | b6968   |
|        | YV1-H      | 10     | 14.875     | 0.4491         | 449                       | 5.0778E-14                                     | 2.5361E-15 | 42155                         | 2446            | SUERC    | b6972   |

Notes:

Samples PI1-FR and SW02-G (R) are replicates of the samples PI1-F and SW02-G, respectively. The mean and standard deviation of measured concentration of both the original sample and replicate were used as the concentration and uncertainty of these samples in the fragility age modeling.

\*Blank information is provided in Table S1-4.

<sup>†</sup>LLNL <sup>10</sup>Be/<sup>9</sup>Be data were normalized to the primary standard 07KNSTD3110 with an assumed value of  $2.85 \times 10^{-12}$ , SUERC data were normalized to NIST standard with an assumed value of  $2.79 \times 10^{-11}$ , and ANSTO data were normalized to the primary standard KN-5-2 with a nominal value of  $8.558 \times 10^{-12}$  (Nishiizumi et al., 2007).

<sup>§</sup>Uncertainties include error on the sample and blank propagated in quadrature.

Table S1-2. Full parameters used for stream-sediment sample data reduction.

| Sample ID | Blank* | Quartz (g) | Be carrier (g) | [Be] (ug/g) | $^{10}\text{Be}/^9\text{Be}^\dagger$ | $1\sigma$  | $[^{10}\text{Be}]$ (atoms/g) | $1\sigma^\S$ | Facility | AMS ID  |
|-----------|--------|------------|----------------|-------------|--------------------------------------|------------|------------------------------|--------------|----------|---------|
| BS-SED    | 3      | 20.0463    | 0.4715         | 424         | 1.6436E-13                           | 6.9053E-15 | 107583                       | 4634         | LLNL     | BE26602 |
| BR1-I     | 6      | 7.303      | 0.9693         | 204         | 1.0072E-13                           | 3.0132E-15 | 177424                       | 5600         | SUERC    | b7580   |
| GV1-H     | 6      | 15.979     | 0.9706         | 204         | 1.7996E-13                           | 5.1615E-15 | 146807                       | 4314         | SUERC    | b7581   |
| GV-SED    | 4      | 37.999     | 0.475          | 424         | 3.2903E-13                           | 9.8076E-15 | 115565                       | 3486         | LLNL     | BE26406 |
| LJ-SED    | 3      | 21.1473    | 0.4716         | 424         | 1.3335E-13                           | 2.3627E-15 | 82413                        | 1581         | LLNL     | BE26599 |
| LJB-SED2  | 11     | 11.98      | 0.4414         | 449         | 6.5286E-14                           | 2.7035E-15 | 67699                        | 3150         | SUERC    | b6851   |
| MR1-G     | 6      | 8.978      | 0.8805         | 204         | 8.0631E-14                           | 2.5277E-15 | 104245                       | 3510         | SUERC    | b7587   |
| PI1-G     | 13     | 12.726     | 0.334          | 759.44      | 2.7750E-13                           | 5.5200E-15 | 367395                       | 7358         | ANSTO    | XBE0659 |
| PI2-G     | 14     | 6.527      | 0.3342         | 759.44      | 6.2732E-14                           | 1.3266E-15 | 143147                       | 3705         | ANSTO    | XBE0667 |
| PNT01-I   | 6      | 6.017      | 0.971          | 204         | 3.4875E-14                           | 1.7661E-15 | 70876                        | 4186         | SUERC    | b7592   |
| YV1-K     | 6      | 7.982      | 0.9698         | 204         | 3.0690E-14                           | 1.7772E-15 | 46431                        | 3169         | SUERC    | b7593   |

Notes:

\*Blank information is provided in Table S1-4.

$^\dagger$ LLNL  $^{10}\text{Be}/^9\text{Be}$  data were normalized to the primary standard 07KNSTD3110 with an assumed value of  $2.85 \times 10^{-12}$ , SUERC data were normalized to NIST standard with an assumed value of  $2.79 \times 10^{-11}$ , and ANSTO data were normalized to the primary standard KN-5-2 with a nominal value of  $8.558 \times 10^{-12}$  (Nishiizumi et al., 2007).

$^\S$ Uncertainties include error on the sample and blank propagated in quadrature.

Table S1-3. Full parameters used for saprolite sample data reduction.

| Sample ID | Blank* | Quartz (g) | Be carrier (g) | [Be] (ug/g) | $^{10}\text{Be}/^9\text{Be}^\dagger$ | $1\sigma$   | $[^{10}\text{Be}]$ (atoms/g) | $1\sigma^\S$ | Facility | AMS ID  |
|-----------|--------|------------|----------------|-------------|--------------------------------------|-------------|------------------------------|--------------|----------|---------|
| BS1-D     | 3      | 21.2654    | 0.4727         | 424         | 2.09535E-13                          | 4.98209E-15 | 130125                       | 3180         | LLNL     | BE26601 |
| GV1-I     | 6      | 17.422     | 0.9724         | 204         | 1.9502E-13                           | 5.1057E-15  | 146360                       | 3922         | SUERC    | b7582   |
| GV2-5     | 3      | 20.0672    | 0.4728         | 424         | 1.6480E-13                           | 4.4500E-15  | 108059                       | 3021         | LLNL     | BE26596 |
| LJ1-4     | 3      | 20.0342    | 0.4732         | 424         | 1.1637E-13                           | 2.2313E-15  | 75919                        | 1592         | LLNL     | BE26598 |
| MR1-H     | 6      | 15.762     | 0.9704         | 204         | 7.6725E-14                           | 2.6672E-15  | 62162                        | 2316         | SUERC    | b7588   |
| PNT01-H   | 6      | 18.129     | 0.971          | 204         | 8.5932E-14                           | 2.9574E-15  | 60802                        | 2220         | SUERC    | b7589   |
| SW02-H    | 17     | 14.973     | 0.3376         | 759.44      | 9.3746E-15                           | 4.8009E-16  | 7358                         | 630          | ANSTO    | XBE0367 |

Notes:

\*Blank information is provided in Table S1-4.

$^\dagger$ LLNL  $^{10}\text{Be}/^9\text{Be}$  data were normalized to the primary standard 07KNSTD3110 with an assumed value of  $2.85 \times 10^{-12}$ , SUERC data were normalized to NIST standard with an assumed value of  $2.79 \times 10^{-11}$ , and ANSTO data were normalized to the primary standard KN-5-2 with a nominal value of  $8.558 \times 10^{-12}$  (Nishiizumi et al., 2007).

$^\S$ Uncertainties include error on the sample and blank propagated in quadrature.



Table S1-4. Data for process blanks

| Blank* | Blank ID   | $^{10}\text{Be}/^9\text{Be}^\dagger$ | $1\sigma$   | Facility | AMS ID  |
|--------|------------|--------------------------------------|-------------|----------|---------|
| 1      | BLK102911  | 2.3433E-15                           | 4.4204E-16  | LLNL     | BE32172 |
| 2      | BLK062408  | 1.5592E-15                           | 1.9010E-16  | LLNL     | BE25606 |
| 3      | BLK031009  | 3.5027E-15                           | 3.3830E-16  | LLNL     | BE26582 |
|        | BLK031809  | 2.3376E-15                           | 2.8443E-16  | LLNL     | BE26583 |
| 4      | BLK062911  | 1.9998E-15                           | 2.6591E-16  | LLNL     | BE31893 |
|        | BLK071311  | 2.5527E-15                           | 3.8903E-16  | LLNL     | BE31927 |
|        | BLK072811  | 3.6149E-15                           | 3.6338E-16  | LLNL     | BE31935 |
| 5      | CFG1308    | 4.4361E-15                           | 7.9794E-16  | SUERC    | b6855   |
| 6      | CFG1320    | 2.6561E-15                           | 7.0866E-16  | SUERC    | b7579   |
| 7      | CFG1309    | 3.4317E-15                           | 8.5932E-16  | SUERC    | b6931   |
| 8      | CFG1307    | 1.6907E-14                           | 2.2599E-15  | SUERC    | b6824   |
| 9      | BLK210818  | 1.6713E-15                           | 4.3158E-16  | ANSTO    | XBE0346 |
| 10     | CFG1310    | 4.2408E-15                           | 9.2628E-16  | SUERC    | b6952   |
| 11     | CFG1306    | 4.0455E-15                           | 9.0117E-16  | SUERC    | b6631   |
| 12     | CFG1316    | 3.1806E-15                           | 8.5095E-16  | SUERC    | b7361   |
| 13     | BLK031019B | 1.6549E-15                           | 2.19356E-16 | ANSTO    | XBE0651 |
| 14     | BLK300919B | 7.6416E-15                           | 5.22599E-16 | ANSTO    | XBE0660 |
| 15     | CFG1313    | 2.9574E-15                           | 8.5653E-16  | SUERC    | b7157   |
| 16     | CFG1311    | 8.928E-16                            | 4.464E-16   | SUERC    | b7379   |
| 17     | BLK290818B | 2.9442E-15                           | 2.70301E-16 | ANSTO    | XBE0358 |
| 18     | CB070312   | 2.84658E-15                          | 3.53685E-16 | LLNL     | BE33155 |
| 19     | CB100212   | 3.99941E-15                          | 1.00064E-15 | LLNL     | BE33152 |
| 20     | CFG1202    | 2.8158E-15                           | 3.37725E-16 | LLNL     | BE33154 |

Notes:

\*Each number corresponds to the number in the ‘Blank’ column in the preceding tables. The blanks with ID 3 and 4 use the average ratio and standard deviation as the blank correction.

$^\dagger$ LLNL  $^{10}\text{Be}/^9\text{Be}$  data were normalized to the primary standard 07KNSTD3110 with an assumed value of  $2.85 \times 10^{-12}$ , SUERC data were normalized to NIST standard with an assumed value of  $2.79 \times 10^{-11}$ , and ANSTO data were normalized to the primary standard KN-5-2 with a nominal value of  $8.558 \times 10^{-12}$  (Nishiizumi et al., 2007).

Table S2. Inputs to Balco et al. (2011) fragility age model: Sample-specific constants, and  $^{10}\text{Be}$  concentrations for all the precariously balanced rock (PBR) samples.

| PBR ID | Sample ID | Sample thickness (cm)* | Distance below PBR top (cm) <sup>†</sup> | $S_{0,i}^{\S}$ | $L_i$ (g/cm <sup>2</sup> ) <sup>§</sup> | $[^{10}\text{Be}]$ (atoms/g) | $1\sigma$ |
|--------|-----------|------------------------|------------------------------------------|----------------|-----------------------------------------|------------------------------|-----------|
| BR1    | BR1-A     | 5                      | 116                                      | 0.791          | 183.9                                   | 305795                       | 6141      |
|        | BR1-B     | 2                      | 147                                      | 0.621          | 209.0                                   | 269295                       | 5972      |
|        | BR1-C     | 2.5                    | 178                                      | 0.656          | 196.5                                   | 189452                       | 5705      |
|        | BR1-D     | 2.5                    | 210                                      | 0.435          | 227.9                                   | 143274                       | 4697      |
|        | BR1-E     | 2                      | 238                                      | 0.437          | 218.0                                   | 126507                       | 3129      |
|        | BR1-F     | 2                      | 287                                      | 0.581          | 191.2                                   | 218176                       | 4239      |
|        | BR1-G     | 1                      | 329                                      | 0.782          | 177.5                                   | 240997                       | 9819      |
| BS1    | BS1-A     | 3                      | 234                                      | 0.383          | 232.8                                   | 168429                       | 3940      |
|        | BS1-B     | 5                      | 320                                      | 0.392          | 206.3                                   | 118844                       | 2789      |
|        | BS1-C     | 3                      | 378                                      | 0.146          | 219.4                                   | 77031                        | 1938      |
|        | BS1-E     | 3.5                    | 348                                      | 0.091          | 213.7                                   | 105462                       | 2900      |
|        | BS1-F     | 2.5                    | 300                                      | 0.287          | 236.6                                   | 128177                       | 3107      |
|        | BS1-G     | 2                      | 252                                      | 0.422          | 215.0                                   | 158231                       | 3522      |
|        | BS1-H     | 1                      | 198                                      | 0.494          | 215.0                                   | 203931                       | 4105      |
| BS2    | BS2-A     | 7.5                    | 111                                      | 0.743          | 187.5                                   | 44776                        | 2345      |
|        | BS2-B     | 6                      | 90                                       | 0.689          | 202.4                                   | 45811                        | 2342      |
|        | BS2-C     | 6.5                    | 71                                       | 0.712          | 200.8                                   | 48354                        | 2482      |
|        | BS2-D     | 6                      | 51                                       | 0.766          | 196.2                                   | 59126                        | 2893      |
|        | BS2-E     | 6                      | 30                                       | 0.861          | 175.7                                   | 61869                        | 4548      |
|        | BS2-F     | 5.75                   | 11                                       | 0.933          | 168.4                                   | 76788                        | 3898      |
| GV1    | GV1-I     | 5                      | 89                                       | 0.836          | 174.6                                   | 198296                       | 3701      |
|        | GV1-B     | 1.5                    | 3                                        | 0.959          | 163.8                                   | 448281                       | 12855     |
|        | GV1-C     | 2.5                    | 24                                       | 0.919          | 169.7                                   | 327809                       | 14445     |
|        | GV1-D     | 1                      | 49                                       | 0.839          | 178.1                                   | 240519                       | 10219     |
|        | GV1-E     | 1.5                    | 77                                       | 0.737          | 188.3                                   | 193520                       | 5921      |
|        | GV1-F     | 2.5                    | 101                                      | 0.75           | 177.6                                   | 166671                       | 6188      |
|        | GV1-G     | 2                      | 130                                      | 0.735          | 182.1                                   | 116687                       | 4901      |
| LB05   | LB05-A    | 4                      | 160                                      | 0.689          | 188.2                                   | 144402                       | 5987      |
|        | LB05-B    | 5                      | 140                                      | 0.679          | 189.5                                   | 168008                       | 5704      |
|        | LB05-C    | 5.5                    | 121                                      | 0.697          | 189.9                                   | 167795                       | 5172      |
|        | LB05-D    | 5                      | 102                                      | 0.725          | 183.8                                   | 187462                       | 6787      |
|        | LB05-E    | 5                      | 82                                       | 0.769          | 184.7                                   | 200837                       | 5258      |
|        | LB05-F    | 6                      | 61                                       | 0.849          | 175.5                                   | 232574                       | 6328      |
| LJ1    | LJ1-1     | 7                      | 249                                      | 0.508          | 206.8                                   | 128122                       | 3175      |
|        | LJ1-2     | 4                      | 467                                      | 0.630          | 184.9                                   | 65952                        | 1875      |
|        | LB1-5     | 1.5                    | 282                                      | 0.391          | 221.6                                   | 96060                        | 2374      |
|        | LB1-6     | 2                      | 322                                      | 0.244          | 246.6                                   | 58786                        | 1927      |
|        | LB1-7     | 1                      | 362                                      | 0.182          | 256.9                                   | 45139                        | 1621      |
|        | LB1-8     | 1.5                    | 393                                      | 0.158          | 257.3                                   | 42124                        | 1335      |
|        | LB1-9     | 1.75                   | 508                                      | 0.665          | 184.7                                   | 67040                        | 1957      |

Table S2. (continued)

| PBR ID | Sample ID | Sample thickness (cm)* | Distance below PBR top (cm) <sup>†</sup> | S <sub>0,i</sub> <sup>§</sup> | L <sub>i</sub> (g/cm <sup>2</sup> ) <sup>§</sup> | [ <sup>10</sup> Be] (atoms/g) | 1 $\sigma$ |
|--------|-----------|------------------------|------------------------------------------|-------------------------------|--------------------------------------------------|-------------------------------|------------|
| LJ5    | LJ5-A     | 2.5                    | 261                                      | 0.547                         | 192.3                                            | 149323                        | 3060       |
|        | LJ5-B     | 2                      | 235                                      | 0.598                         | 190.3                                            | 251321                        | 5142       |
|        | LJ5-C     | 2                      | 210                                      | 0.625                         | 188.7                                            | 295122                        | 5926       |
|        | LJ5-D     | 2                      | 169                                      | 0.618                         | 189.0                                            | 295113                        | 5917       |
|        | LJ5-E     | 2.5                    | 132                                      | 0.676                         | 186.8                                            | 383238                        | 7671       |
|        | LJ5-F     | 2                      | 94                                       | 0.711                         | 185.1                                            | 423613                        | 8469       |
|        | LJ5-G     | 2                      | 52                                       | 0.781                         | 182.3                                            | 481971                        | 9625       |
| LJB1   | LJB1-A    | 5                      | 48                                       | 0.946                         | 163.4                                            | 355487                        | 11932      |
|        | LJB1-B    | 3                      | 82                                       | 0.764                         | 188.0                                            | 277812                        | 6411       |
|        | LJB1-C    | 3                      | 118                                      | 0.644                         | 197.4                                            | 207621                        | 6342       |
|        | LJB1-D    | 5                      | 148                                      | 0.579                         | 228.5                                            | 192579                        | 6150       |
|        | LJB1-E    | 2                      | 198                                      | 0.628                         | 196.8                                            | 156852                        | 4490       |
|        | LJB1-F    | 1                      | 250                                      | 0.774                         | 178.2                                            | 141536                        | 4715       |
|        | LJB1-G    | 1                      | 274                                      | 0.863                         | 174.5                                            | 192888                        | 5065       |
| LJB2   | LJB2-A    | 1                      | 18                                       | 0.944                         | 167.1                                            | 367879                        | 8314       |
|        | LJB2-B    | 2.5                    | 43                                       | 0.858                         | 175.6                                            | 283485                        | 7334       |
|        | LJB2-C    | 2.5                    | 63                                       | 0.818                         | 178.1                                            | 274027                        | 6352       |
|        | LJB2-D    | 3.5                    | 87                                       | 0.866                         | 173.3                                            | 248154                        | 5894       |
|        | LJB2-E    | 2.75                   | 122                                      | 0.776                         | 181.3                                            | 224996                        | 7499       |
| MR1    | MR1-A     | 2                      | 112                                      | 0.805                         | 181.0                                            | 174457                        | 6264       |
|        | MR1-B     | 2                      | 140                                      | 0.729                         | 197.9                                            | 135758                        | 7400       |
|        | MR1-C     | 3                      | 175                                      | 0.631                         | 207.5                                            | 91928                         | 3406       |
|        | MR1-D     | 2.5                    | 224                                      | 0.757                         | 180.6                                            | 65950                         | 2820       |
|        | MR1-E     | 2                      | 254                                      | 0.689                         | 184.8                                            | 49022                         | 3630       |
|        | MR1-F     | 2                      | 303                                      | 0.637                         | 188.5                                            | 51622                         | 7518       |
| PC1    | PC1-A     | 5                      | 305                                      | 0.605                         | 187.6                                            | 217882                        | 5090       |
|        | PC1-B     | 4                      | 246                                      | 0.624                         | 197.7                                            | 295087                        | 6870       |
|        | PC1-C     | 4                      | 181                                      | 0.732                         | 184.7                                            | 377744                        | 7837       |
|        | PC1-F     | 2                      | 137                                      | 0.690                         | 192.1                                            | 304521                        | 9574       |
|        | PC1-G     | 2                      | 375                                      | 0.694                         | 179.3                                            | 323340                        | 10808      |
| PI1    | PI1-A     | 2                      | 164                                      | 0.720                         | 185.2                                            | 140821                        | 2912       |
|        | PI1-B     | 2                      | 129                                      | 0.759                         | 183.8                                            | 190768                        | 3364       |
|        | PI1-C     | 2                      | 107                                      | 0.779                         | 181.9                                            | 230355                        | 4041       |
|        | PI1-D     | 2                      | 94                                       | 0.689                         | 187.2                                            | 220950                        | 4621       |
|        | PI1-E     | 2                      | 59                                       | 0.763                         | 183.0                                            | 336163                        | 5889       |
|        | PI1-F     | 2                      | 29                                       | 0.821                         | 179.3                                            | 413447                        | 6463       |
| PI2    | PI2-A     | 2                      | 290                                      | 0.761                         | 181.6                                            | 78856                         | 2010       |
|        | PI2-B     | 2                      | 255                                      | 0.782                         | 180.6                                            | 97466                         | 3228       |
|        | PI2-C     | 2                      | 226                                      | 0.840                         | 172.7                                            | 142600                        | 3125       |
|        | PI2-D     | 2                      | 201                                      | 0.591                         | 192.2                                            | 156450                        | 3418       |
|        | PI2-E     | 2                      | 167                                      | 0.646                         | 188.9                                            | 171435                        | 3302       |
|        | PI2-F     | 2                      | 133                                      | 0.721                         | 184.4                                            | 252463                        | 5309       |



Table S2. (continued)

| PBR ID | Sample ID | Sample thickness (cm)* | Distance below PBR top (cm) <sup>†</sup> | S <sub>0,i</sub> <sup>§</sup> | Li (g/cm <sup>2</sup> ) <sup>§</sup> | [ <sup>10</sup> Be] (atoms/g) | 1 $\sigma$ |
|--------|-----------|------------------------|------------------------------------------|-------------------------------|--------------------------------------|-------------------------------|------------|
| PNT01  | PNT01-A   | 2                      | 26                                       | 0.804                         | 181.4                                | 148666                        | 3760       |
|        | PNT01-B   | 2.75                   | 55                                       | 0.773                         | 182.5                                | 112451                        | 4909       |
|        | PNT01-C   | 3                      | 84                                       | 0.720                         | 185.0                                | 94176                         | 2908       |
|        | PNT01-D   | 1.5                    | 107                                      | 0.704                         | 185.4                                | 81941                         | 3756       |
|        | PNT01-E   | 2.5                    | 139                                      | 0.673                         | 186.8                                | 76738                         | 2902       |
|        | PNT01-F   | 1.75                   | 2                                        | 0.816                         | 180.9                                | 185099                        | 4663       |
|        | PNT01-G   | 2                      | 195                                      | 0.743                         | 184.7                                | 73686                         | 3098       |
| PP1    | PP1-A     | 3                      | 19                                       | 0.980                         | 155.2                                | 626127                        | 12795      |
|        | PP1-B     | 3                      | 245                                      | 0.221                         | 298.7                                | 252954                        | 5903       |
|        | PP1-C     | 3                      | 285                                      | 0.145                         | 327.3                                | 62818                         | 1190       |
|        | PP1-D     | 3                      | 343                                      | 0.224                         | 240.0                                | 63726                         | 1610       |
|        | PP1-H     | 3                      | 180                                      | 0.567                         | 210.4                                | 329342                        | 7836       |
|        | PP1-I     | 3                      | 273                                      | 0.164                         | 318.1                                | 86837                         | 2445       |
|        | PP1-J     | 3                      | 138                                      | 0.713                         | 193.2                                | 548796                        | 14900      |
|        | PP1-K     | 3                      | 410                                      | 0.312                         | 210.9                                | 52880                         | 1845       |
| RT1    | RT1-B     | 2                      | 92                                       | 0.685                         | 330.4                                | 234216                        | 5458       |
|        | RT1-C     | 2                      | 192                                      | 0.455                         | 220.6                                | 126477                        | 2996       |
|        | RT1-D     | 2                      | 310                                      | 0.776                         | 173.9                                | 208302                        | 4852       |
|        | RT1-G     | 1.5                    | 151                                      | 0.506                         | 217.0                                | 139198                        | 3609       |
|        | RT1-H     | 2.75                   | 231                                      | 0.400                         | 216.7                                | 116037                        | 3888       |
|        | RT1-I     | 2                      | 270                                      | 0.398                         | 209.3                                | 119712                        | 3552       |
|        | RT1-J     | 3.5                    | 337                                      | 0.835                         | 170.6                                | 241297                        | 4957       |
|        | RT1-K     | 2                      | 376                                      | 0.747                         | 179.9                                | 180826                        | 3756       |
| SW02   | SW02-A    | 2.5                    | 240                                      | 0.616                         | 189.2                                | 12193                         | 1140       |
|        | SW02-B    | 2.5                    | 204                                      | 0.659                         | 187.6                                | 10881                         | 876        |
|        | SW02-C    | 2                      | 179                                      | 0.678                         | 186.7                                | 11322                         | 907        |
|        | SW02-D    | 2.5                    | 145                                      | 0.681                         | 186.4                                | 11618                         | 925        |
|        | SW02-E    | 2.5                    | 115                                      | 0.729                         | 184.7                                | 16813                         | 925        |
|        | SW02-F    | 2.5                    | 89                                       | 0.733                         | 184.4                                | 17307                         | 881        |
|        | SW02-G    | 2.5                    | 56                                       | 0.767                         | 182.9                                | 18888                         | 1852       |
| UCR1   | PBR1-A    | 4.5                    | 87                                       | 0.649                         | 188.7                                | 49122                         | 1953       |
|        | PBR1-B    | 4                      | 66                                       | 0.658                         | 189.9                                | 47037                         | 2433       |
|        | PBR1-C    | 3.5                    | 42                                       | 0.709                         | 186.0                                | 55697                         | 2612       |
|        | PBR1-E    | 4                      | 0                                        | 0.746                         | 180.2                                | 66807                         | 3910       |
| YV1    | YV1-A     | 3.5                    | 296                                      | 0.586                         | 191.1                                | 21562                         | 3326       |
|        | YV1-B     | 1.5                    | 267                                      | 0.610                         | 189.6                                | 21314                         | 3552       |
|        | YV1-C     | 1.25                   | 235                                      | 0.639                         | 187.9                                | 22128                         | 2814       |
|        | YV1-D     | 1.25                   | 208                                      | 0.657                         | 187.4                                | 21364                         | 2622       |
|        | YV1-E     | 1.5                    | 176                                      | 0.659                         | 186.9                                | 30003                         | 2198       |
|        | YV1-F     | 1.5                    | 145                                      | 0.663                         | 187.4                                | 27295                         | 2088       |
|        | YV1-G     | 1.5                    | 116                                      | 0.695                         | 186.2                                | 35911                         | 2809       |
|        | YV1-H     | 1.5                    | 85                                       | 0.755                         | 183.6                                | 42155                         | 2446       |

---

Notes:

A surface erosion rate of zero was used for all samples, with the exception of GV2-3 to match the value used by Balco et al. (2011).

\*Measured in field when each sample was collected.

†Vertical height measured from the highest point on the top of the PBR to the sample point.

§Calculated using the code of Balco (2014).

---

| PBR Name | fval  | t <sub>0</sub> (ka) | t <sub>tip</sub> (ka) | ε <sub>0,sp</sub> (m/m.y.) | ε <sub>0,mu</sub> (m/m.y.) | ε <sub>1</sub> (m/m.y.) |
|----------|-------|---------------------|-----------------------|----------------------------|----------------------------|-------------------------|
| BR1      | 211.0 | 42.6                | 42.4                  | 10.1                       | 25.2                       | 10000.0                 |
| BS1      | 3.0   | 15.9                | 4.4                   | 2.9                        | 0.1                        | 238.1                   |
| BS2      | 2.2   | 4.7                 | 4.6                   | 109.0                      | 36.2                       | 9998.3                  |
| GV1      | 18.3  | 18.5                | 7.4                   | 27.0                       | 67.6                       | 91.1                    |
| GV2      | 35.2  | 24.7                | 17.7                  | 15.9                       | 39.7                       | 214.7                   |
| LB05     | 1.6   | 29.4                | 29.3                  | 36.9                       | 92.3                       | 10000.0                 |
| LJ1      | 25.8  | 35.6                | 9.9                   | 10.2                       | 25.4                       | 164.0                   |
| LJ5      | 14.9  | 79.0                | 49.7                  | 30.1                       | 75.2                       | 65.4                    |
| LJB1     | 51.1  | 10.8                | 10.5                  | 19.3                       | 3.9                        | 9999.9                  |
| LJB2     | 9.0   | 14.3                | 14.2                  | 42.0                       | 5.2                        | 9999.8                  |
| MR1      | 4.4   | 4.9                 | 1.3                   | 4.1                        | 9.1                        | 622.0                   |
| PC1      | 110.9 | 31.6                | 22.9                  | 10000.0                    | 10000.0                    | 353.4                   |
| PI1      | 14.5  | 22.4                | 11.5                  | 26.1                       | 65.2                       | 95.3                    |
| PI2      | 55.5  | 21.3                | 4.1                   | 8.2                        | 12.8                       | 135.9                   |
| PNT01    | 2.7   | 9.8                 | 9.7                   | 46.0                       | 115.0                      | 10000.0                 |
| PP1      | 735.7 | 138.8               | 26.3                  | 10000.0                    | 10000.0                    | 29.5                    |
| RT1      | 75.9  | 43.1                | 38.3                  | 36.7                       | 91.6                       | 725.8                   |
| SW02     | 11.2  | 1.8                 | 1.7                   | 269.6                      | 673.9                      | 9999.4                  |
| UCR1     | 1.9   | 12.9                | 12.9                  | 190.2                      | 475.5                      | 9999.4                  |
| YV1      | 5.6   | 1.0                 | 0.8                   | 88.5                       | 33.7                       | 9999.7                  |

Notes:  
Results calculated with the 4-parameter forward model scheme of Balco et al. (2011).



Table S4. Median and 16<sup>th</sup>-84<sup>th</sup> percentile uncertainty parameter results of the fragility age forward model.

| PBR<br>Name | $t_0$ (ka) |       |       | $t_{tip}$ (ka) |      |      | $\epsilon_{0,sp}$ (m/m.y.) |        |         | $\epsilon_{0,mu}$ (m/m.y.) |        |         | $\epsilon_1$ (m/m.y.) |         |         |
|-------------|------------|-------|-------|----------------|------|------|----------------------------|--------|---------|----------------------------|--------|---------|-----------------------|---------|---------|
|             | Median     | 16th  | 84th  | Median         | 16th | 84th | Median                     | 16th   | 84th    | Median                     | 16th   | 84th    | Median                | 16th    | 84th    |
| BR1         | 42.6       | 41.4  | 43.7  | 42.3           | 41.1 | 43.5 | 9.9                        | 8.8    | 11.6    | 24.8                       | 8.8    | 11.6    | 10000.0               | 10000.0 | 10000.0 |
| BS1         | 14.7       | 6.8   | 19.3  | 4.7            | 3.7  | 5.9  | 2.7                        | 2.1    | 3.7     | 0.1                        | 2.1    | 3.7     | 261.6                 | 197.1   | 1350.5  |
| BS2         | 7.2        | 1.6   | 9.9   | 5.7            | 0.7  | 7.9  | 130.0                      | 97.8   | 356.8   | 85.8                       | 97.8   | 356.8   | 9988.9                | 239.0   | 9999.8  |
| GV1         | 18.6       | 16.1  | 21.0  | 7.3            | 6.3  | 8.3  | 27.4                       | 24.1   | 31.9    | 68.1                       | 24.1   | 31.9    | 88.1                  | 70.3    | 123.2   |
| GV2         | 24.8       | 23.1  | 26.4  | 17.6           | 16.5 | 18.8 | 15.9                       | 14.8   | 17.1    | 39.5                       | 14.8   | 17.1    | 206.8                 | 158.8   | 330.4   |
| LB05        | 28.7       | 12.8  | 31.1  | 28.5           | 10.3 | 30.9 | 36.6                       | 27.3   | 56.5    | 79.4                       | 27.3   | 56.5    | 9999.5                | 9930.7  | 9999.9  |
| LJ1         | 35.6       | 33.8  | 37.6  | 9.9            | 9.5  | 10.3 | 10.2                       | 8.8    | 12.0    | 25.4                       | 8.8    | 12.0    | 164.4                 | 154.0   | 175.2   |
| LJ5         | 80.2       | 70.1  | 86.8  | 49.8           | 48.3 | 51.2 | 35.3                       | 13.5   | 4001.7  | 88.3                       | 13.5   | 4001.7  | 62.6                  | 53.4    | 91.6    |
| LJB1        | 10.7       | 9.6   | 12.0  | 10.5           | 9.4  | 11.8 | 19.3                       | 17.9   | 21.0    | 3.8                        | 17.9   | 21.0    | 9999.9                | 9999.4  | 10000.0 |
| LJB2        | 14.1       | 8.1   | 19.8  | 14.0           | 7.9  | 19.5 | 43.4                       | 38.1   | 51.1    | 4.9                        | 38.1   | 51.1    | 9999.8                | 9998.1  | 10000.0 |
| MR1         | 3.5        | 0.3   | 7.7   | 1.3            | 0.1  | 2.3  | 4.0                        | 3.7    | 4.5     | 9.2                        | 3.7    | 4.5     | 969.2                 | 393.3   | 9999.8  |
| PC1         | 31.6       | 30.7  | 32.4  | 22.9           | 22.3 | 23.5 | 9999.7                     | 9995.6 | 9999.8  | 9999.8                     | 9995.6 | 9999.8  | 355.4                 | 308.2   | 418.4   |
| PI1         | 22.2       | 20.5  | 23.7  | 11.4           | 11.0 | 11.8 | 25.9                       | 23.5   | 28.6    | 64.1                       | 23.5   | 28.6    | 96.1                  | 85.3    | 111.1   |
| PI2         | 21.2       | 18.8  | 23.7  | 4.0            | 3.6  | 4.5  | 8.1                        | 7.2    | 9.3     | 12.4                       | 7.2    | 9.3     | 136.5                 | 122.2   | 154.5   |
| PNT01       | 9.5        | 7.7   | 10.1  | 9.4            | 7.5  | 9.9  | 46.1                       | 43.9   | 48.5    | 110.5                      | 43.9   | 48.5    | 10000.0               | 9999.8  | 10000.0 |
| PP1         | 138.7      | 137.5 | 140.0 | 26.5           | 26.2 | 26.8 | 10000.0                    | 9999.9 | 10000.0 | 10000.0                    | 9999.9 | 10000.0 | 29.6                  | 29.3    | 29.9    |
| RT1         | 42.8       | 38.9  | 49.2  | 38.3           | 37.6 | 38.9 | 35.3                       | 21.3   | 3999.9  | 87.6                       | 21.3   | 3999.9  | 736.8                 | 323.5   | 9999.9  |
| SW02        | 1.8        | 0.5   | 2.1   | 1.5            | 0.2  | 1.7  | 295.4                      | 234.1  | 503.8   | 587.2                      | 234.1  | 503.8   | 9998.9                | 2961.3  | 9999.9  |
| UCR1        | 12.8       | 6.9   | 14.4  | 12.4           | 6.3  | 13.7 | 200.3                      | 142.4  | 470.7   | 428.0                      | 142.4  | 470.7   | 9999.8                | 452.7   | 10000.0 |
| YV1         | 2.7        | 0.4   | 3.6   | 1.8            | 0.1  | 3.0  | 99.2                       | 77.7   | 161.6   | 66.4                       | 77.7   | 161.6   | 9999.2                | 1467.3  | 10000.0 |

Notes:

Results calculated for the 4 free parameters. The Monte Carlo simulation was run for 400 iterations, starting at the best-fit values in Table S3.

Table S5. Stream-sediment samples online erosion rate calculator inputs and outputs.

| Sample name | Mean Latitude (DD) | Mean Longitude (DD) | Effective Elevation (m) | Elv/pressure flag | Thickness (cm) | Density (g/cm <sup>2</sup> ) | Shielding correction | [ <sup>10</sup> Be] (atoms/g) | +/-  | Be AMS standard | [ <sup>26</sup> Al] (atoms/g) | +/- | Al AMS standard | Erosion rate* (m/m.y.) | +/-  |
|-------------|--------------------|---------------------|-------------------------|-------------------|----------------|------------------------------|----------------------|-------------------------------|------|-----------------|-------------------------------|-----|-----------------|------------------------|------|
| BS-SED      | 33.9080            | -116.9864           | 780.4                   | std               | 1              | 2                            | 1                    | 107583                        | 4634 | 07KNSTD         | 0                             | 0   | KNSTD           | 53.2                   | 3.9  |
| BR1-I       | 33.5928            | -116.9241           | 768.6                   | std               | 1              | 2                            | 1                    | 177424                        | 5600 | 07KNSTD         | 0                             | 0   | KNSTD           | 31.5                   | 2.1  |
| GV1-H       | 34.2788            | -117.2414           | 1540.6                  | std               | 1              | 2                            | 1                    | 146807                        | 4314 | 07KNSTD         | 0                             | 0   | KNSTD           | 67.0                   | 4.4  |
| GV-SED      | 34.2831            | -117.2450           | 1556.1                  | std               | 1              | 2                            | 1                    | 115565                        | 3486 | 07KNSTD         | 0                             | 0   | KNSTD           | 85.5                   | 5.7  |
| LJ-SED      | 34.5943            | -117.8518           | 940.6                   | std               | 1              | 2                            | 1                    | 82413                         | 1581 | 07KNSTD         | 0                             | 0   | KNSTD           | 78.8                   | 4.9  |
| LJB-SED2    | 34.6024            | -117.8568           | 943.5                   | std               | 1              | 2                            | 1                    | 67699                         | 3150 | 07KNSTD         | 0                             | 0   | KNSTD           | 96.1                   | 7.3  |
| MR1-G       | 33.8088            | -117.2535           | 561.4                   | std               | 1              | 2                            | 1                    | 104245                        | 3510 | 07KNSTD         | 0                             | 0   | KNSTD           | 46.7                   | 3.2  |
| PI1-G       | 34.3063            | -117.2260           | 1689.9                  | std               | 1              | 2                            | 1                    | 367395                        | 7358 | 07KNSTD         | 0                             | 0   | KNSTD           | 29.8                   | 1.9  |
| PI2-G       | 34.2979            | -117.2232           | 1535.6                  | std               | 1              | 2                            | 1                    | 143147                        | 3705 | 07KNSTD         | 0                             | 0   | KNSTD           | 68.5                   | 4.4  |
| PNT01-I     | 34.1421            | -116.4891           | 1260.2                  | std               | 1              | 2                            | 1                    | 70876                         | 4186 | 07KNSTD         | 0                             | 0   | KNSTD           | 113.0                  | 9.4  |
| YV1-K       | 34.1180            | -116.5105           | 1298.1                  | std               | 1              | 2                            | 1                    | 46431                         | 3169 | 07KNSTD         | 0                             | 0   | KNSTD           | 174.0                  | 15.7 |

## Notes:

\*Version 3 of the online exposure age calculator described by Balco et al. (2008), and subsequently updated, was used for calculations. Erosion rates were calculated using a <sup>10</sup>Be production rate of  $4.132 \pm 0.218$  atoms/g/yr, based on the “primary” calibration data set of Borchers et al. (2016) and a constant production rate model and scaling scheme for spallation (Lal, 1991; Stone, 2000).

Table S6. Saprolite samples online erosion rate calculator inputs and outputs.

| Sample name | Mean Latitude (DD) | Mean Longitude (DD) | Effective Elevation (m) | Elv/pressure flag | Thickness (cm) | Density (g/cm <sup>2</sup> ) | Shielding correction | [ <sup>10</sup> Be] (atoms/g) | +/-  | Be AMS standard | [ <sup>26</sup> Al] (atoms/g) | +/- | Al AMS standard | Erosion rate* (m/m.y.) | +/-  |
|-------------|--------------------|---------------------|-------------------------|-------------------|----------------|------------------------------|----------------------|-------------------------------|------|-----------------|-------------------------------|-----|-----------------|------------------------|------|
| BS1-D       | 33.89750           | -116.98592          | 759                     | std               | 5.0            | 2                            | 0.762                | 130125                        | 3144 | 07KNSTD         | 0                             | 0   | KNSTD           | 33.7                   | 2.2  |
| GV1-I       | 34.27813           | -117.23254          | 1437                    | std               | 3.5            | 2                            | 0.924                | 146360                        | 3922 | 07KNSTD         | 0                             | 0   | KNSTD           | 57.7                   | 3.8  |
| GV2-5       | 34.27878           | -117.2471           | 1510                    | std               | 5.0            | 2                            | 0.941                | 108059                        | 2978 | 07KNSTD         | 0                             | 0   | KNSTD           | 82.2                   | 5.4  |
| LJ1-4       | 34.59453           | -117.85326          | 947                     | std               | 7.0            | 2                            | 0.916                | 75919                         | 1508 | 07KNSTD         | 0                             | 0   | KNSTD           | 77.5                   | 4.9  |
| MR1-H       | 33.80942           | -117.25282          | 534                     | std               | 4.0            | 2                            | 0.934                | 62162                         | 2316 | 07KNSTD         | 0                             | 0   | KNSTD           | 72.2                   | 5.1  |
| PNT01-H     | 34.13845           | -116.47844          | 1125                    | std               | 7.0            | 2                            | 0.896                | 60802                         | 2220 | 07KNSTD         | 0                             | 0   | KNSTD           | 106.0                  | 7.4  |
| SW02-H      | 34.29688           | -117.33979          | 1107                    | std               | 2.5            | 2                            | 0.931                | 7358                          | 630  | 07KNSTD         | 0                             | 0   | KNSTD           | 892.0                  | 92.8 |

Notes:

\*Measured in field when sample was collected.

†Calculated as the product of the topographic shielding measured in the field and shielding due to thickness of overlying soil.

§Version 3 of the online exposure age calculator described by Balco et al. (2008), and subsequently updated, was used for calculations. Erosion rates were calculated using a <sup>10</sup>Be production rate of  $4.132 \pm 0.218$  atoms/g/yr, based on the “primary” calibration data set of Borchers et al. (2016) and a constant production rate model and scaling scheme for spallation (Lal, 1991; Stone, 2000).

## References

- Balco, G. (2014). Simple computer code for estimating cosmic-ray shielding by oddly shaped objects. *Quaternary Geochronology*, 22, 175-182. doi:10.1016/j.quageo.2013.12.002
- Balco, G., Purvance, M. D., & Rood, D. H. (2011). Exposure dating of precariously balanced rocks. *Quaternary Geochronology*, 6(3), 295-303. doi:10.1016/j.quageo.2011.03.007
- Balco, G., Stone, J. O., Lifton, N. A., & Dunai, T. J. (2008). A complete and easily accessible means of calculating surface exposure ages or erosion rates from <sup>10</sup>Be and <sup>26</sup>Al measurements. *Quaternary Geochronology*, 3(3), 174-195. doi:10.1016/j.quageo.2007.12.001
- Borchers, B., Marrero, S., Balco, G., Caffee, M., Goehring, B., Lifton, N., et al. (2016). Geological calibration of spallation production rates in the CRONUS-Earth project. *Quaternary Geochronology*, 31, 188-198. doi:10.1016/j.quageo.2015.01.009
- Lal, D. (1991). Cosmic ray labeling of erosion surfaces: in situ nuclide production rates and erosion models. *Earth and Planetary Science Letters*, 104(2), 424-439. doi:10.1016/0012-821X(91)90220-C
- Nishiizumi, K., Imamura, M., Caffee, M. W., Southon, J. R., Finkel, R. C., & McAninch, J. (2007). Absolute calibration of <sup>10</sup>Be AMS standards. *Nuclear Instruments and Methods in Physics Research Section B: Beam Interactions with Materials and Atoms*, 258(2), 403-413. doi:10.1016/j.nimb.2007.01.297
- Stone, J. O. (2000). Air pressure and cosmogenic isotope production. *Journal of Geophysical Research: Solid Earth*, 105(B10), 23753-23759. doi:10.1029/2000JB900181
